# Supplementary material for: Iron-promoted dealkylative carbene aminocyclization of δ-arylamino-α-diazoesters
Source: Royal Society of Chemistry journal article supplement (doi:10.1039/d0dt04373g), 2021-01-01
Supplement: d0dt04373g1.pdf [file d0dt04373g1.pdf]

## Iron-promoted dealkylative carbene aminocyclization of $\delta$ -arylamino- $\alpha$ -diazoesters

D. Solé,<sup>\*a</sup> Arianna Amenta,<sup>a</sup> Cristina Campos<sup>a</sup> and I. Fernández<sup>\*b</sup>

<sup>a</sup> *Laboratori de Química Orgànica, Facultat de Farmàcia i Ciències de l'Alimentació, Universitat de Barcelona, Av. Joan XXIII 27-31, 08028-Barcelona, Spain, E-mail: dsole@ub.edu.*

<sup>b</sup> *Departamento de Química Orgánica I and Centro de Innovación en Química Avanzada (ORFEO-CINQA), Facultad de Ciencias Químicas, Universidad Complutense de Madrid, 28040-Madrid, Spain, Email: israel@quim.ucm.es.*

### Electronic Supplementary Information

#### Table of Contents

|                                                                           |                |
|---------------------------------------------------------------------------|----------------|
| Copies of <sup>1</sup> H and <sup>13</sup> C NMR spectra of new compounds | <b>S2-S66</b>  |
| Cartesian coordinates and total energies                                  | <b>S67-S74</b> |

Copies of  $^1\text{H}$  and  $^{13}\text{C}$  NMR spectra of new compounds

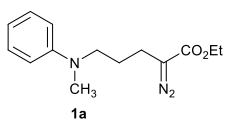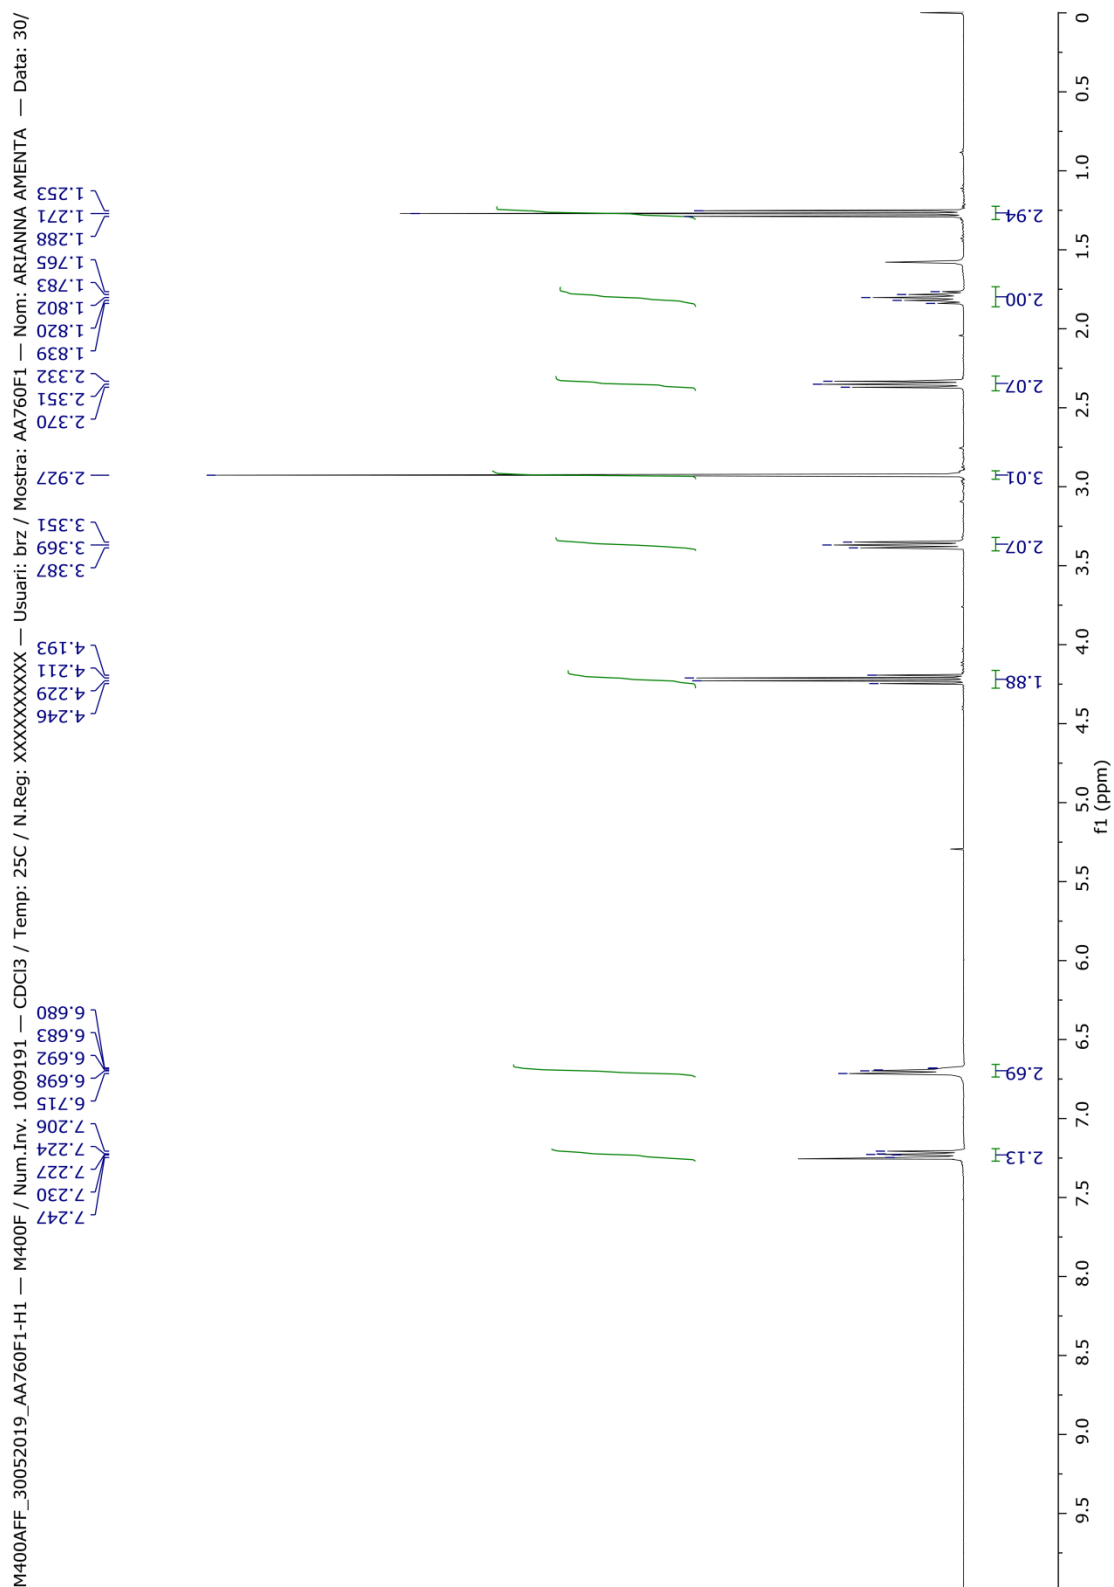

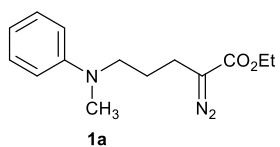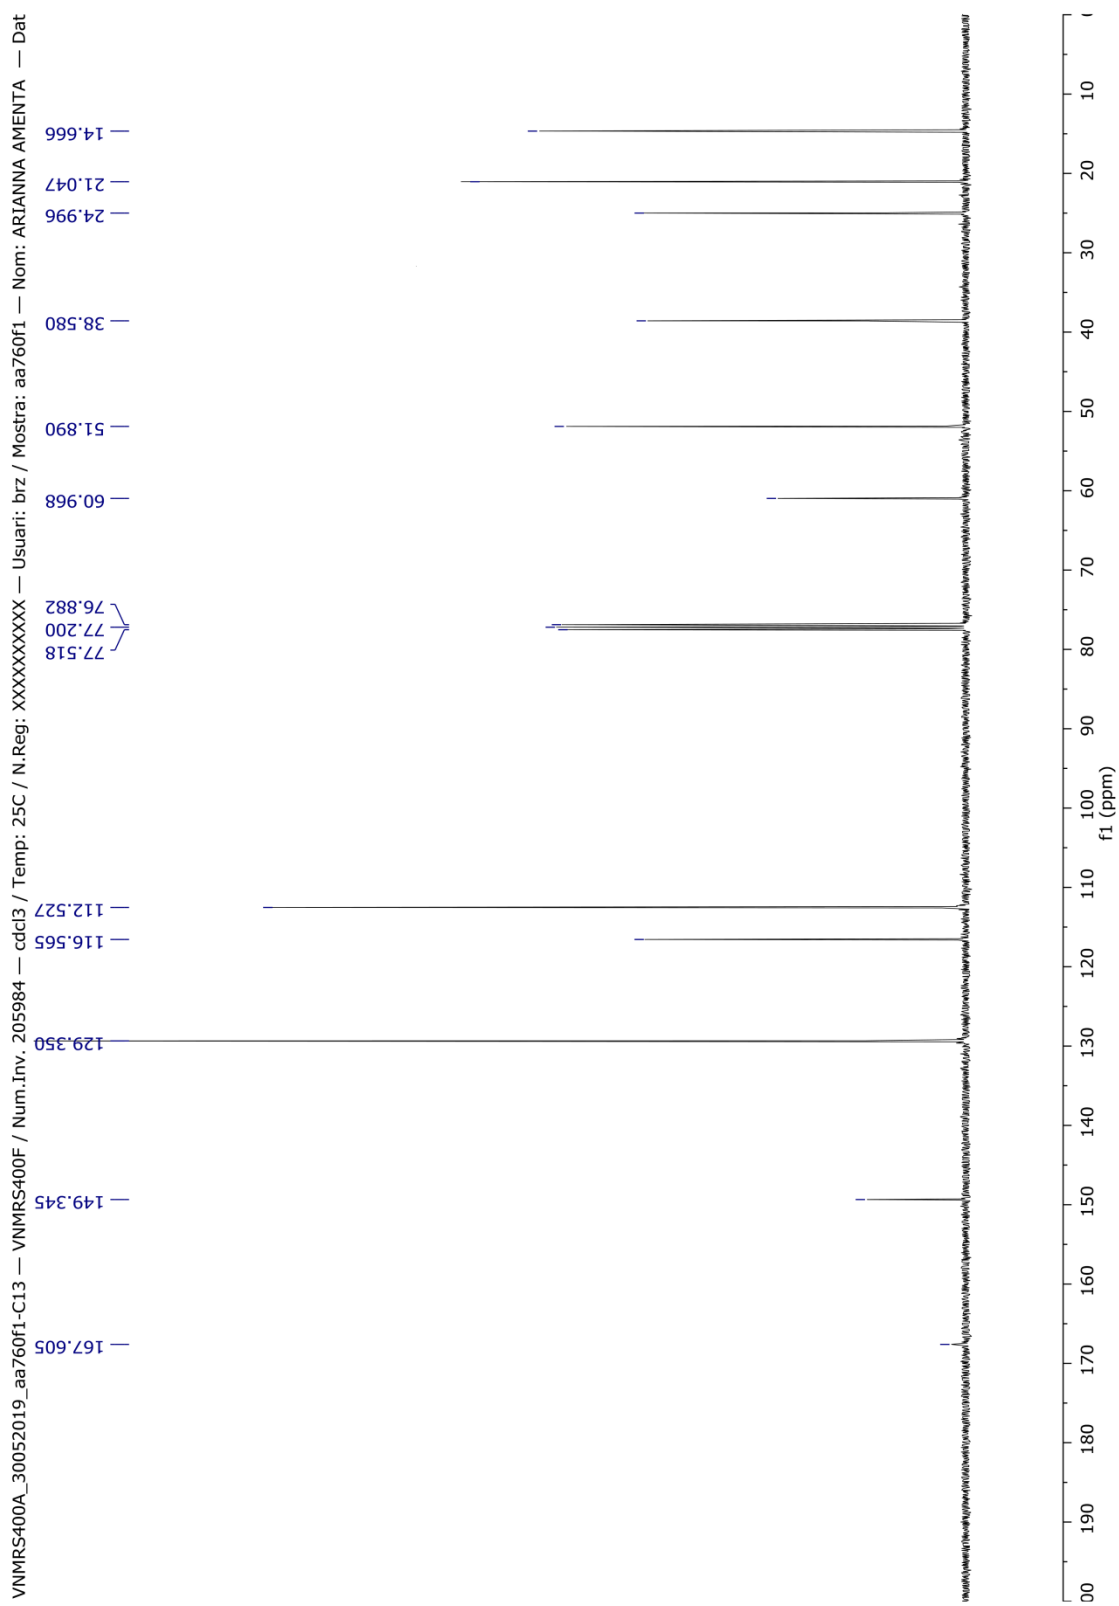

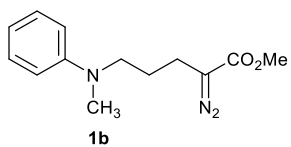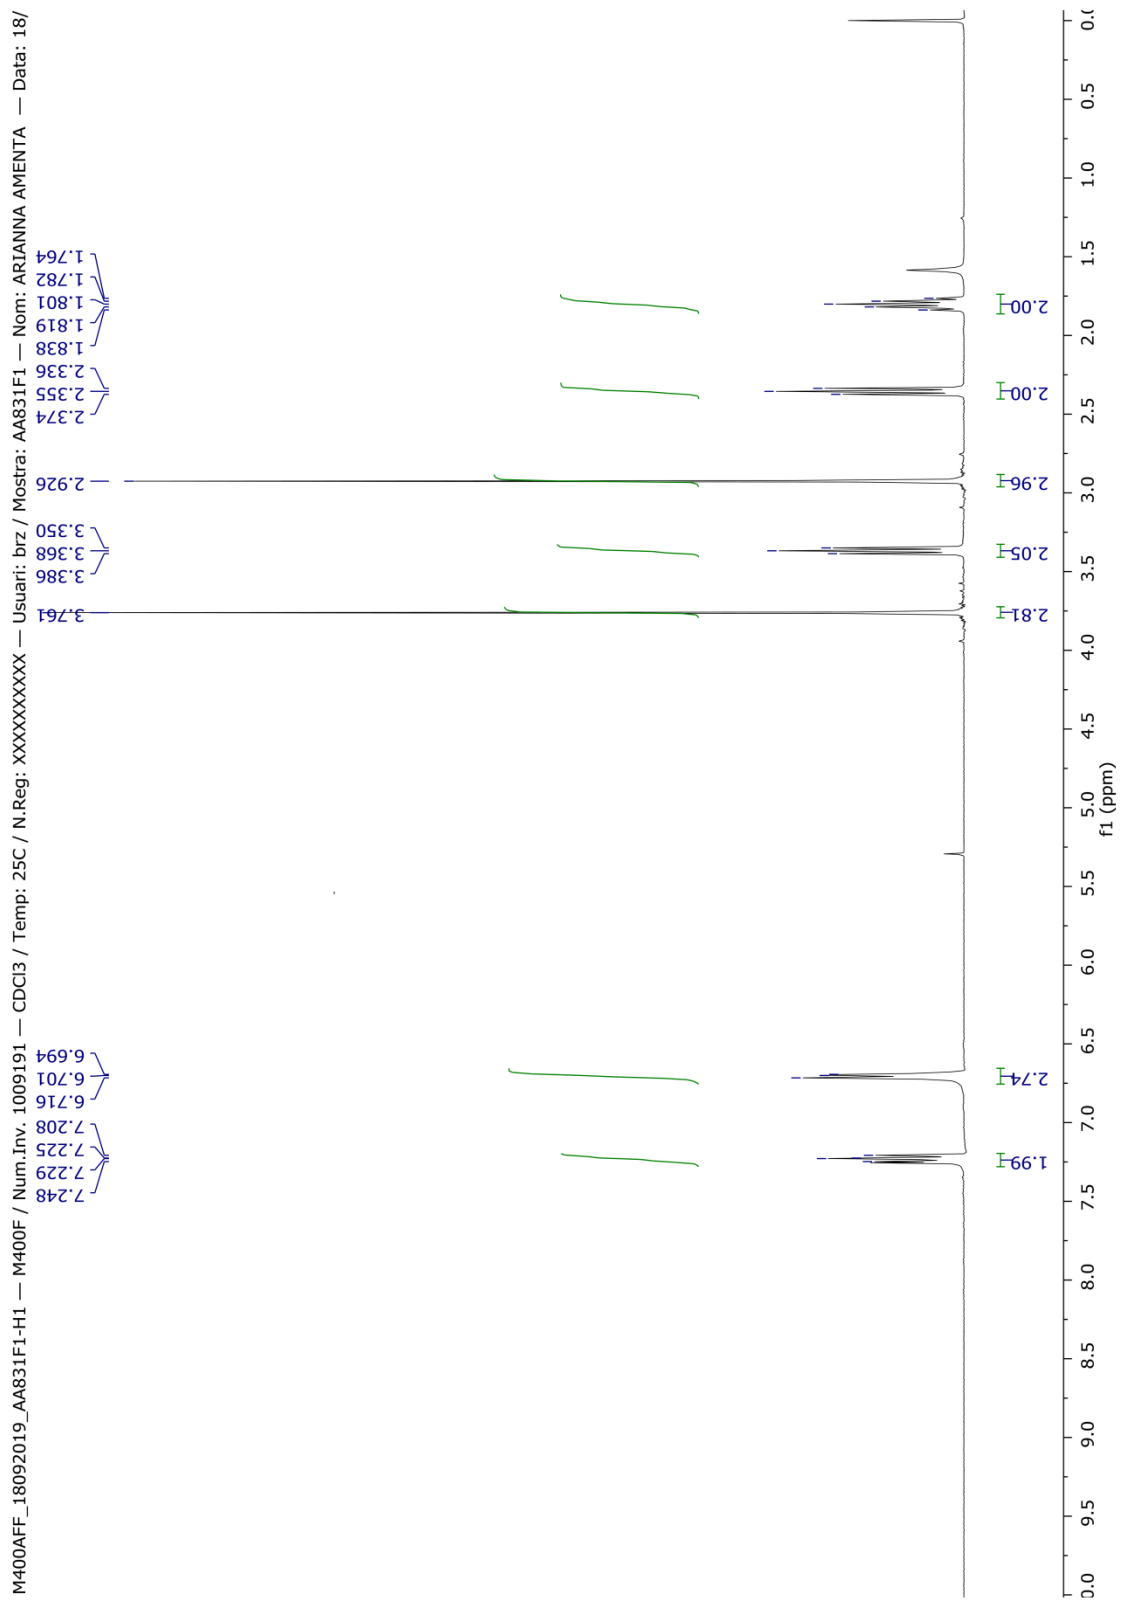



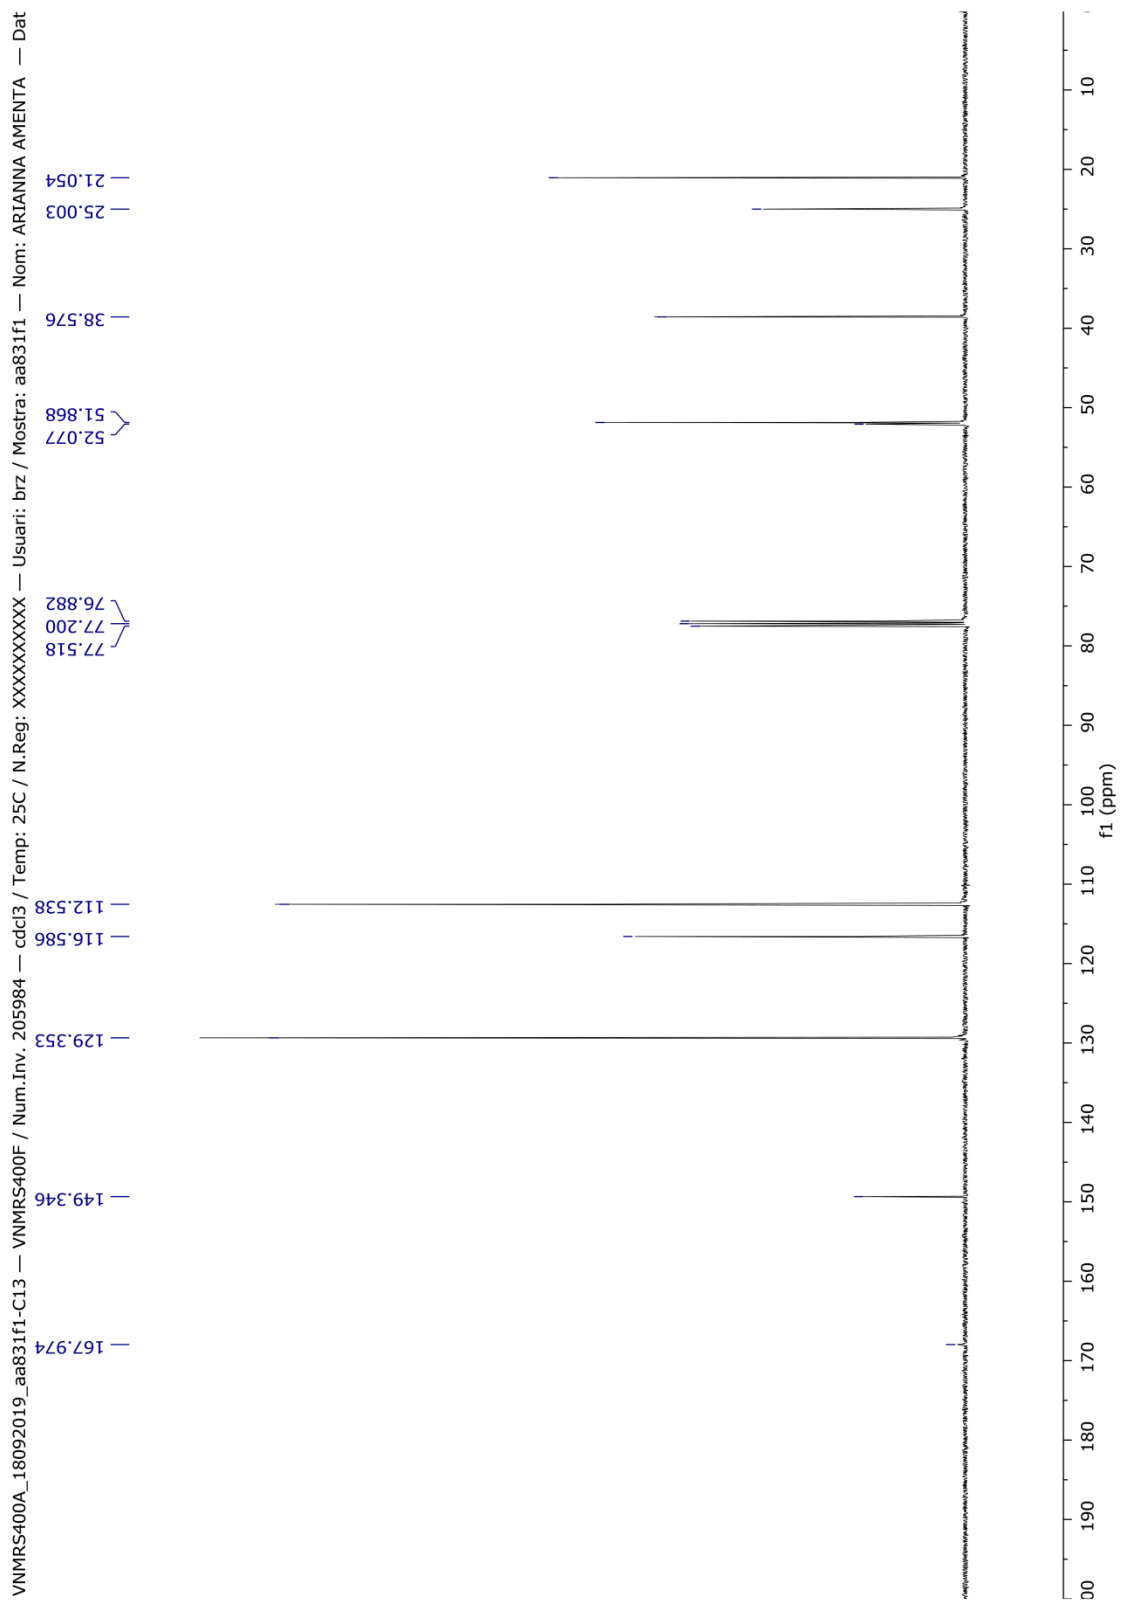

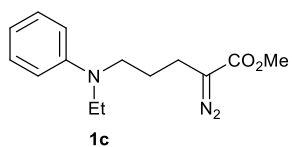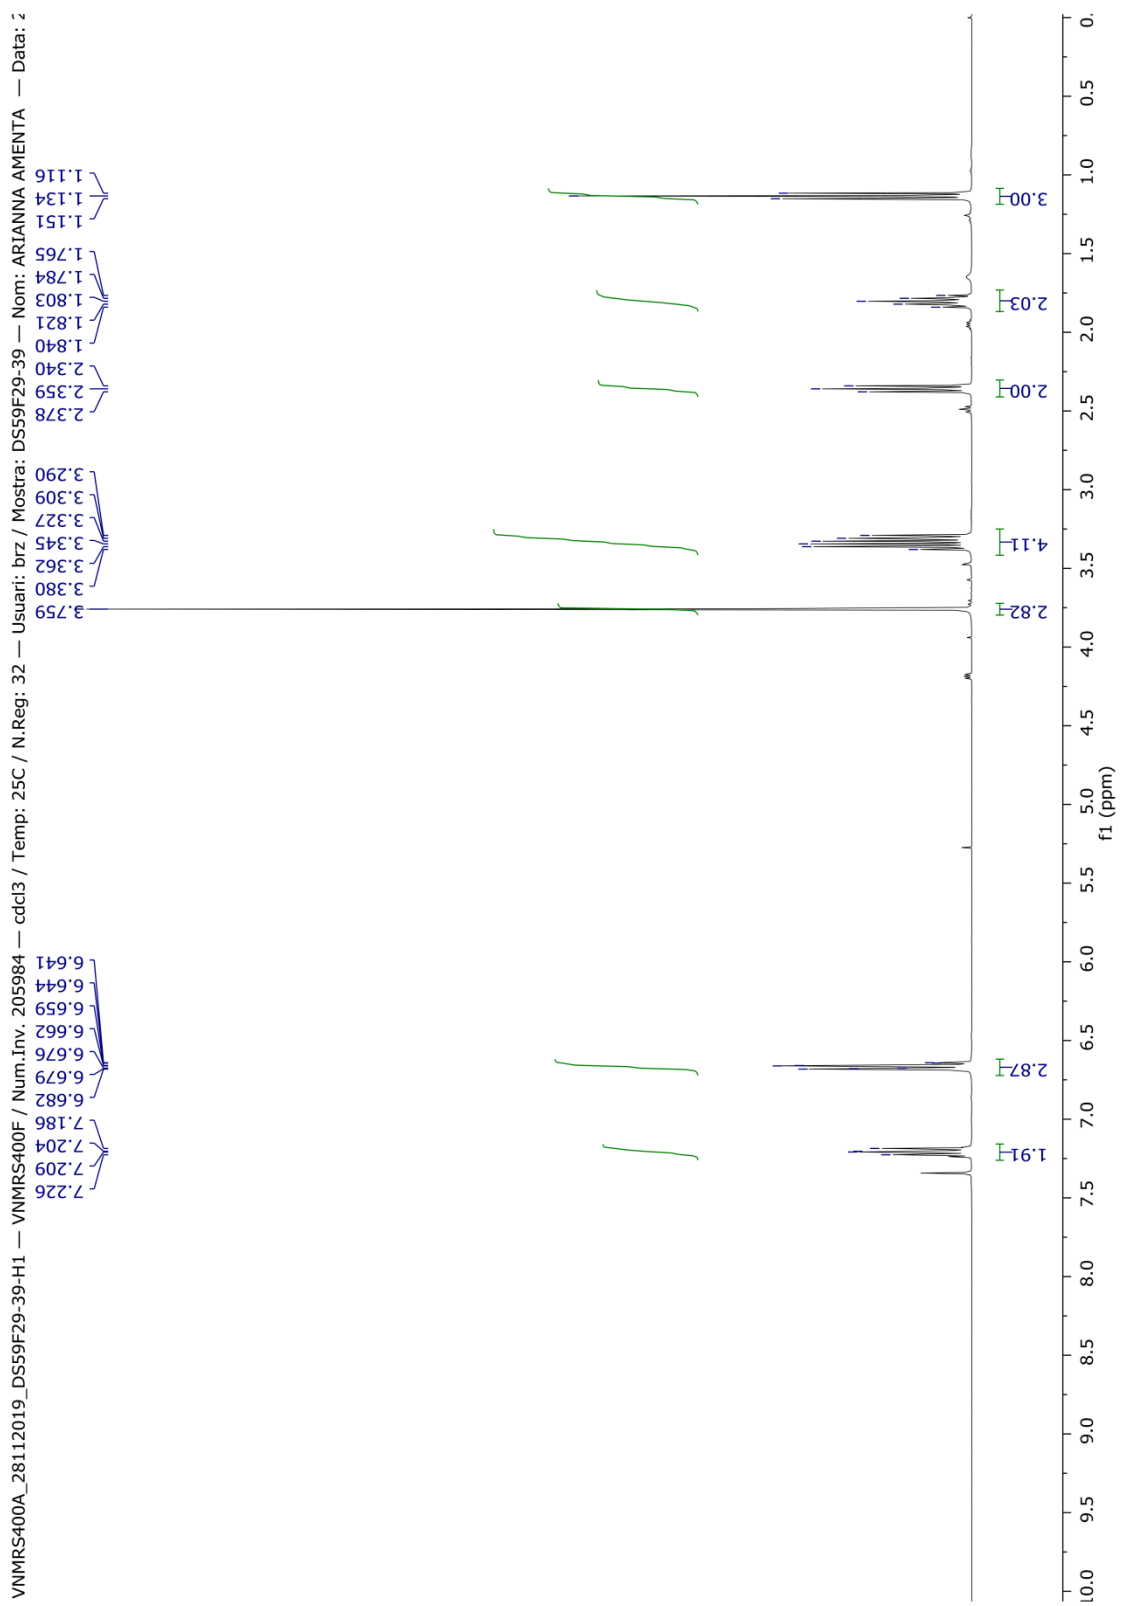

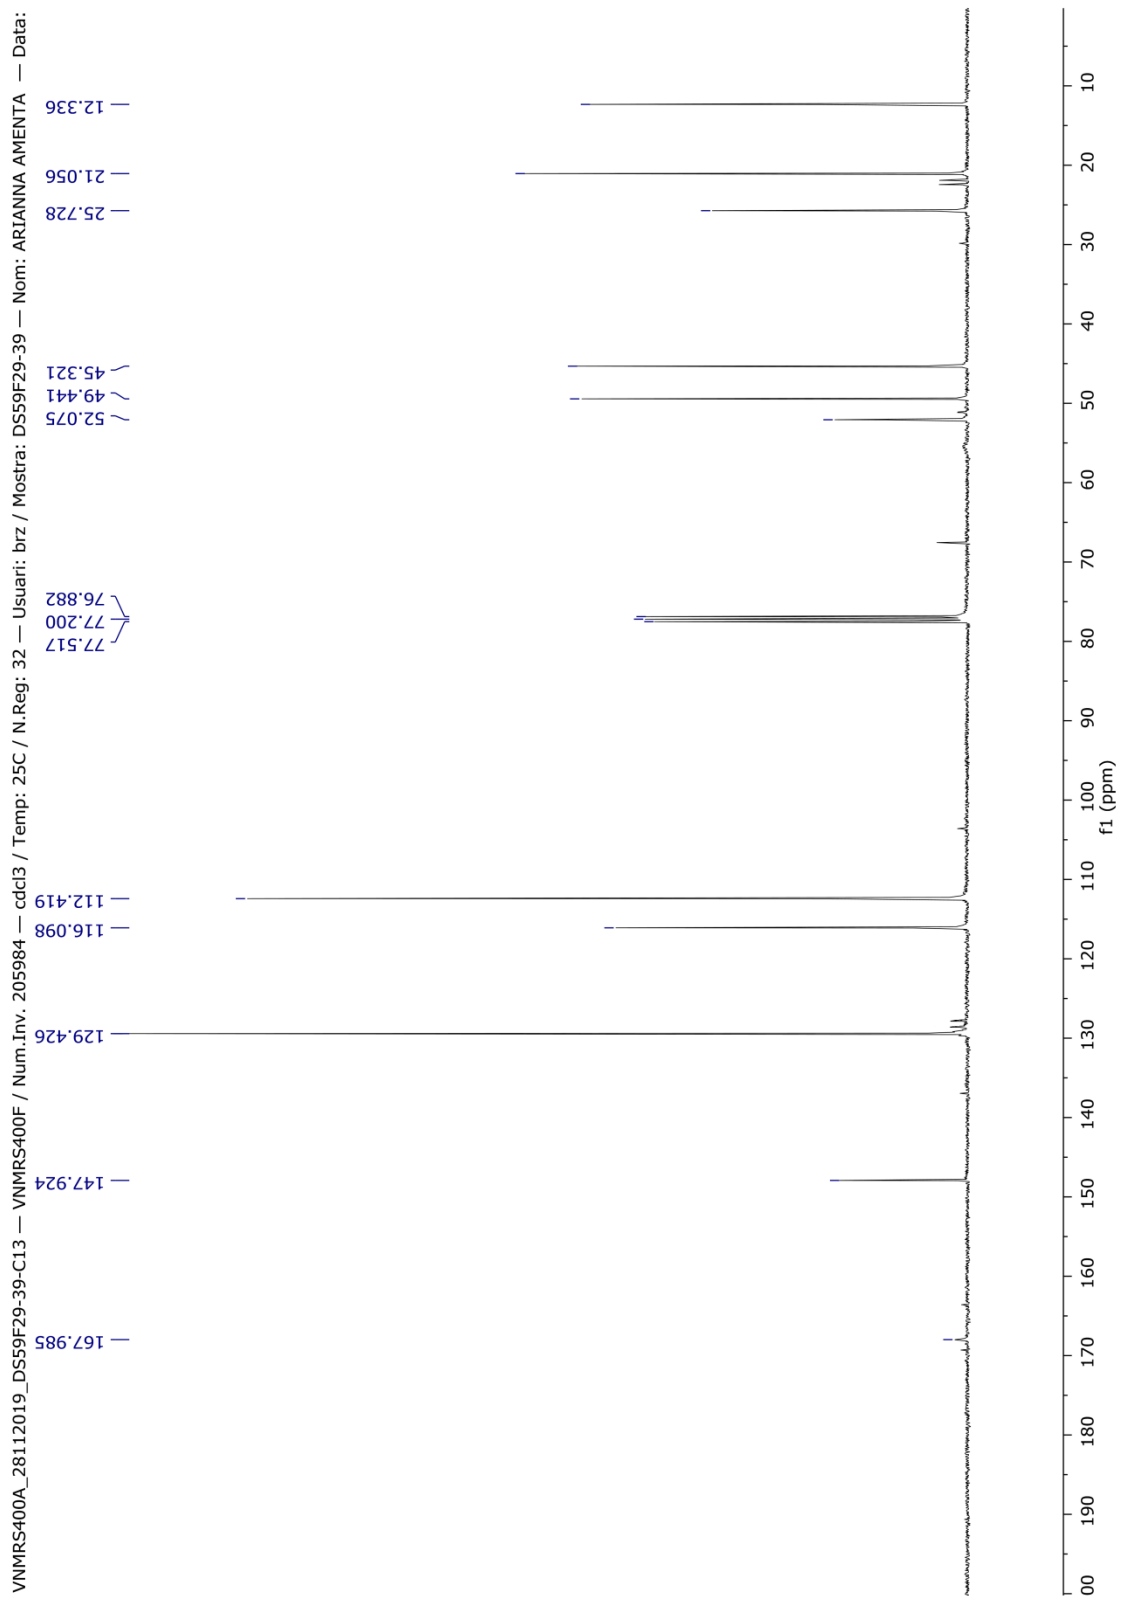

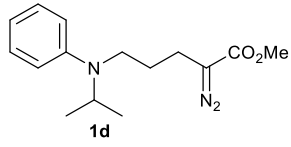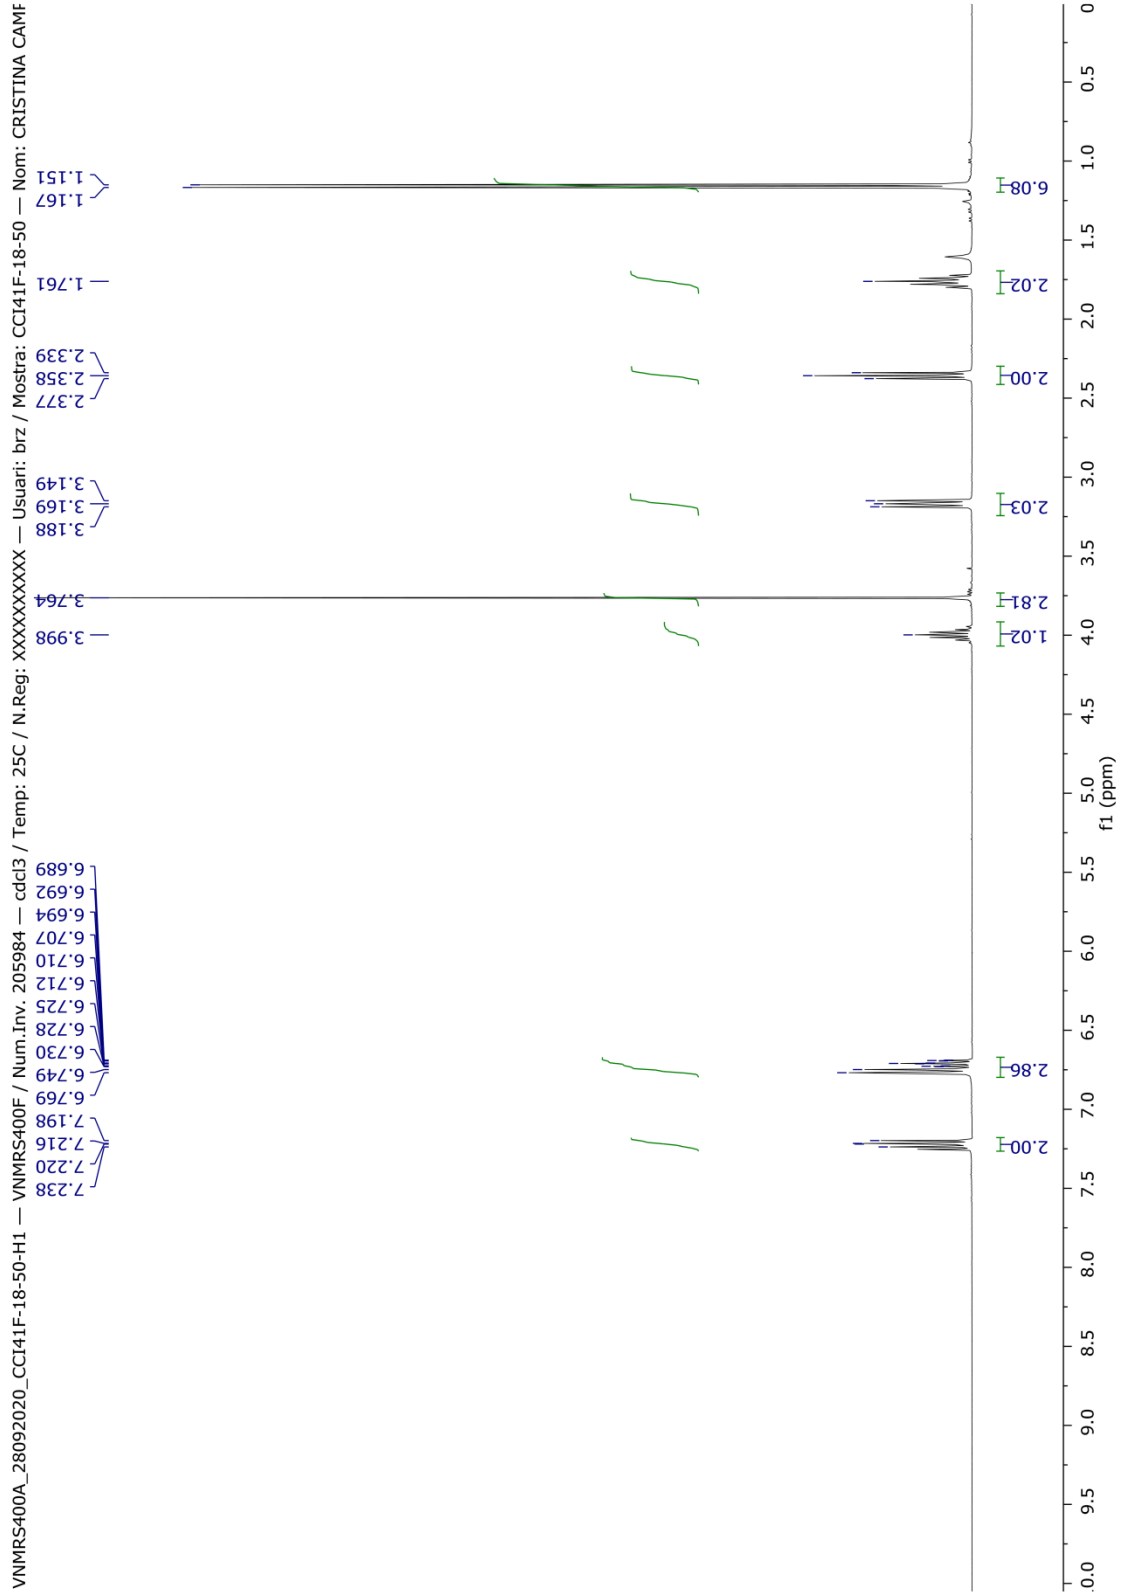

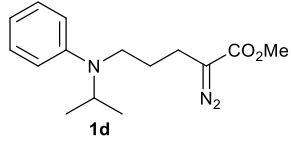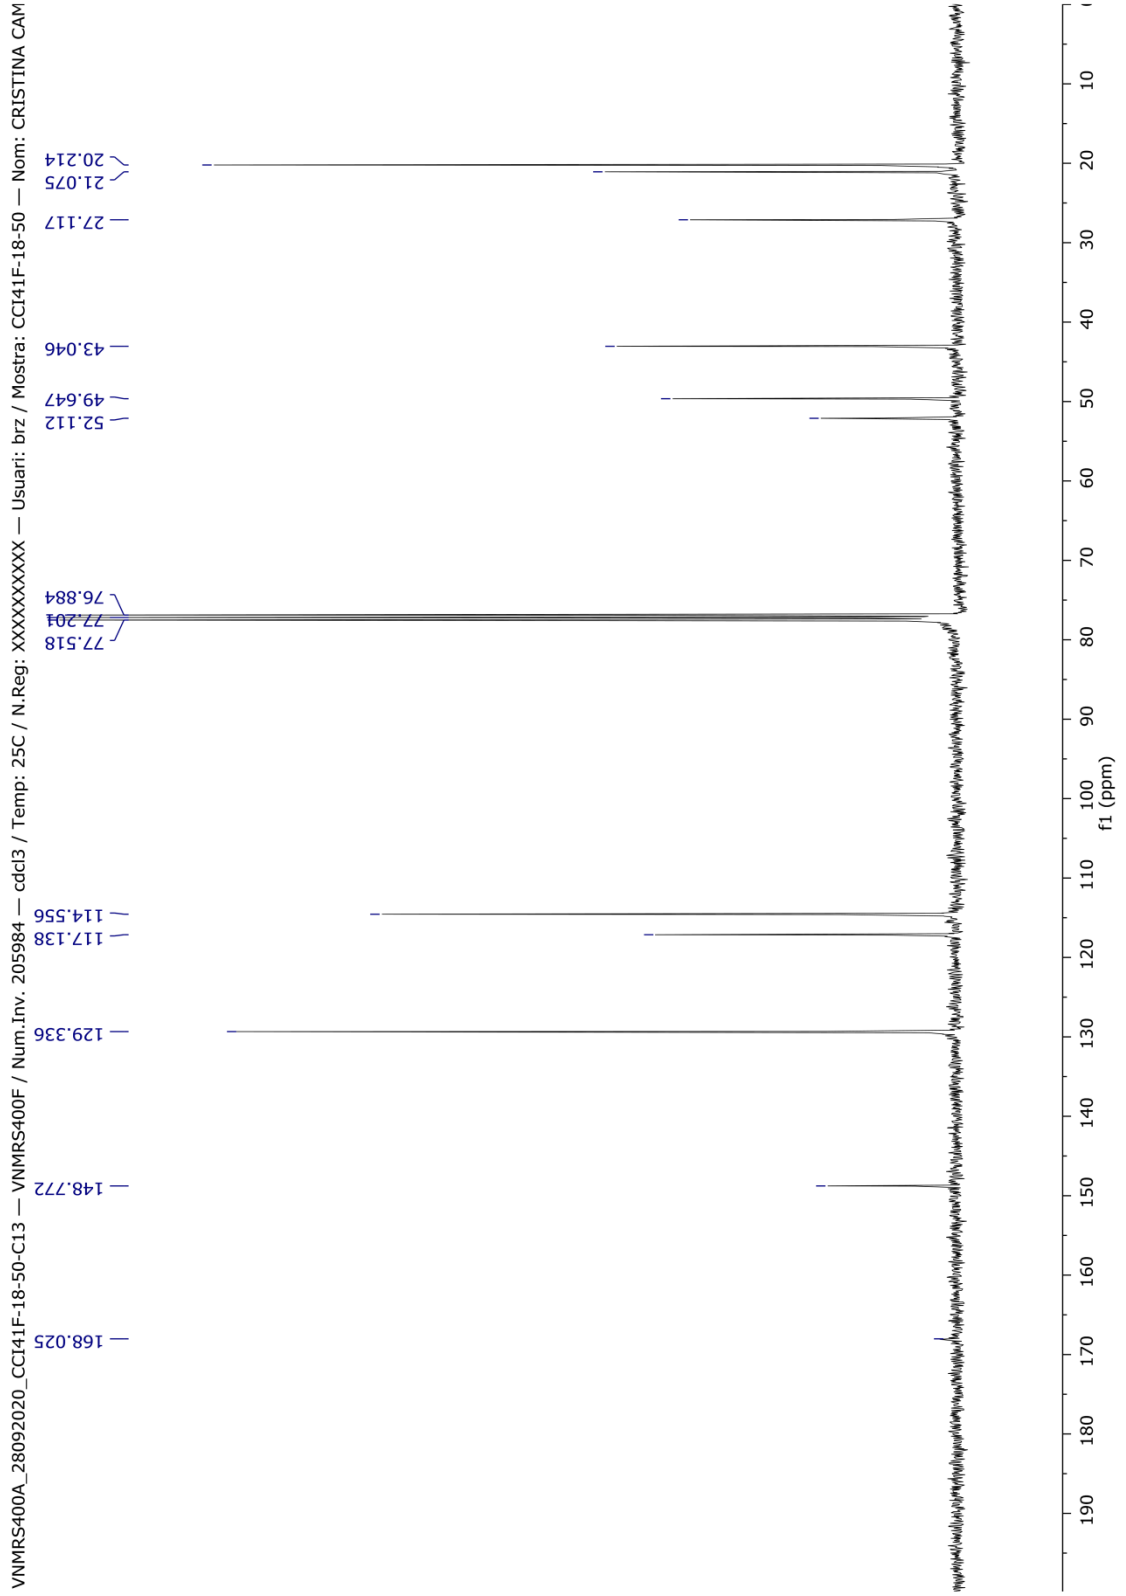

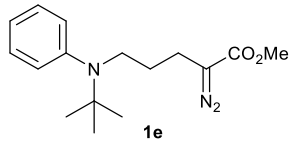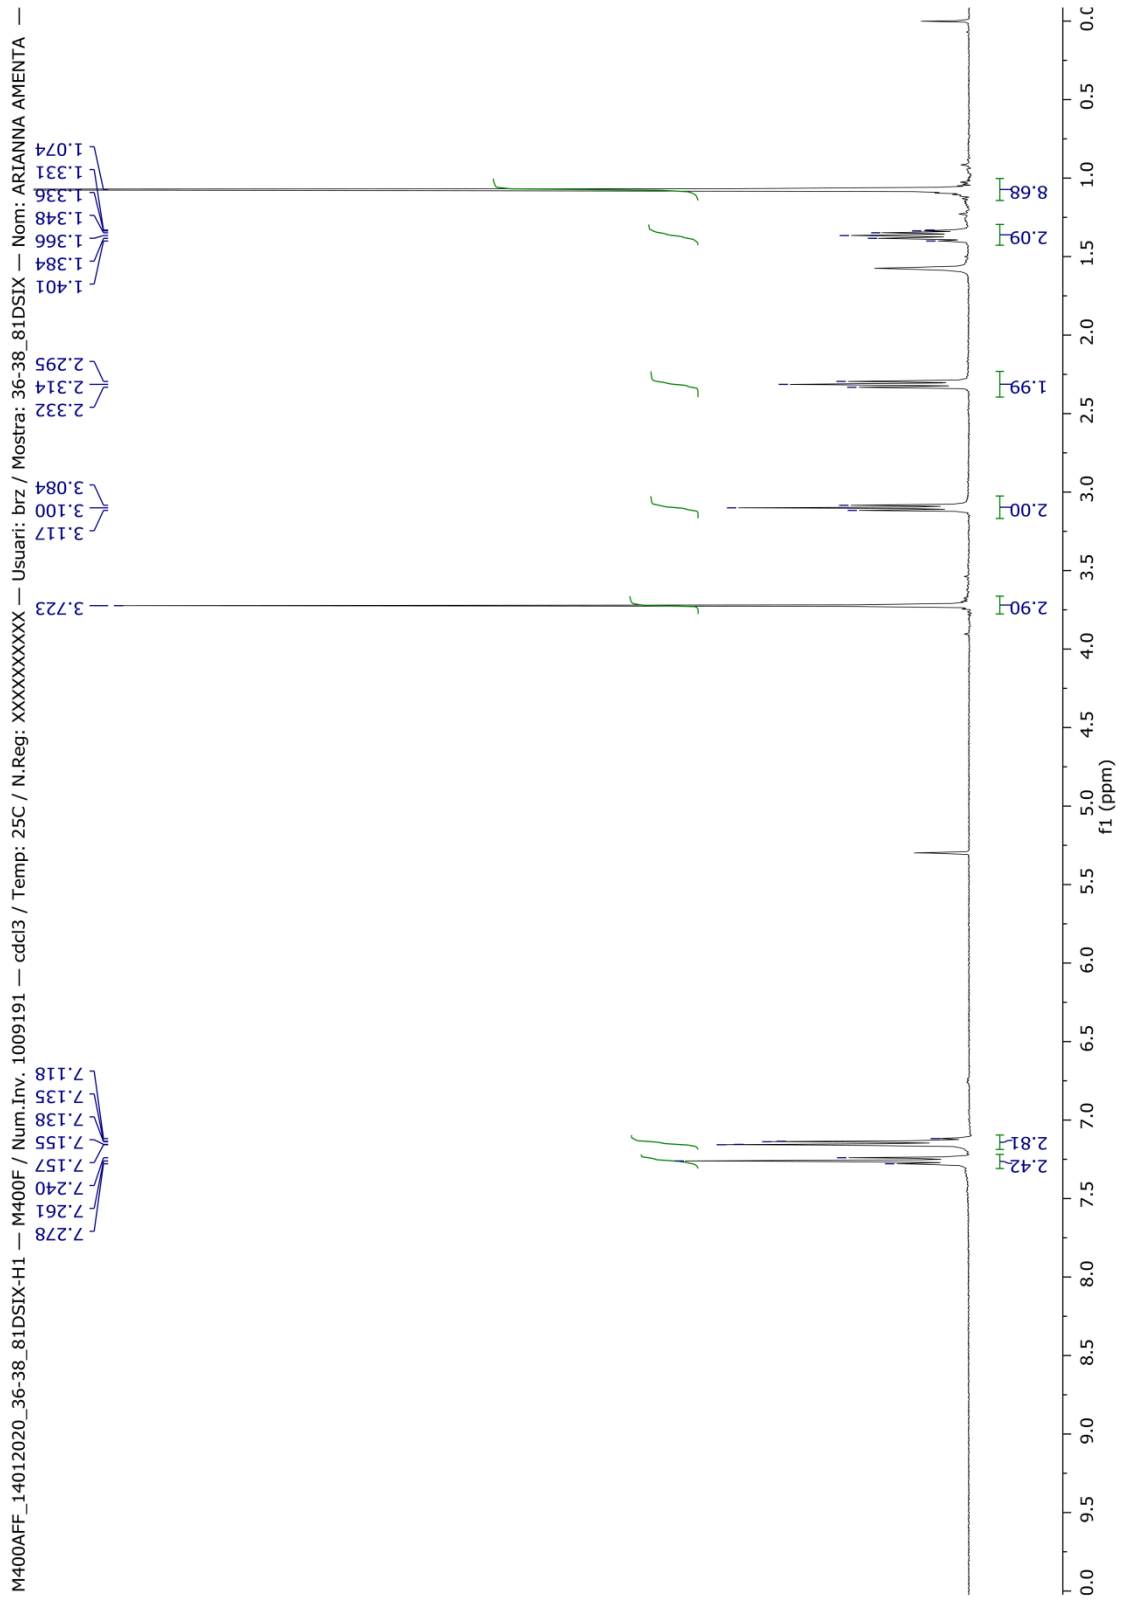

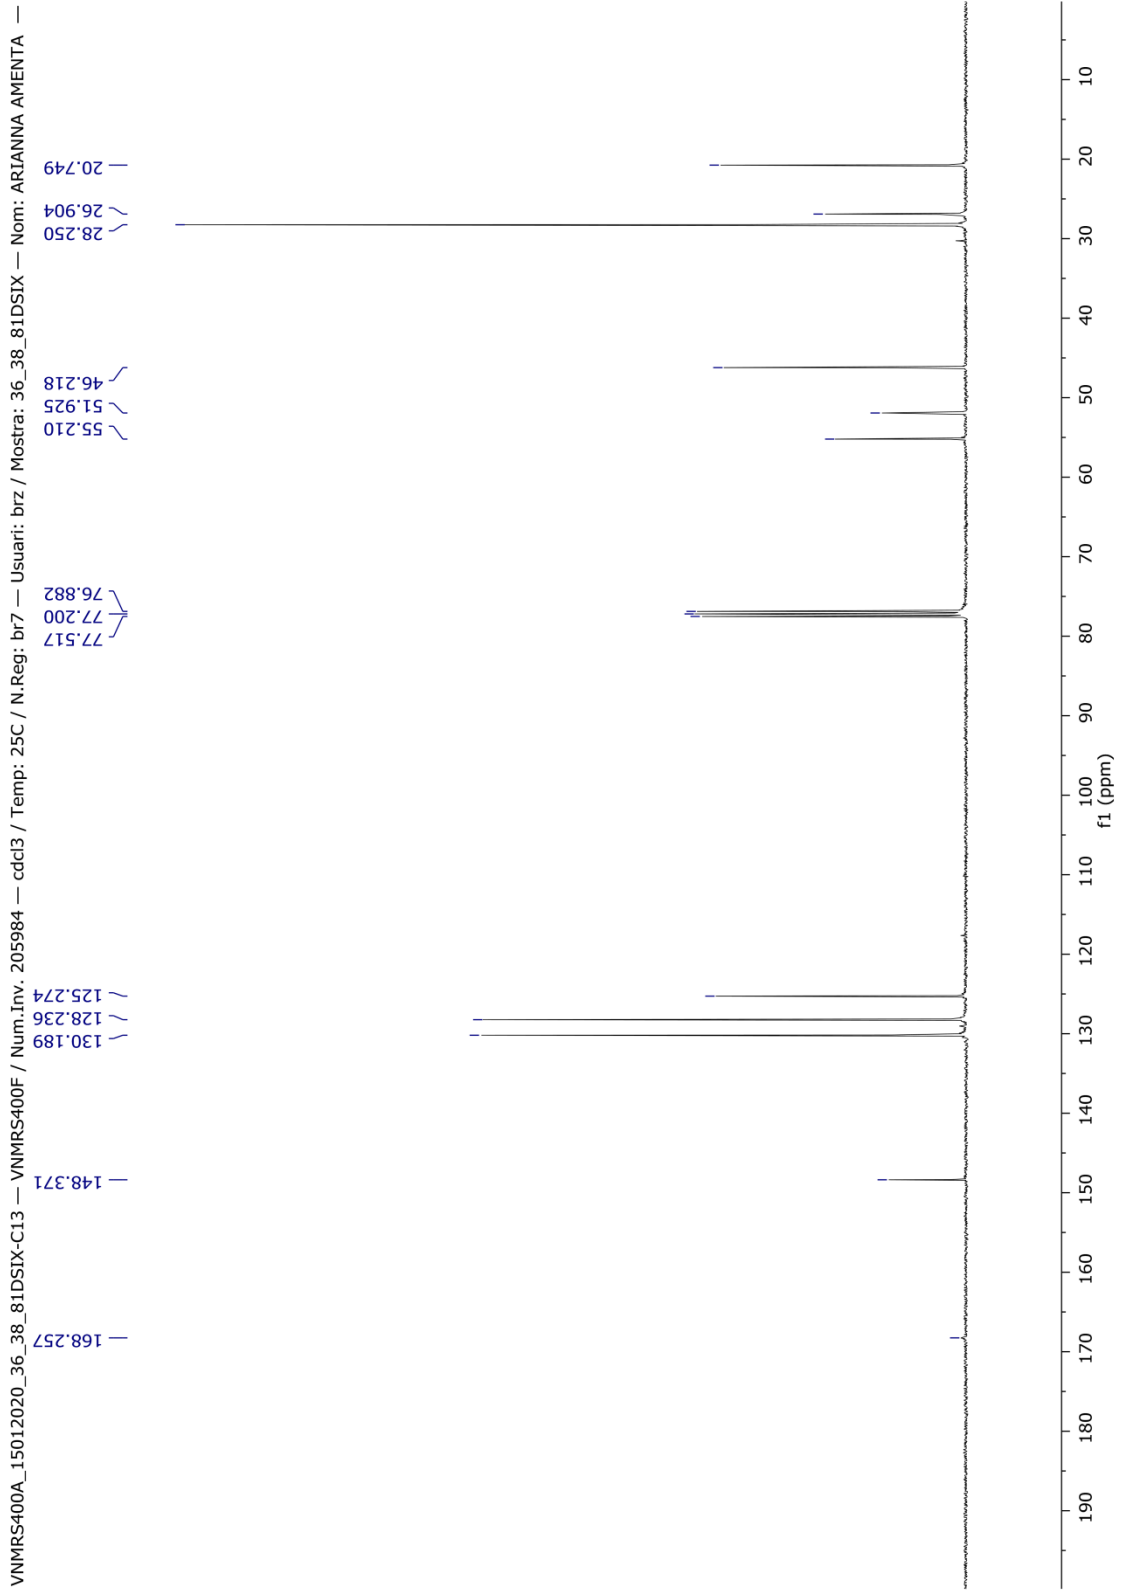

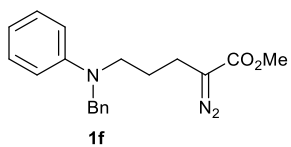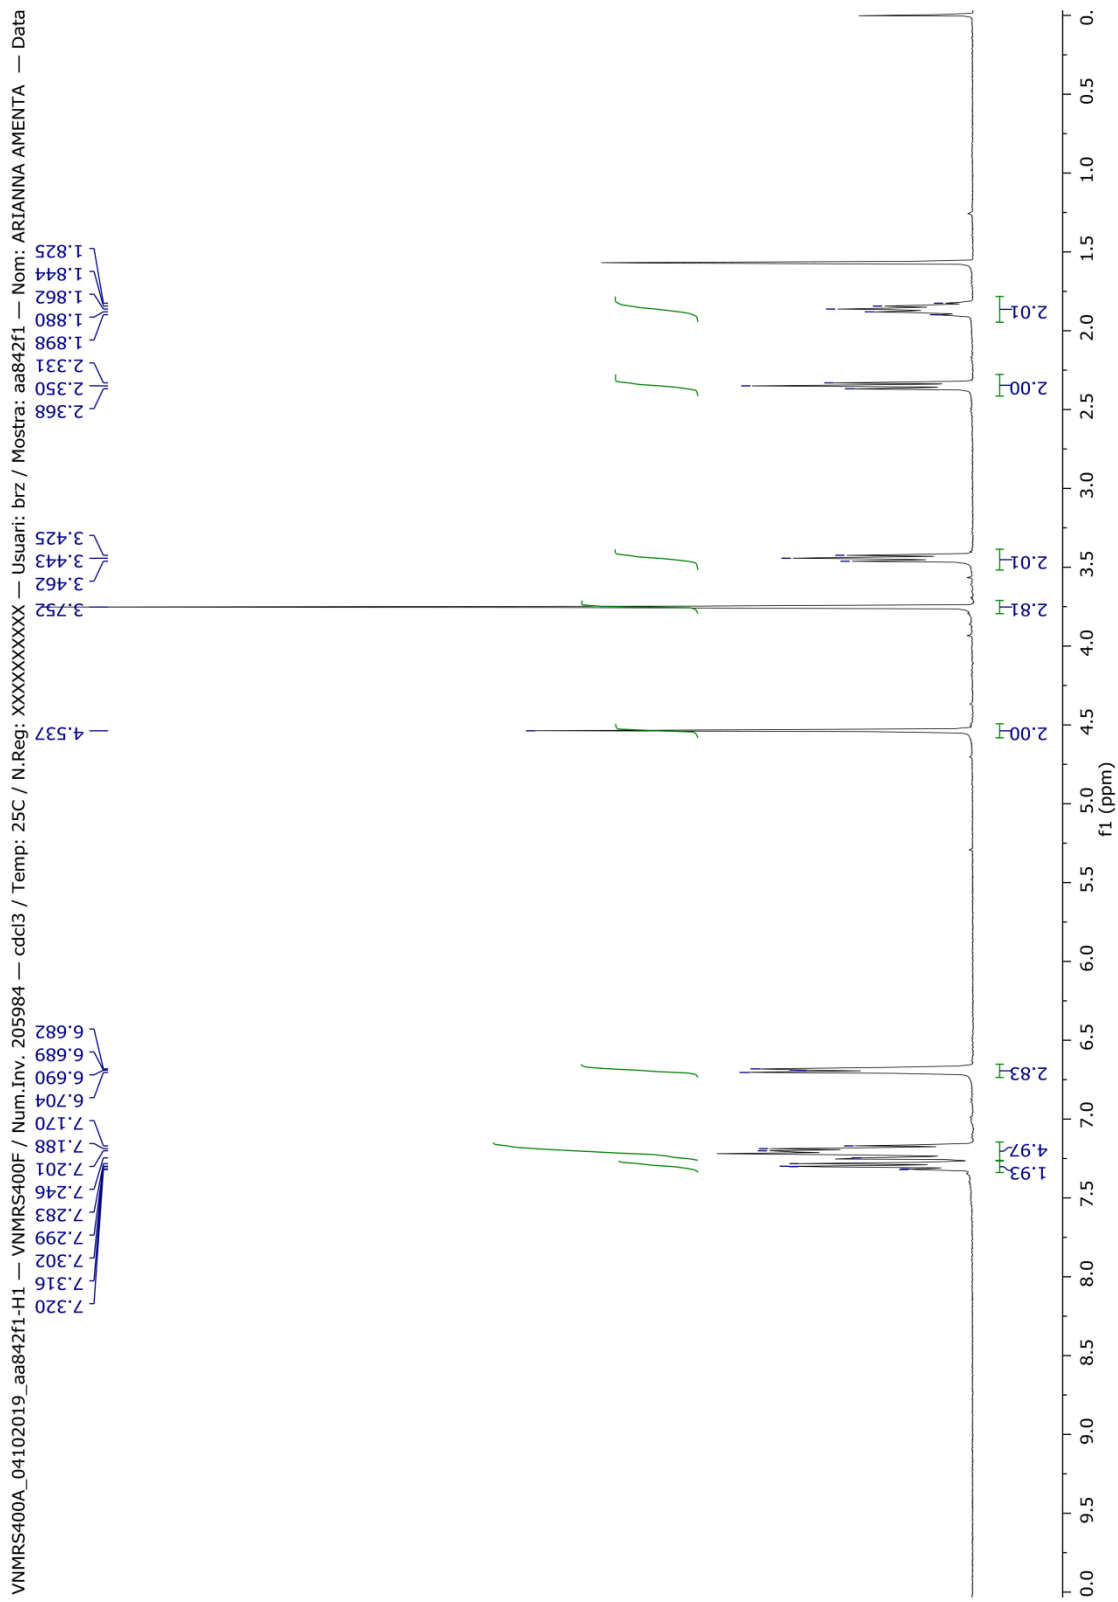



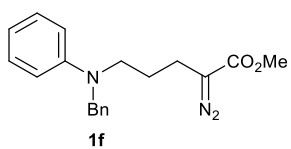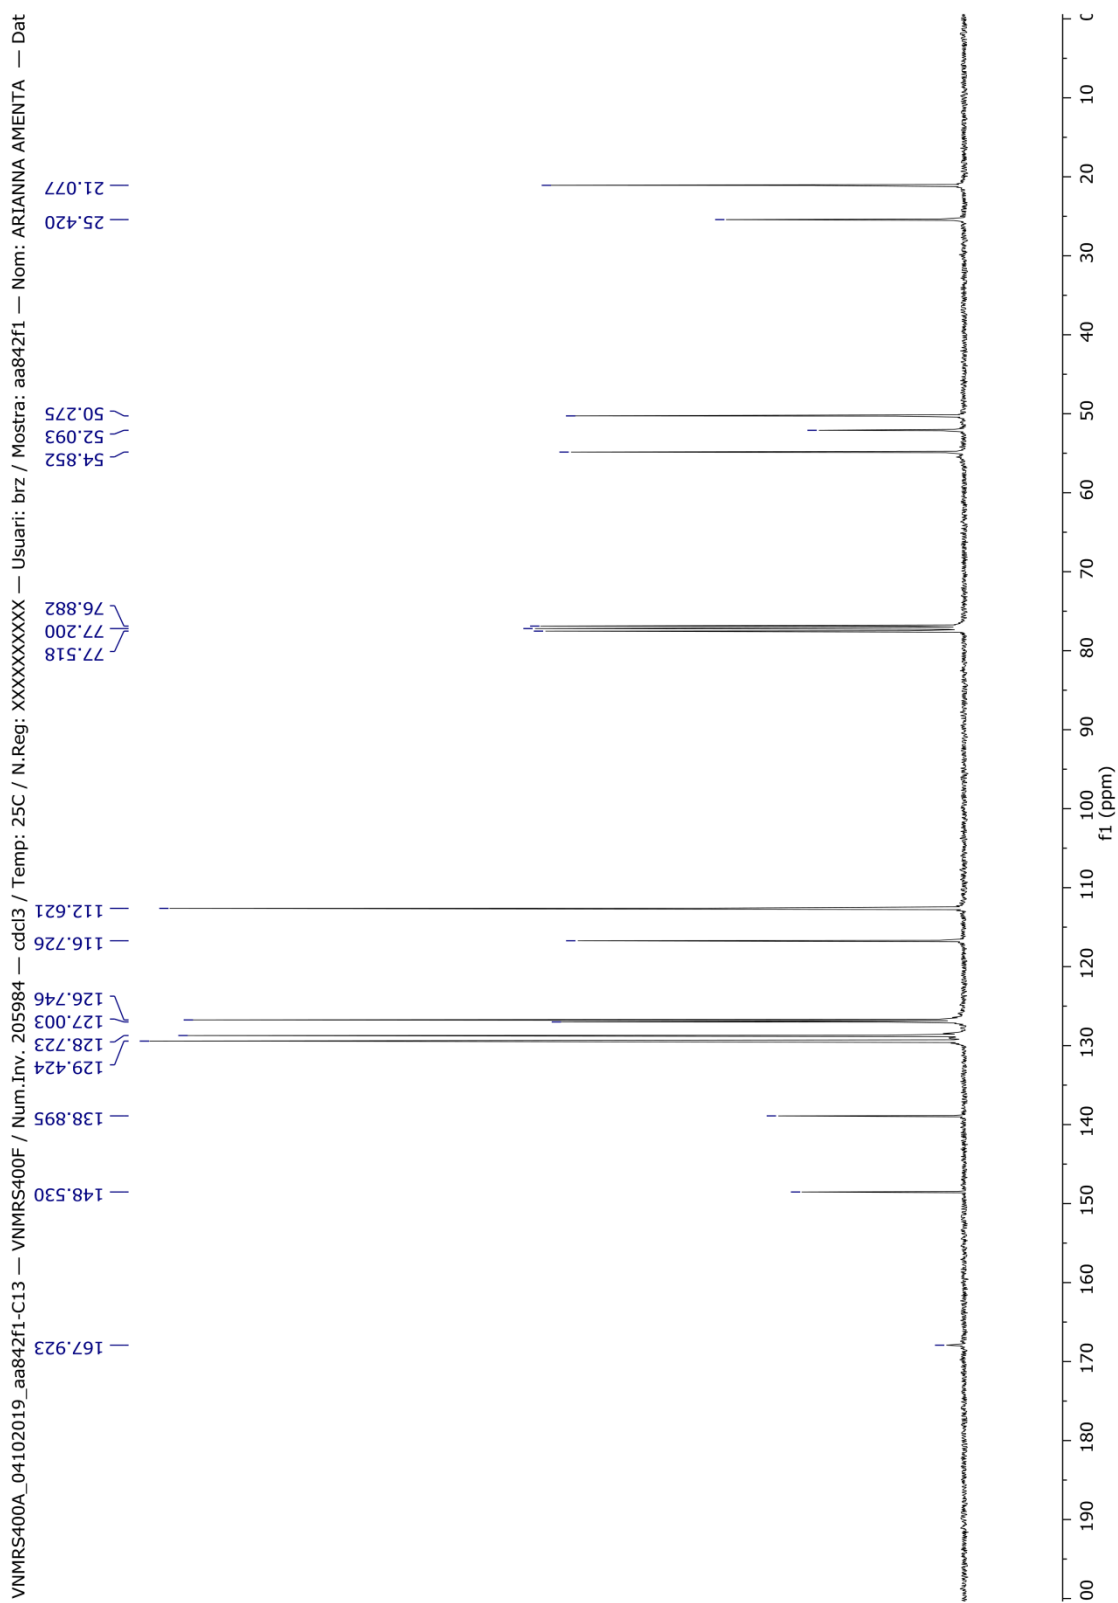

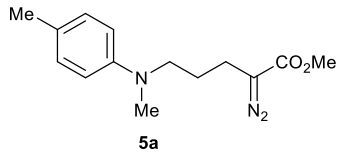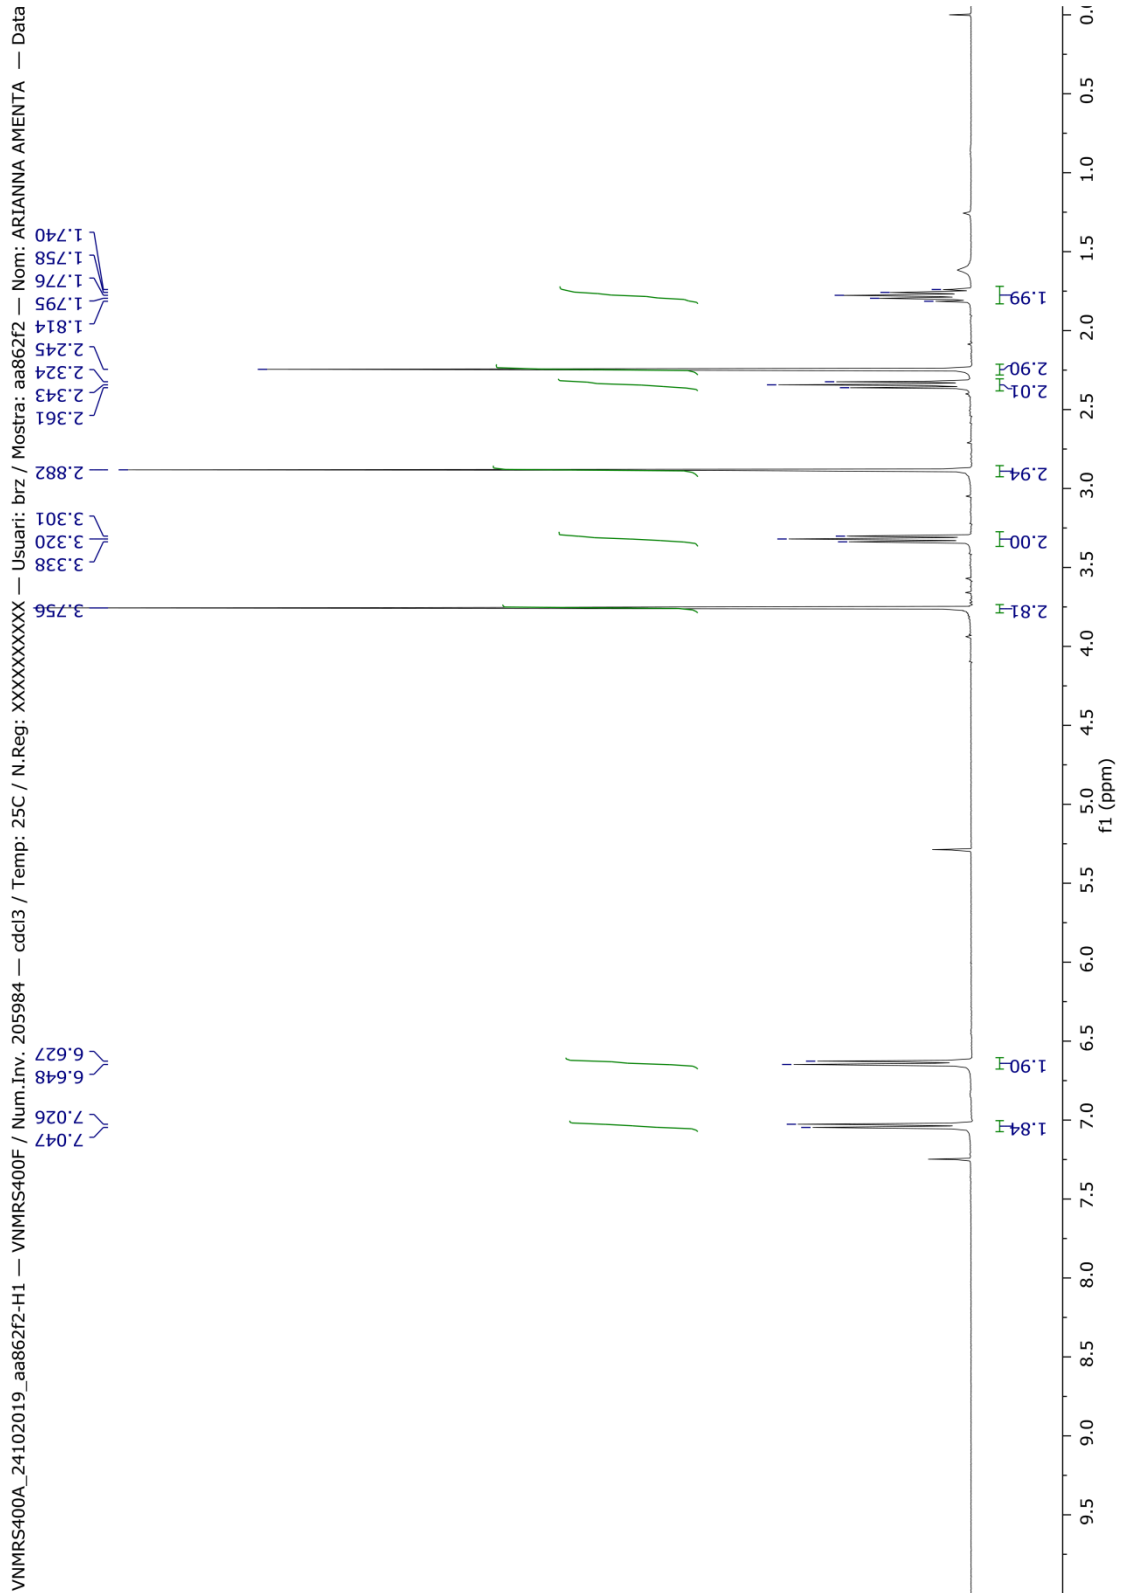

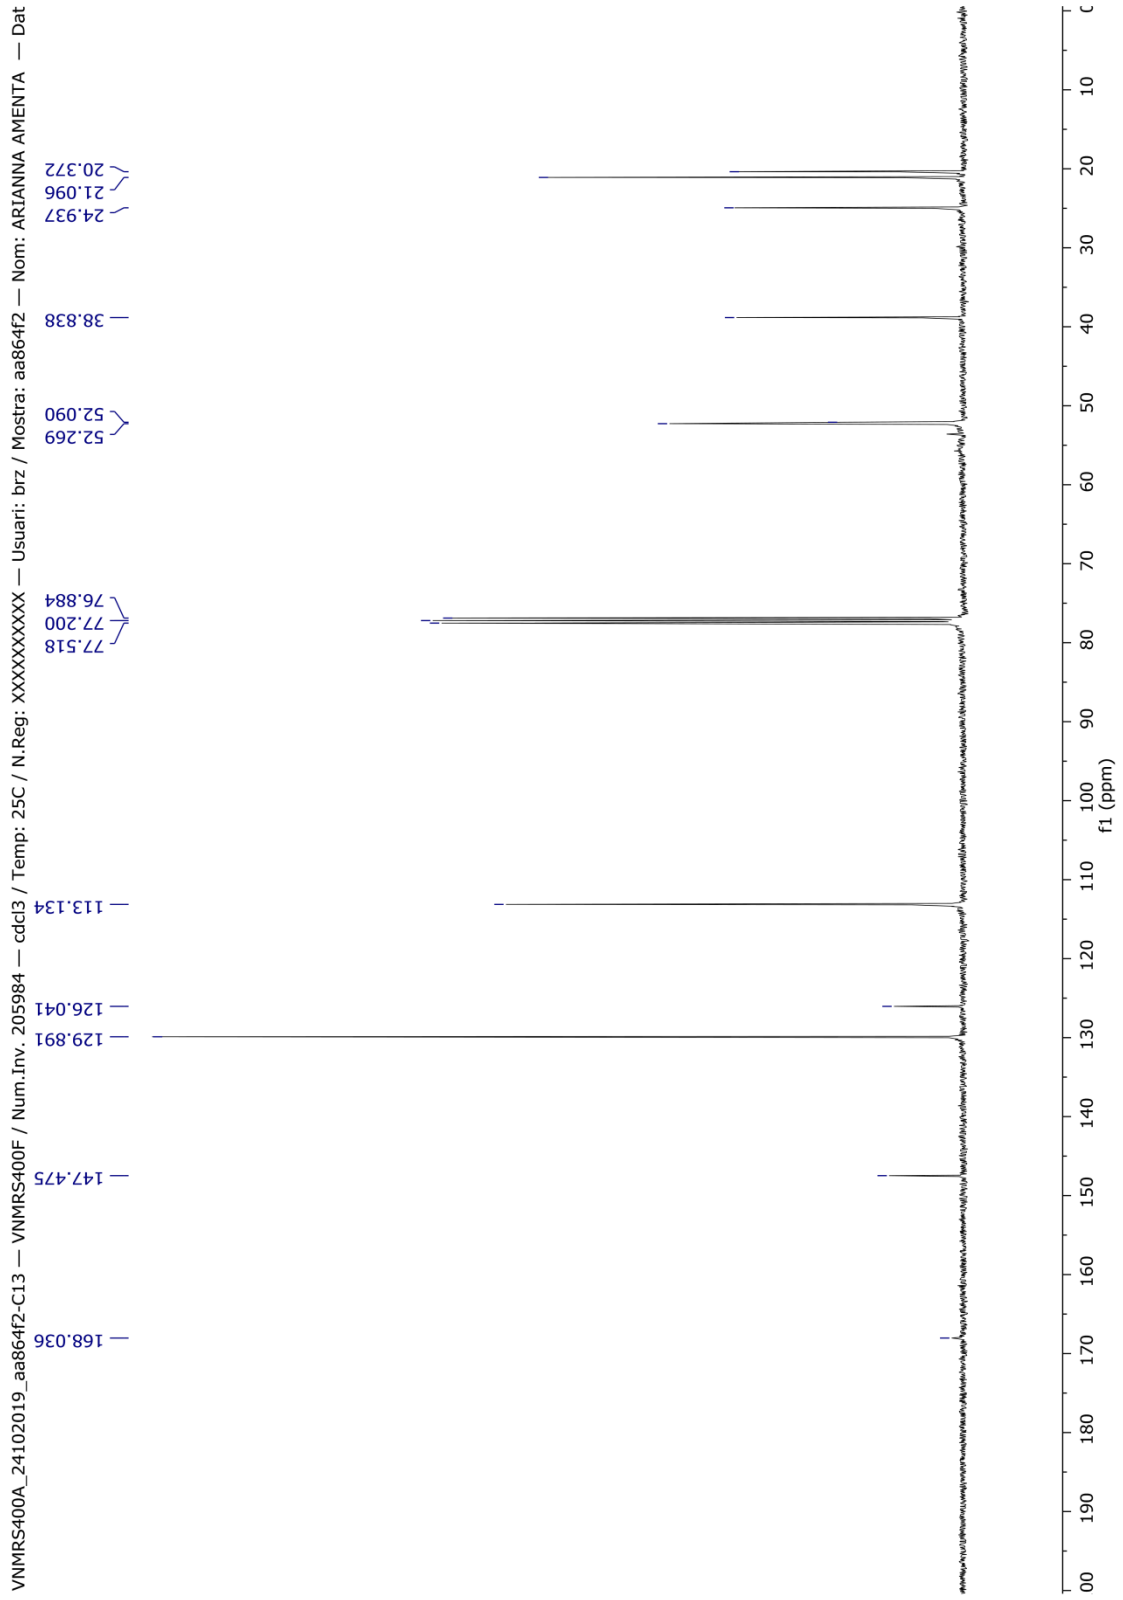

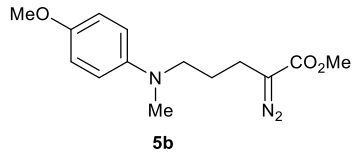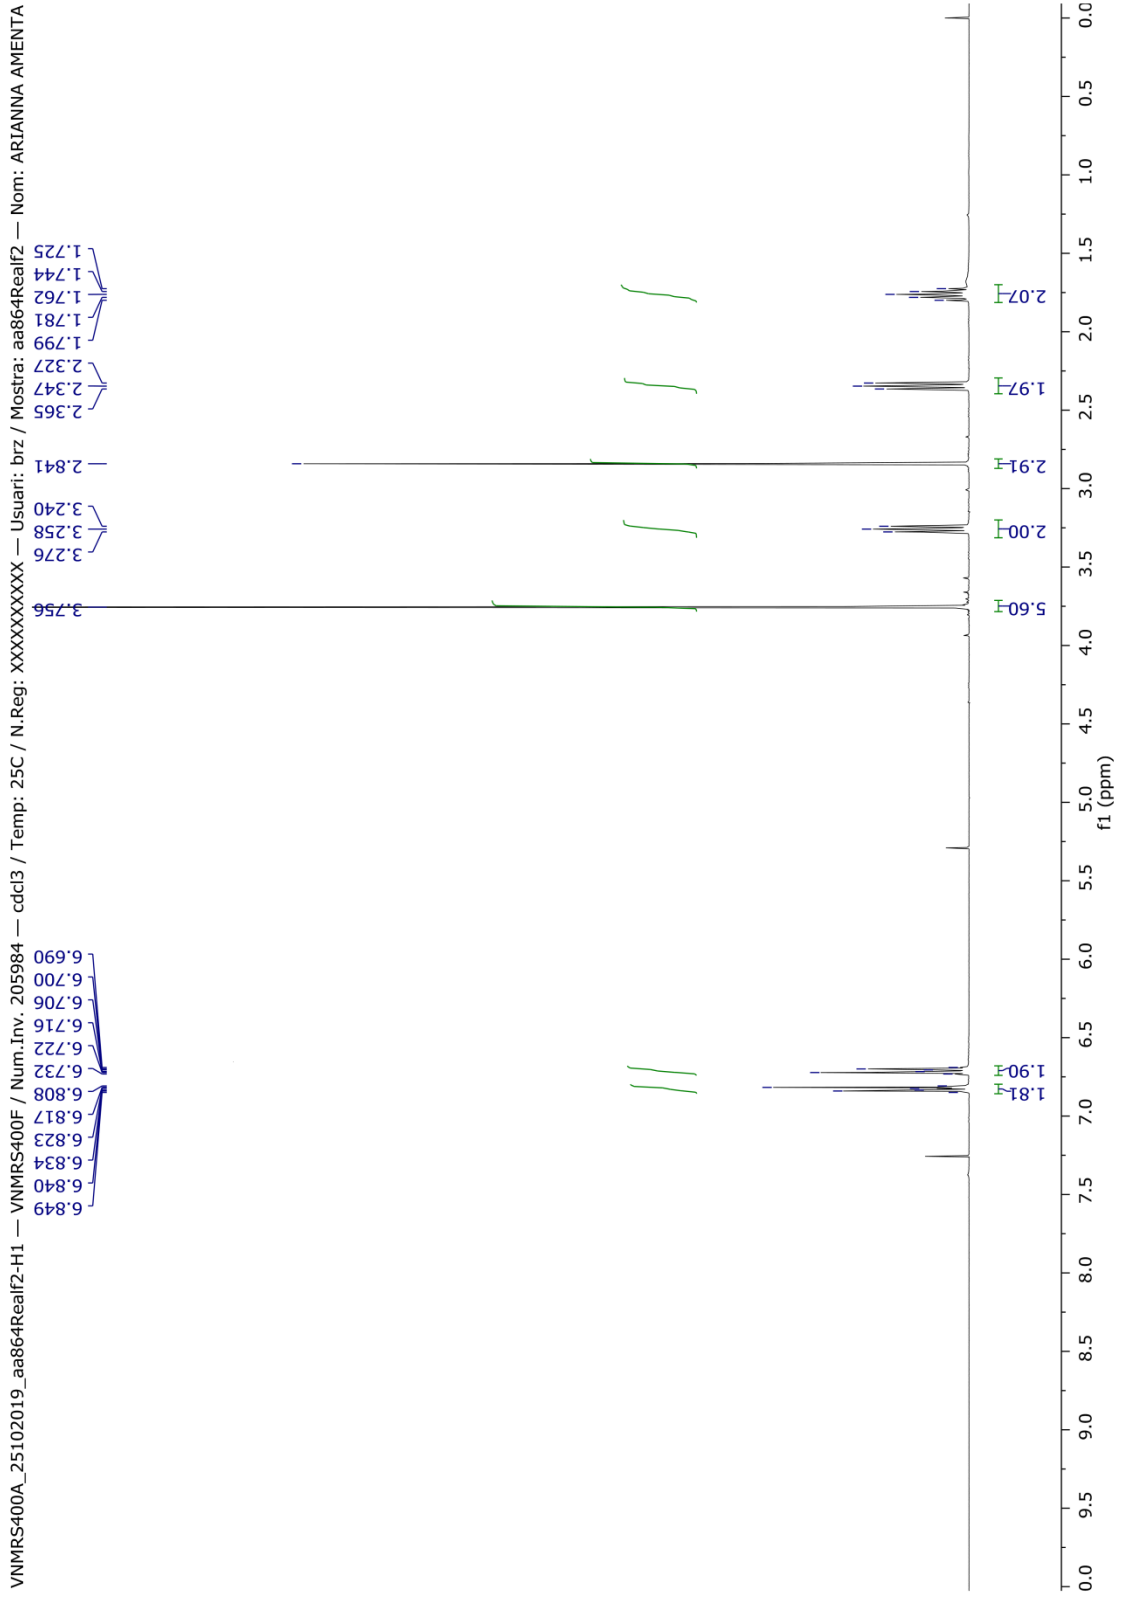

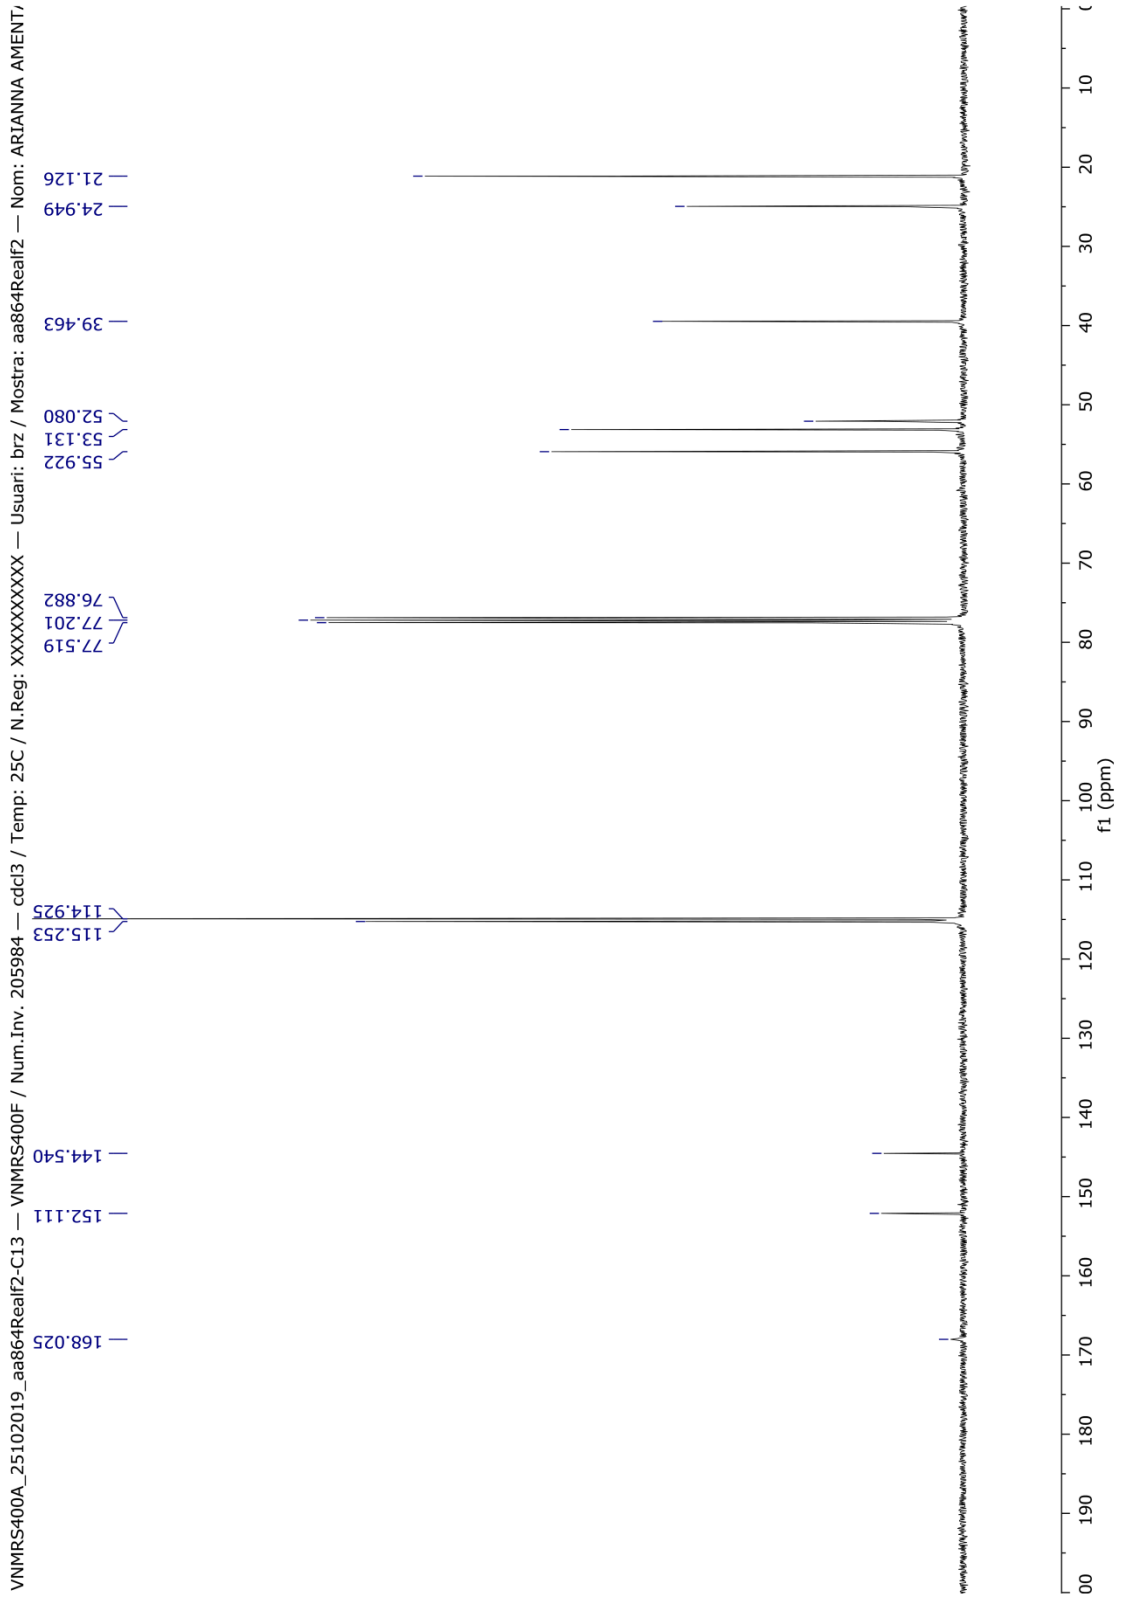

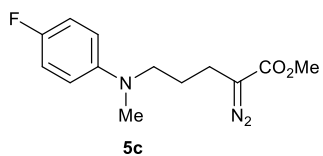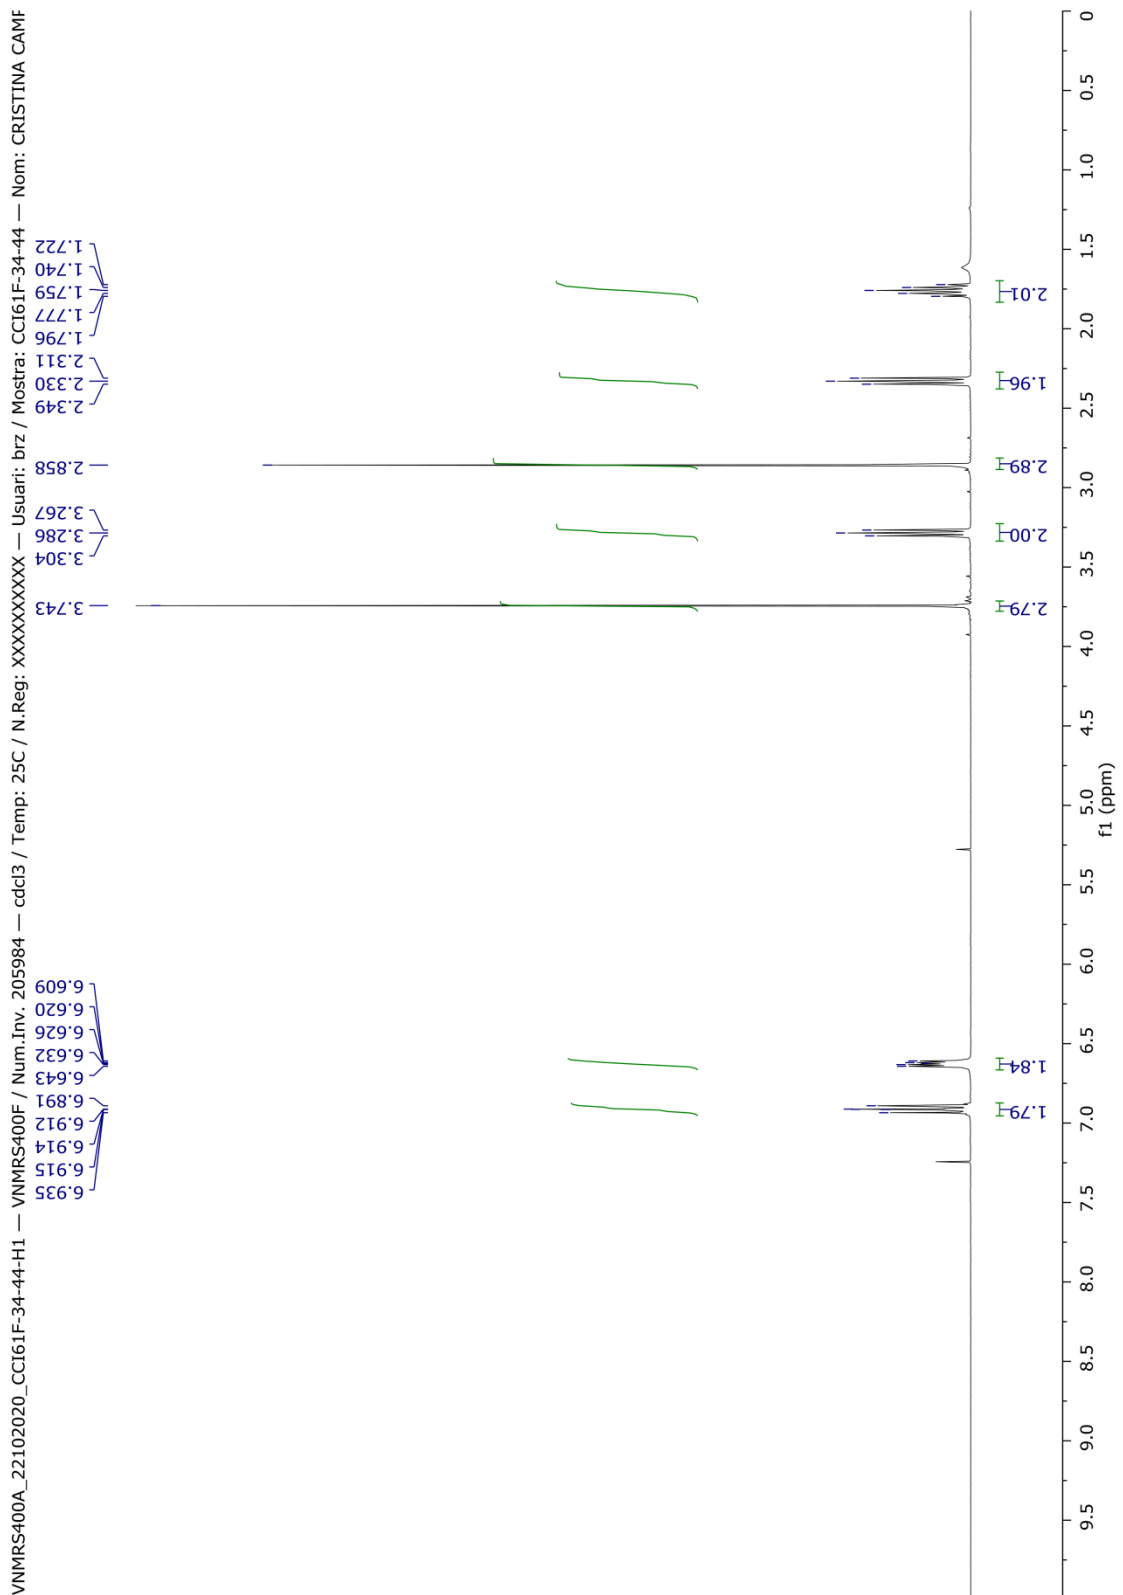

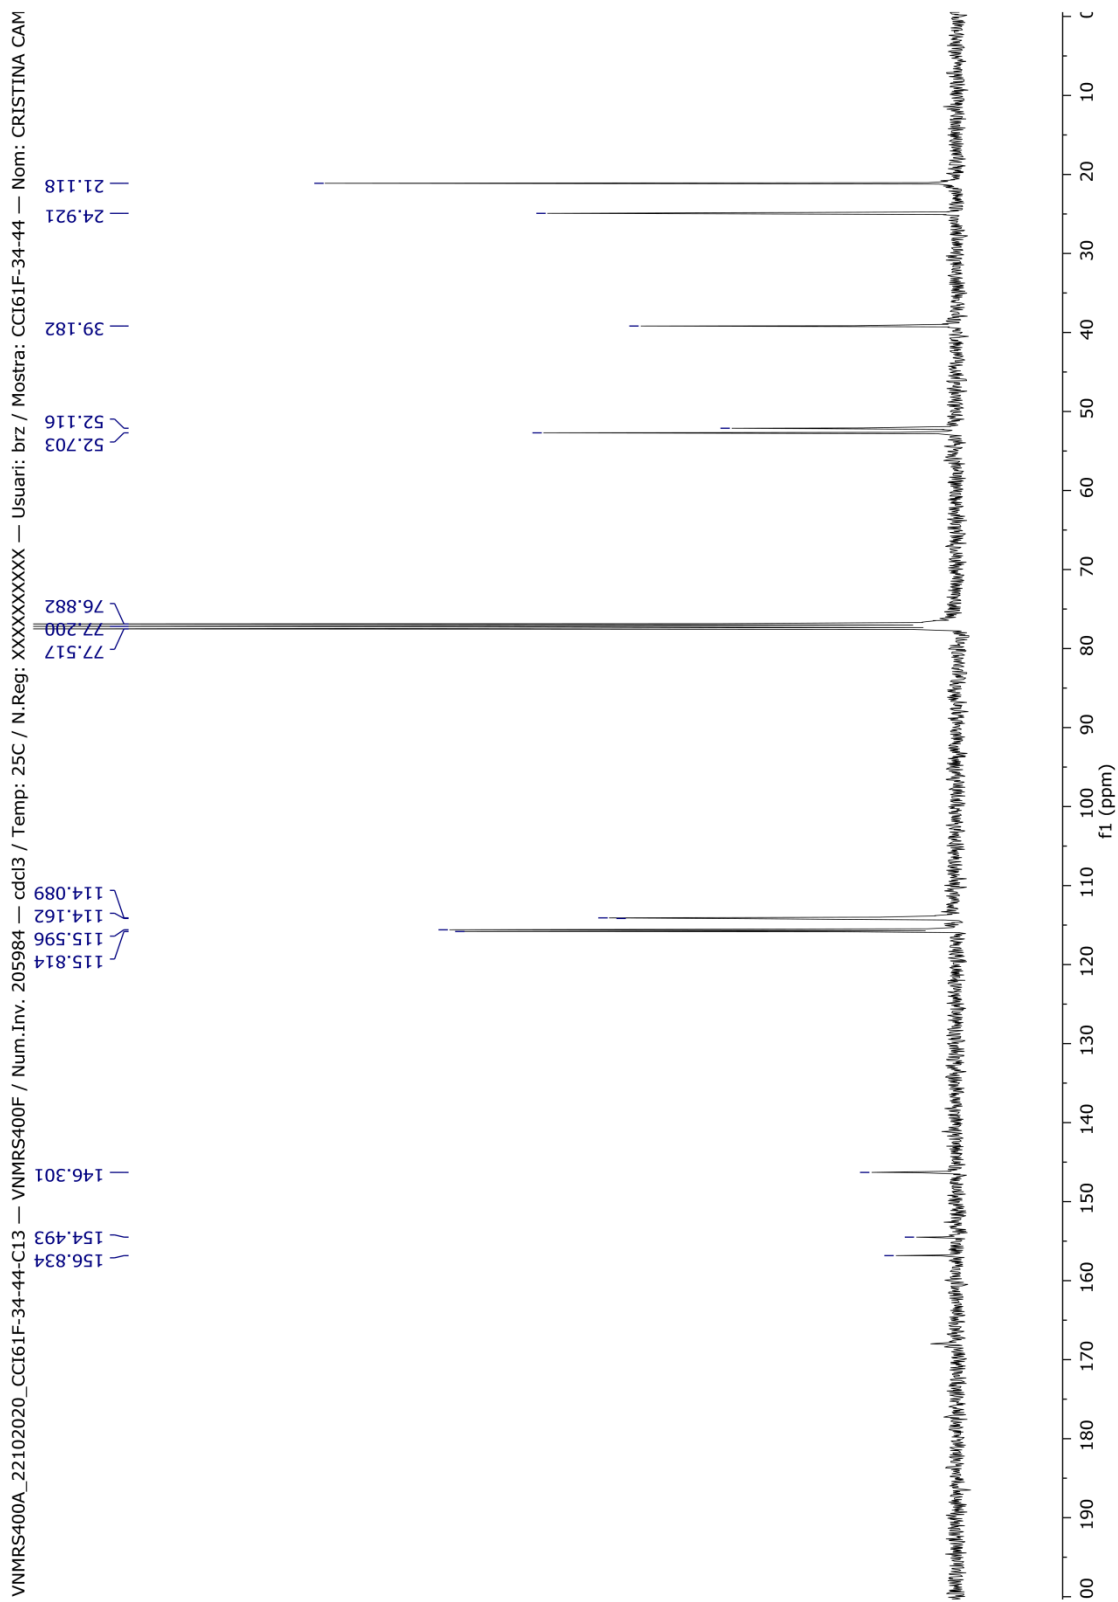

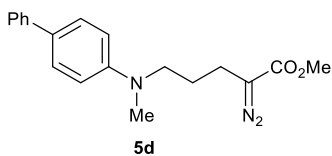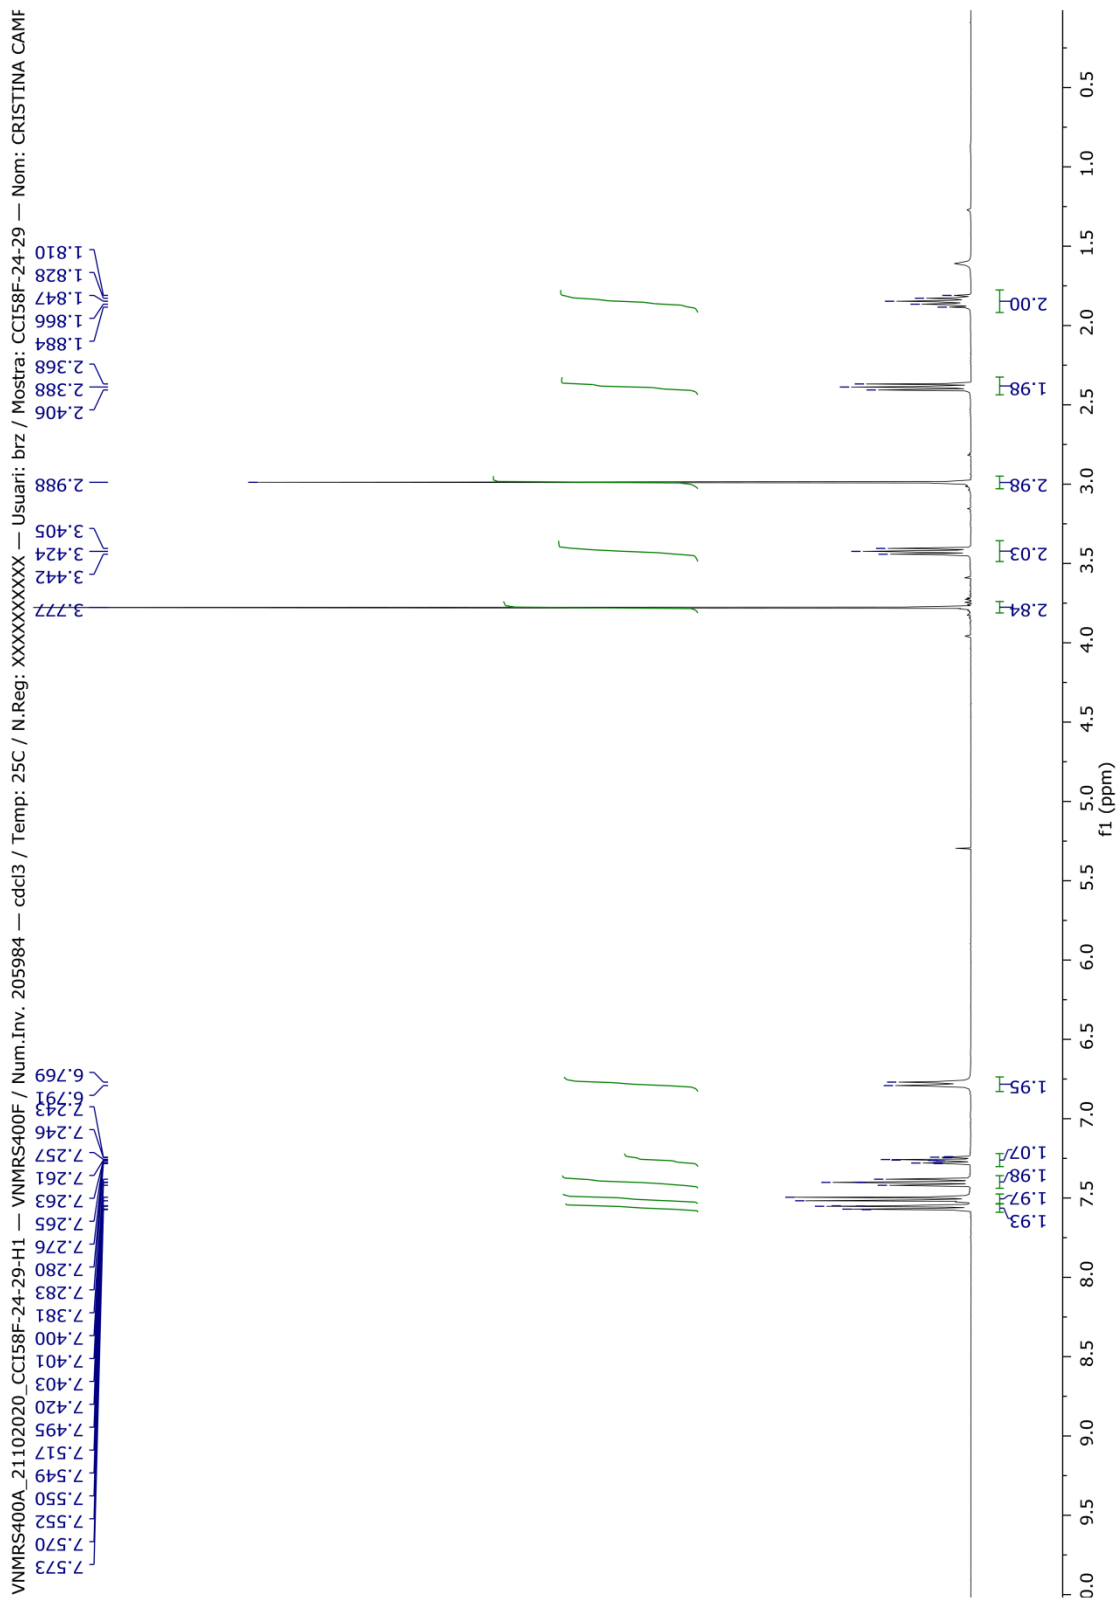



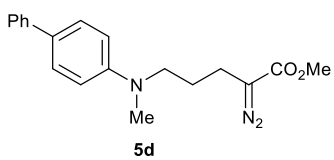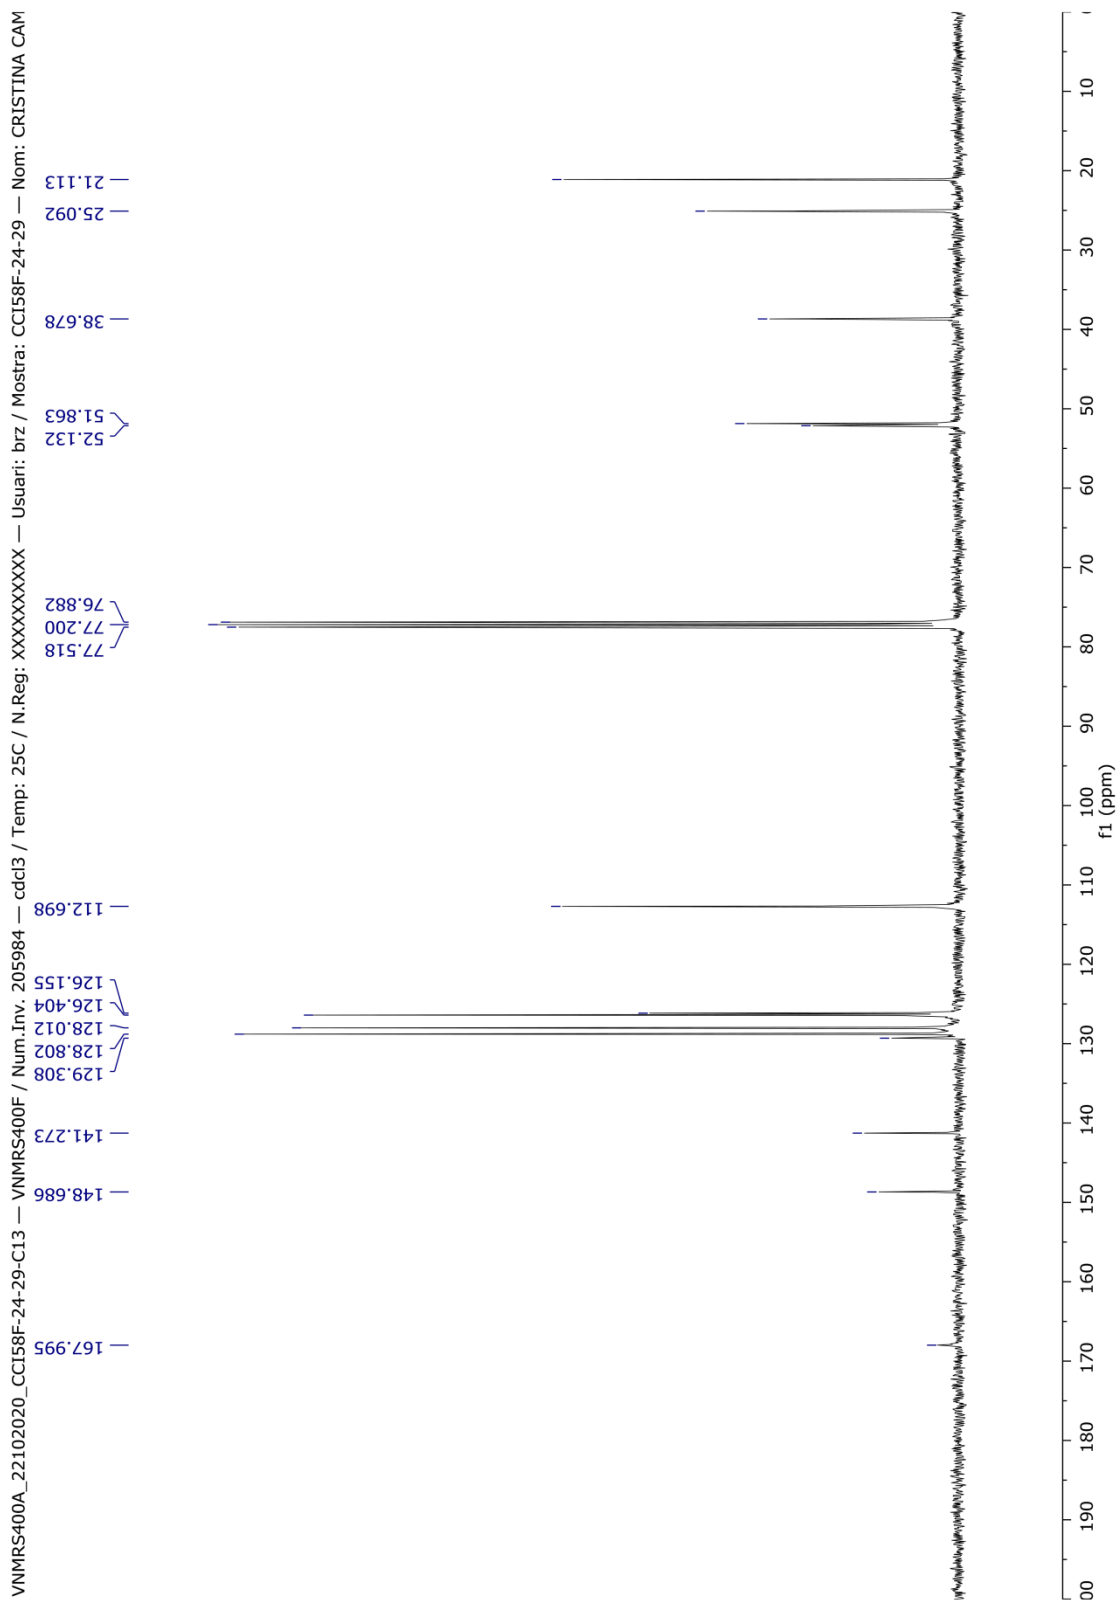

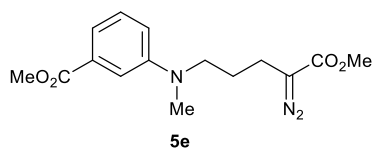

M400AFF\_12022020\_6CCIF48-69-H1 — M400F / Num.Inv. 1009191 — cdc13 / Temp: 25C / N.Reg: XXXXXXXXXXXX — Usuari: biz / Mostra: 6CCIF48-69 — Nom: DANIEL SOLE ARJO — Data:

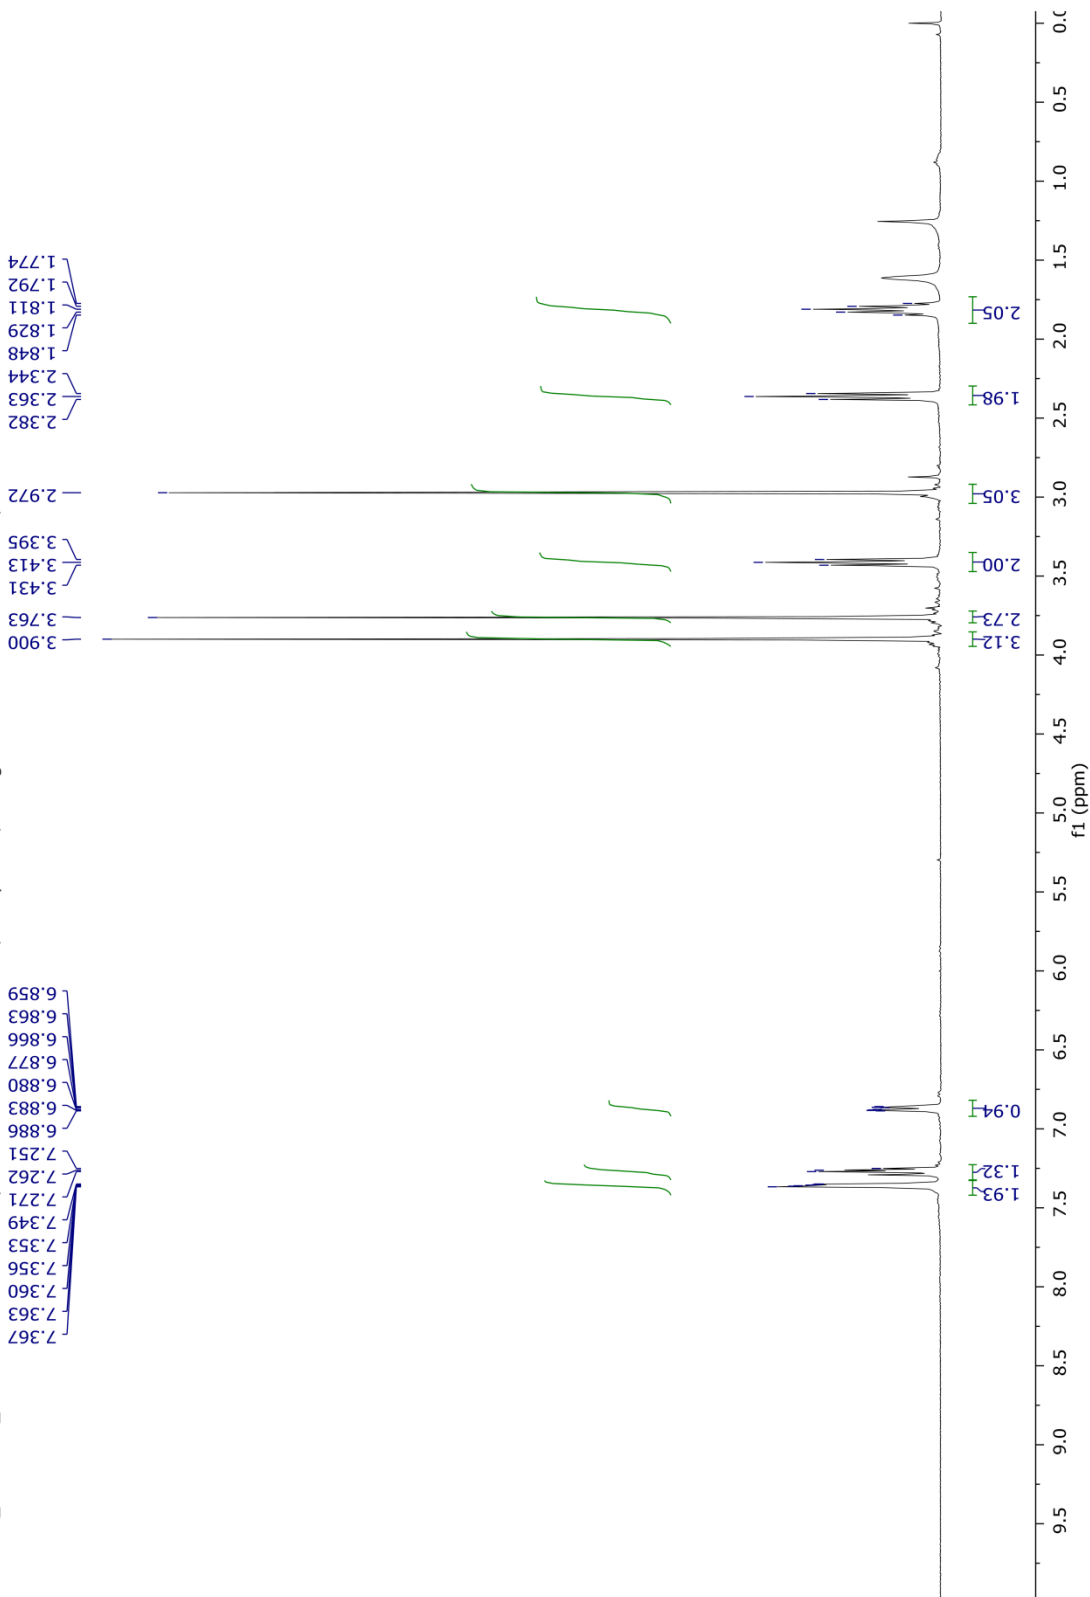

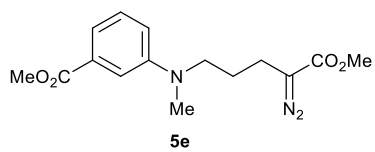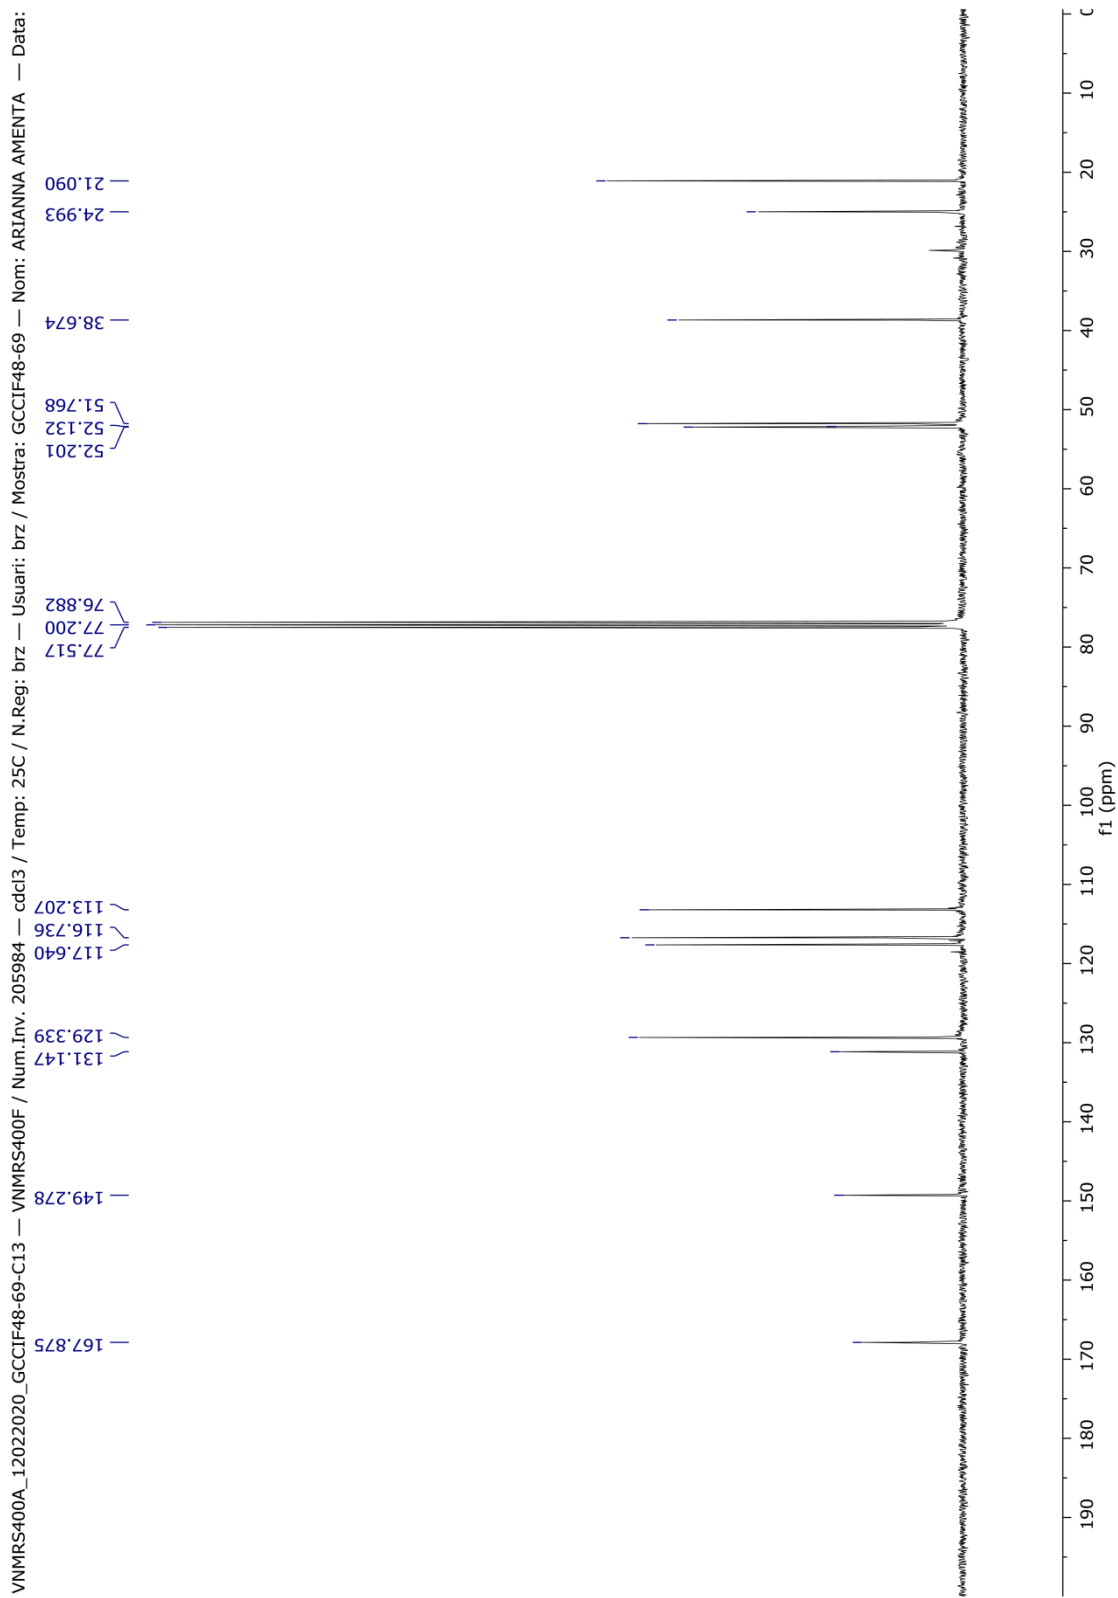

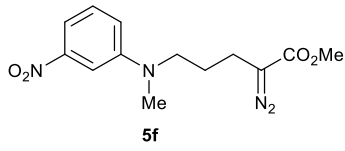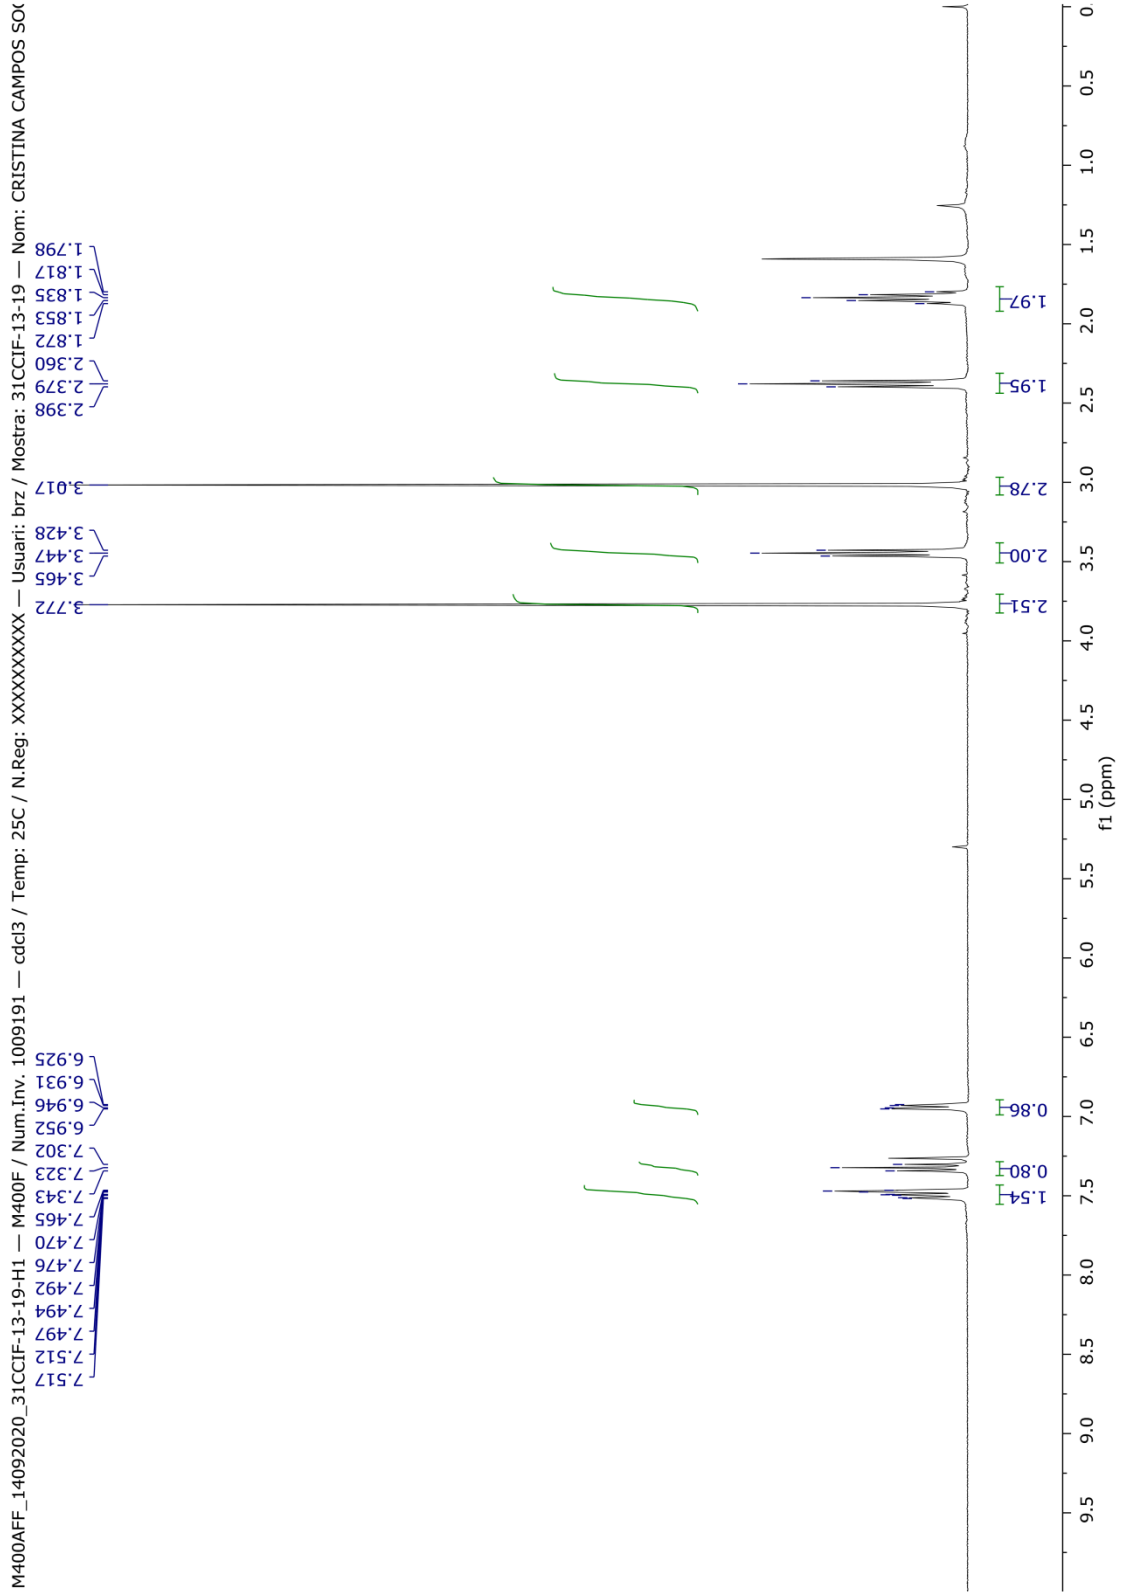

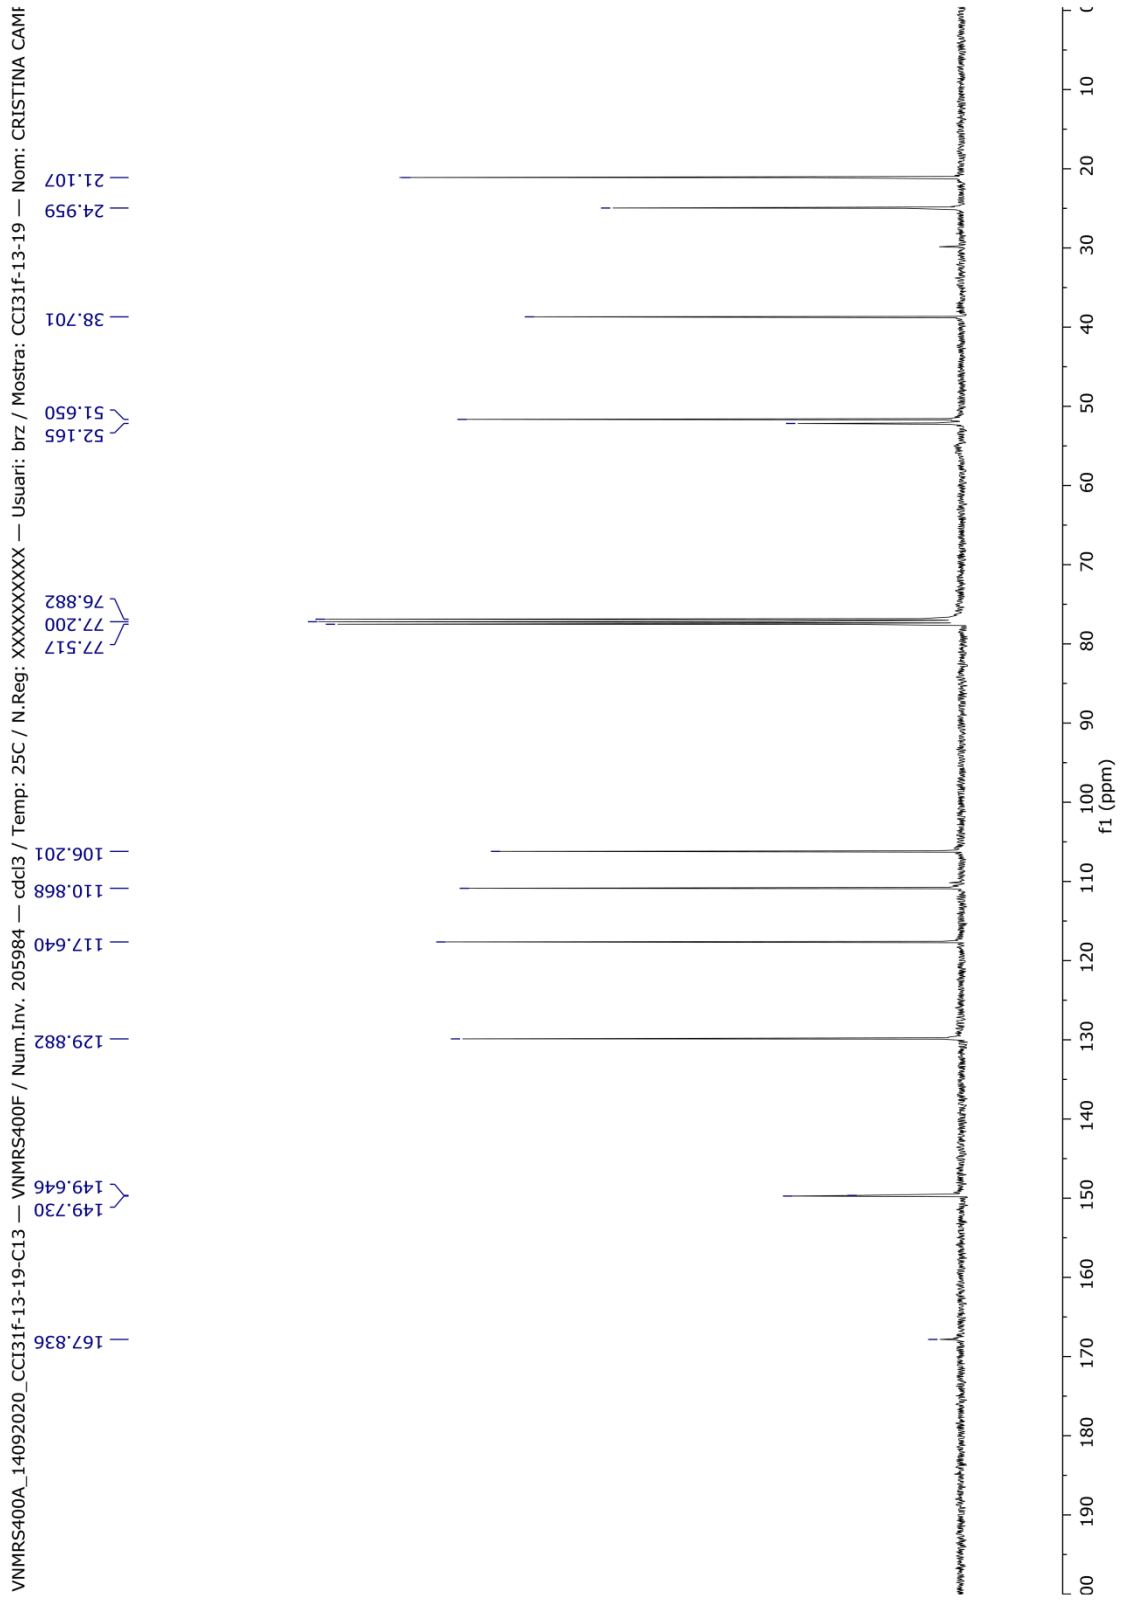

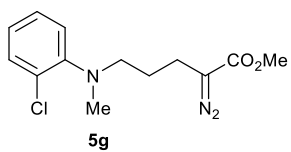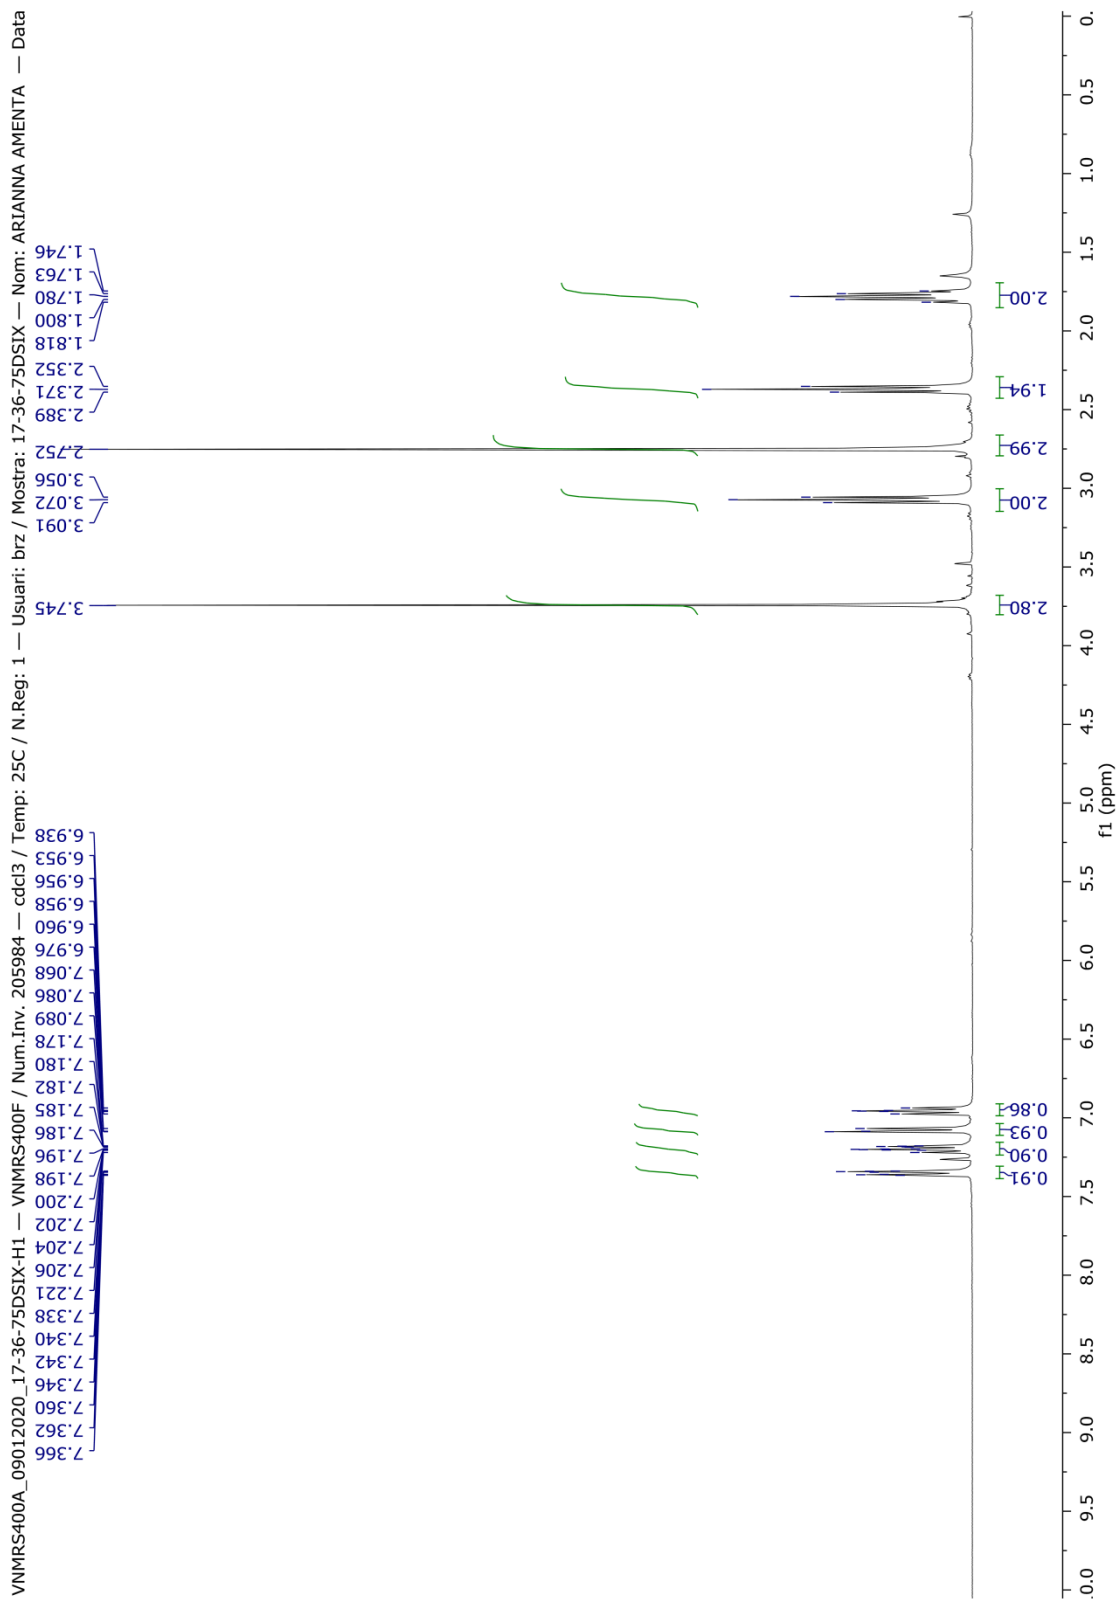

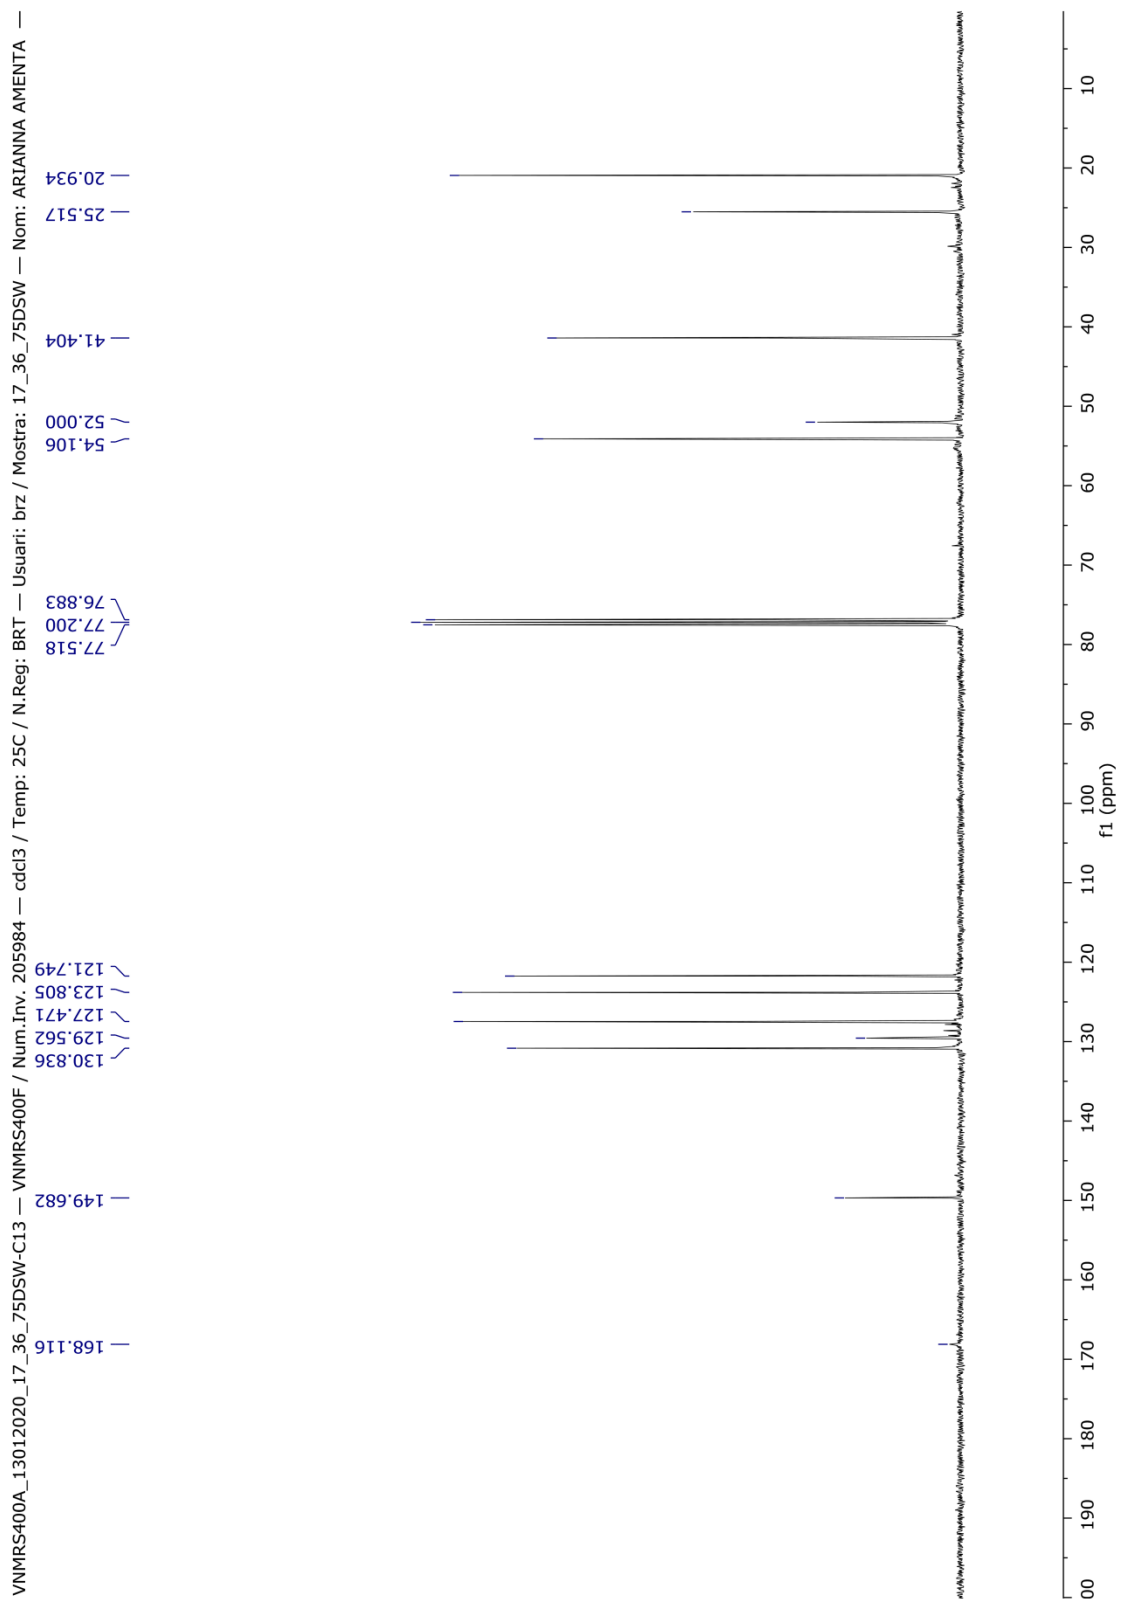

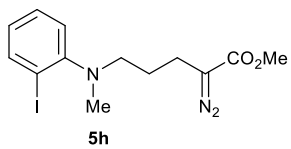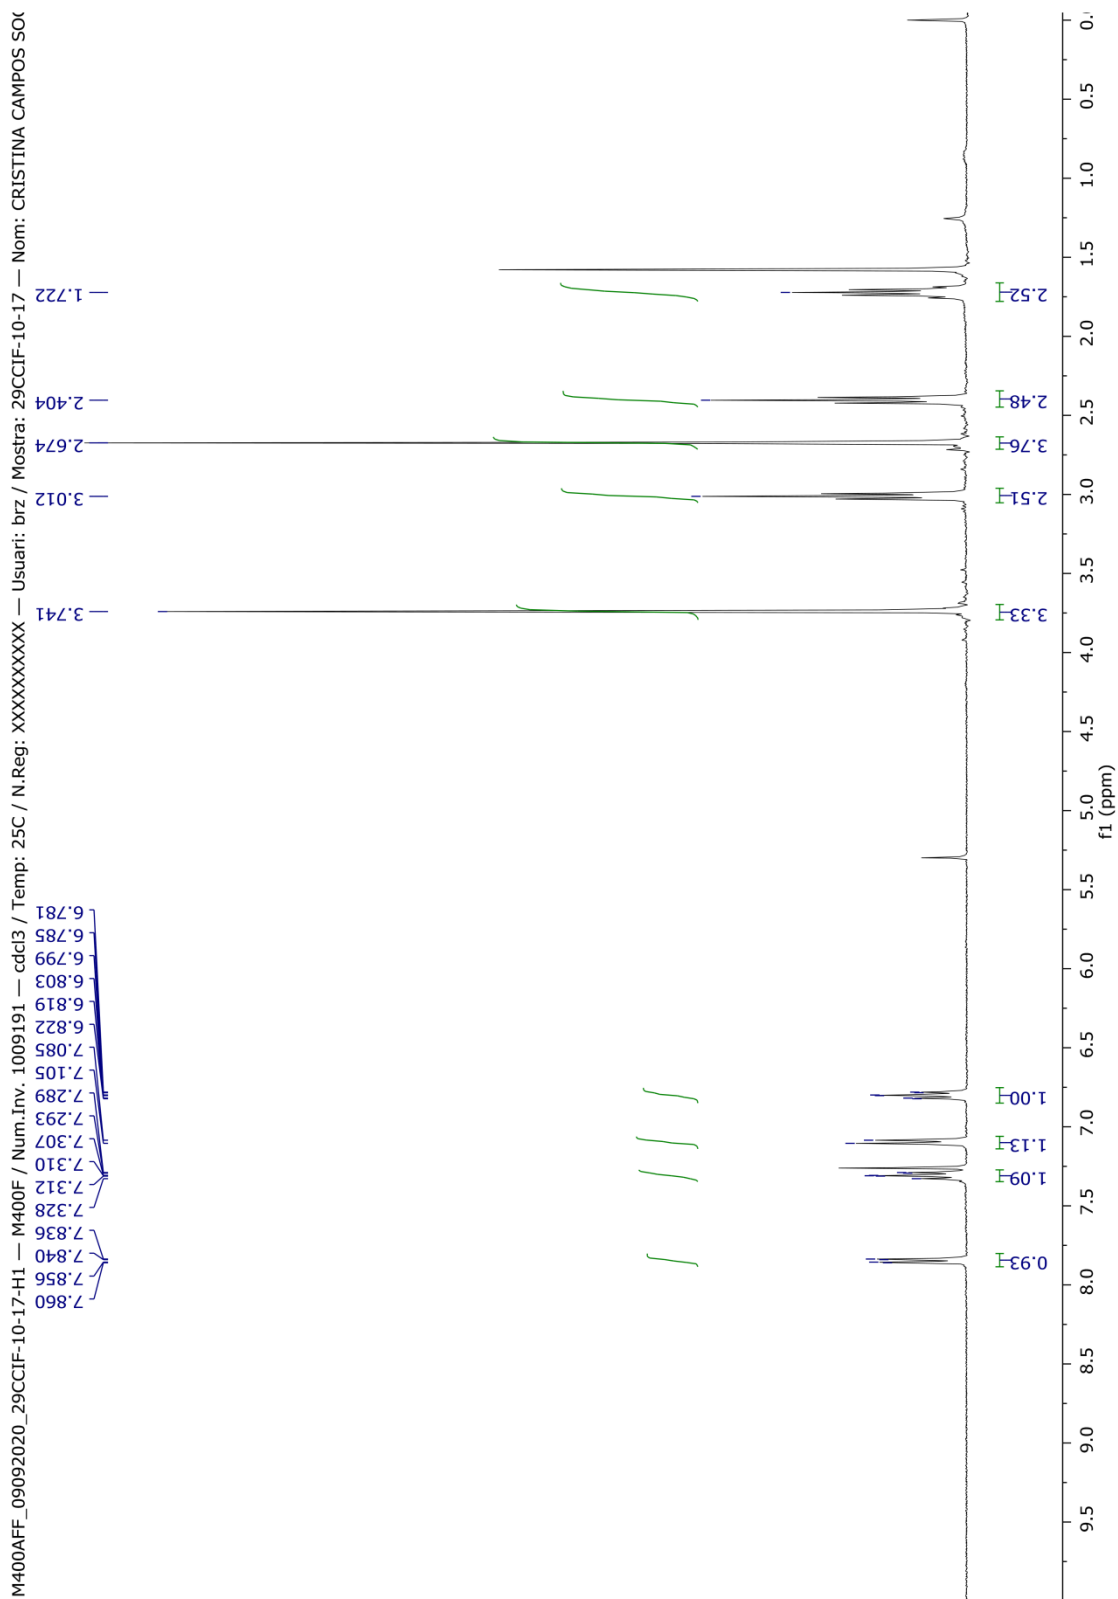



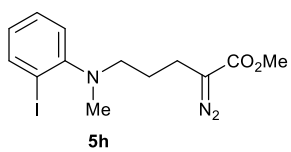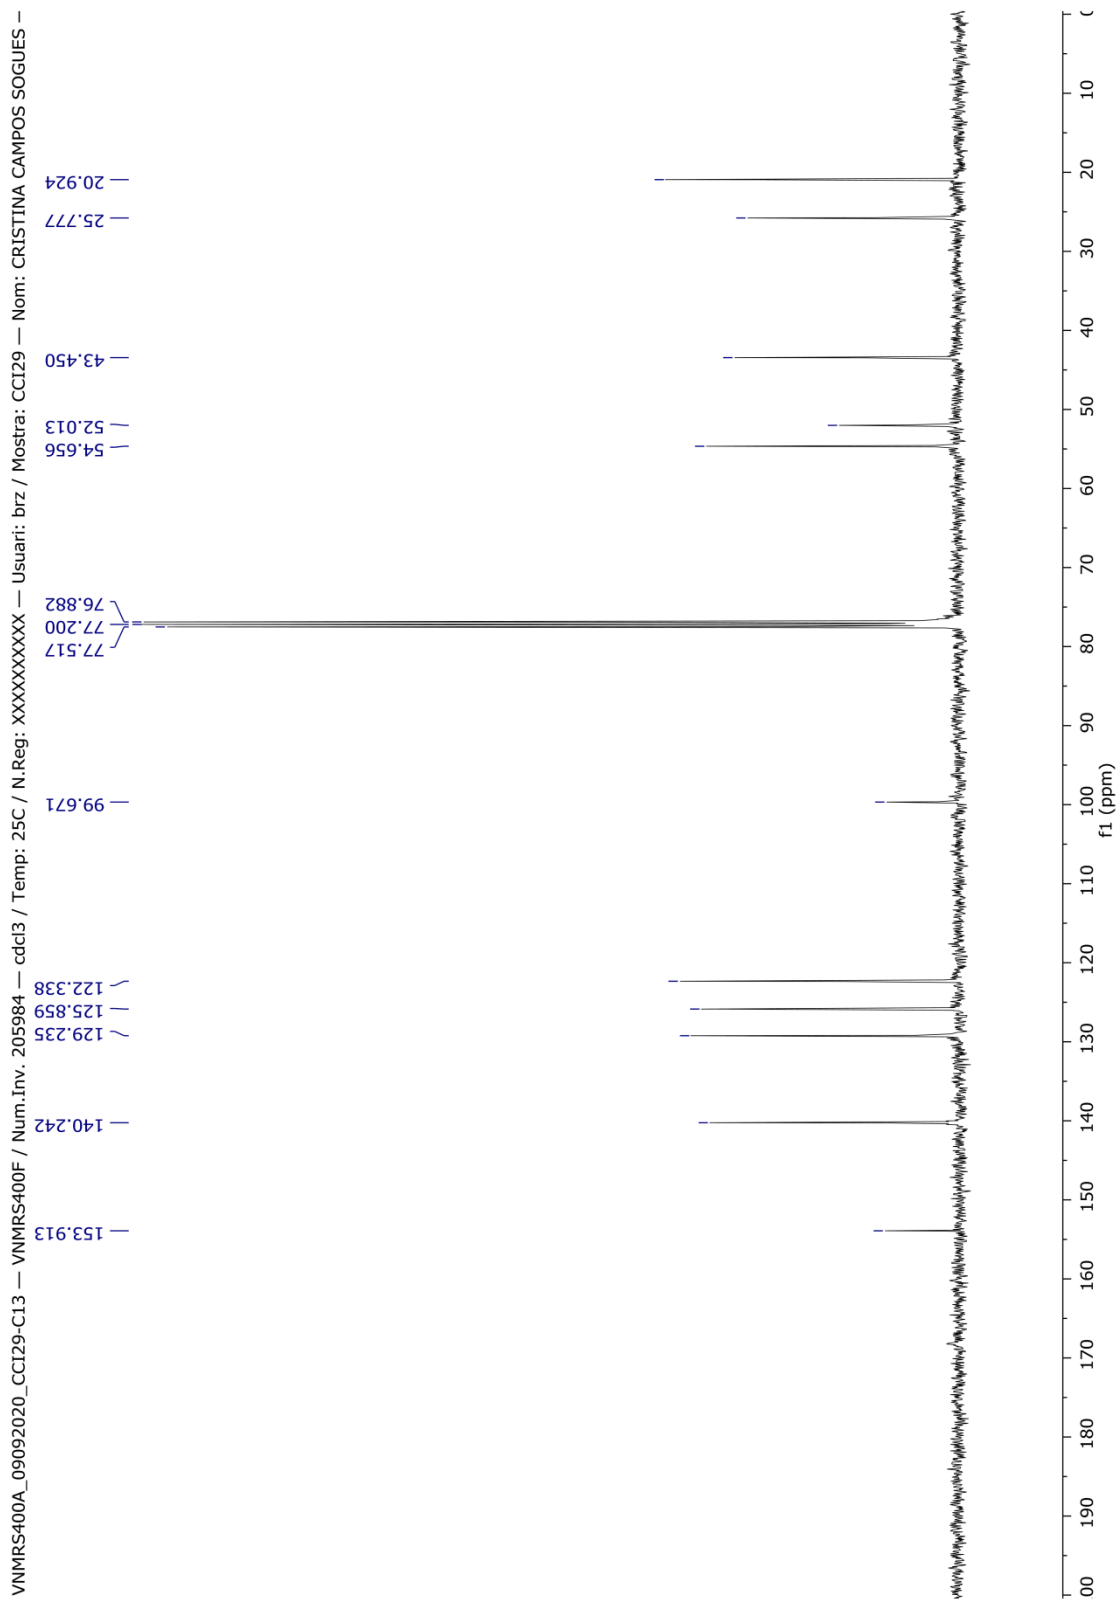

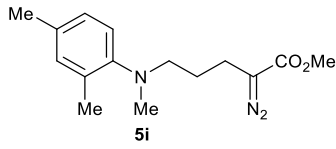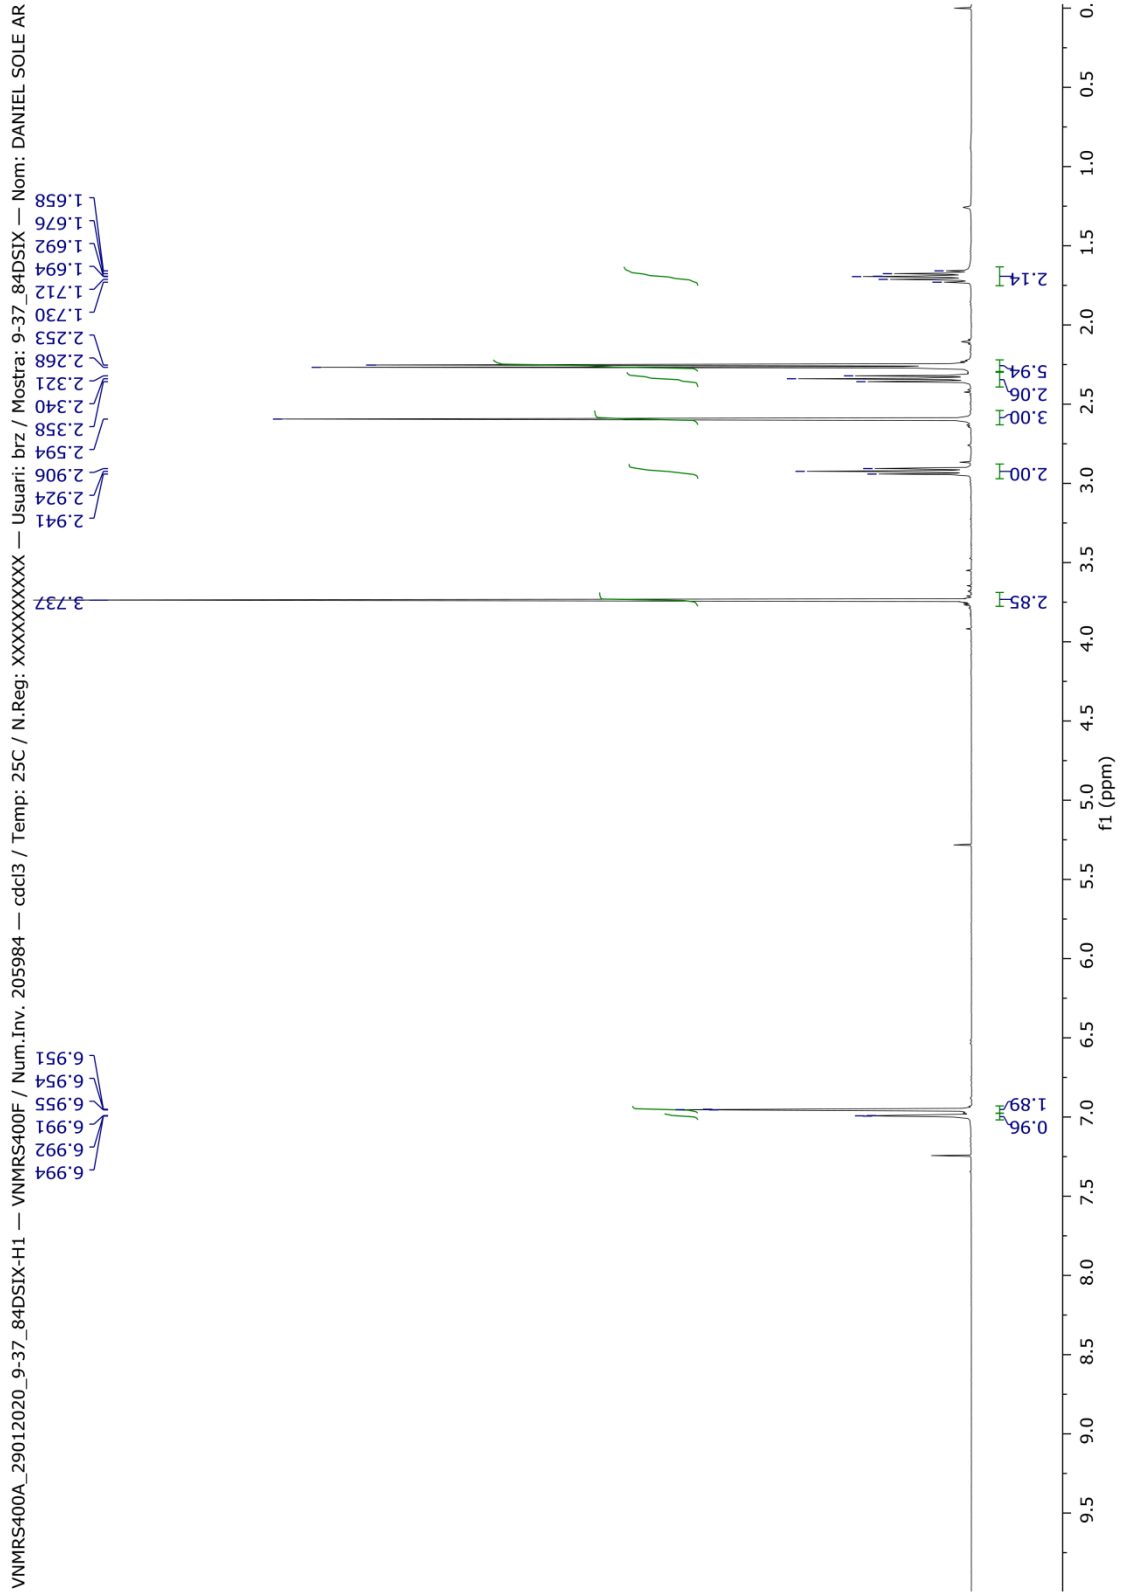

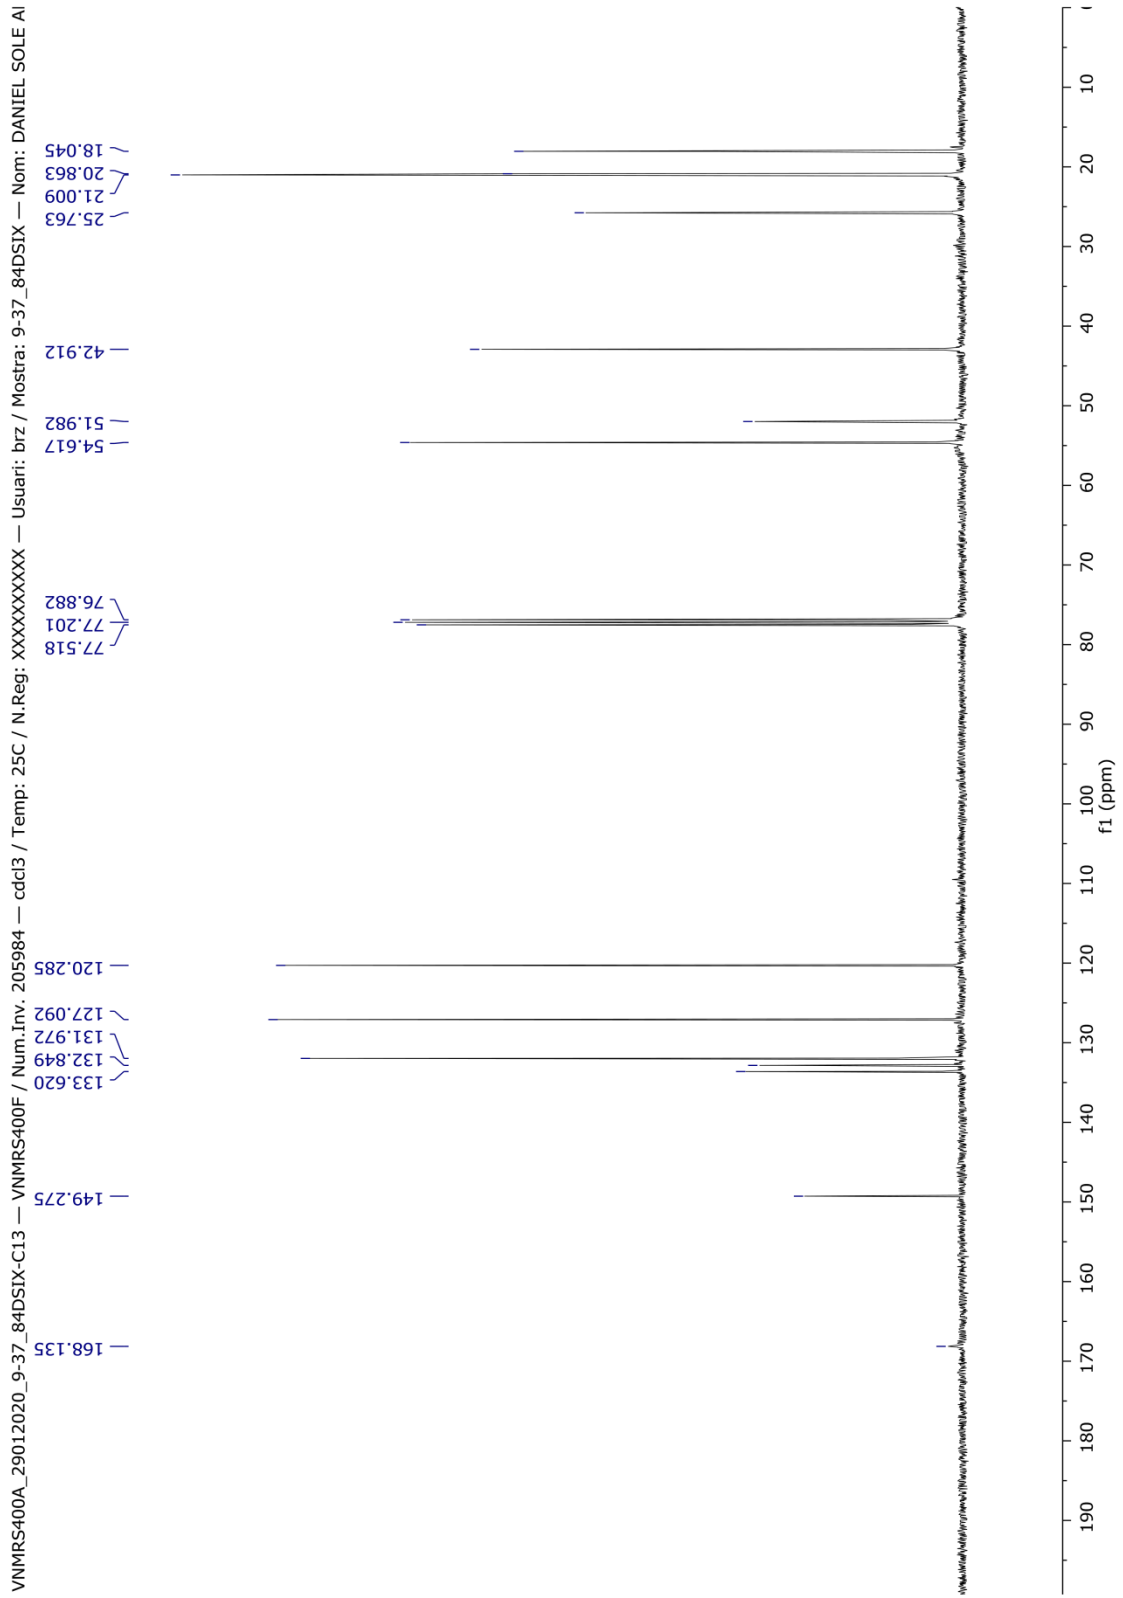

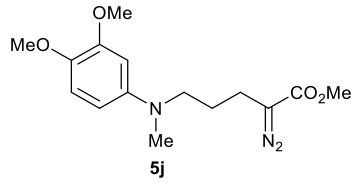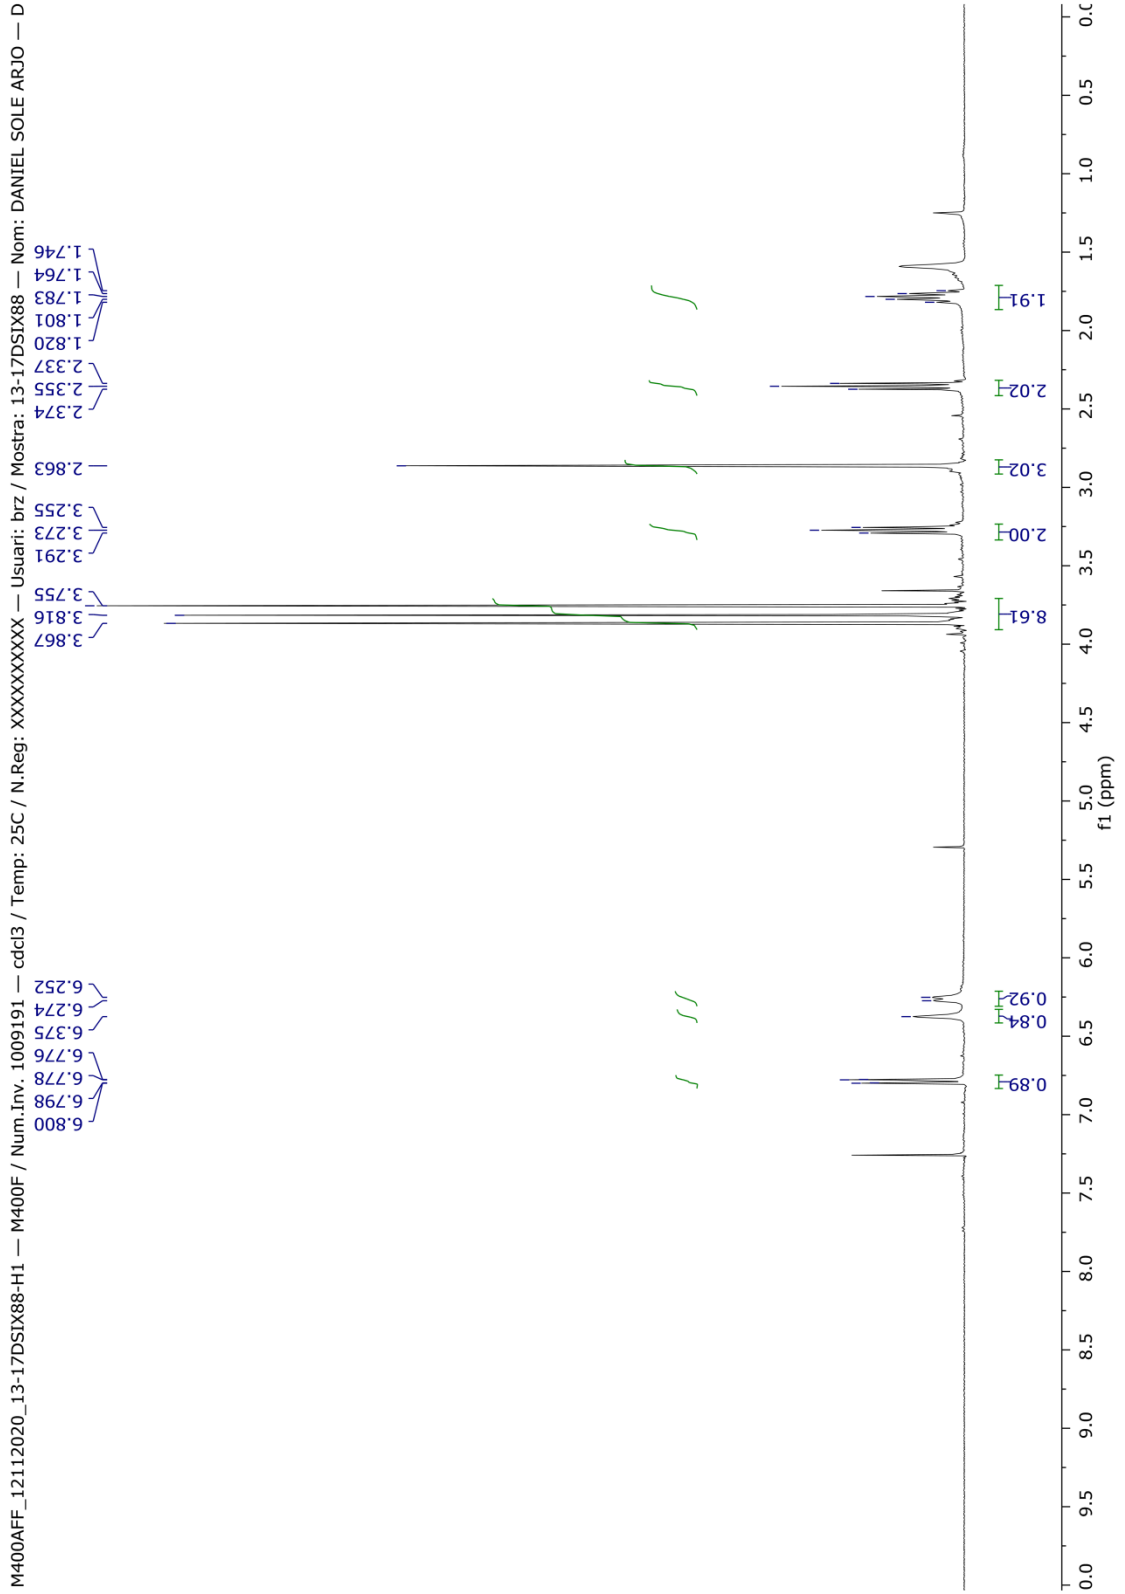

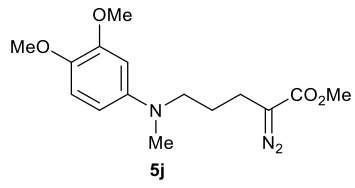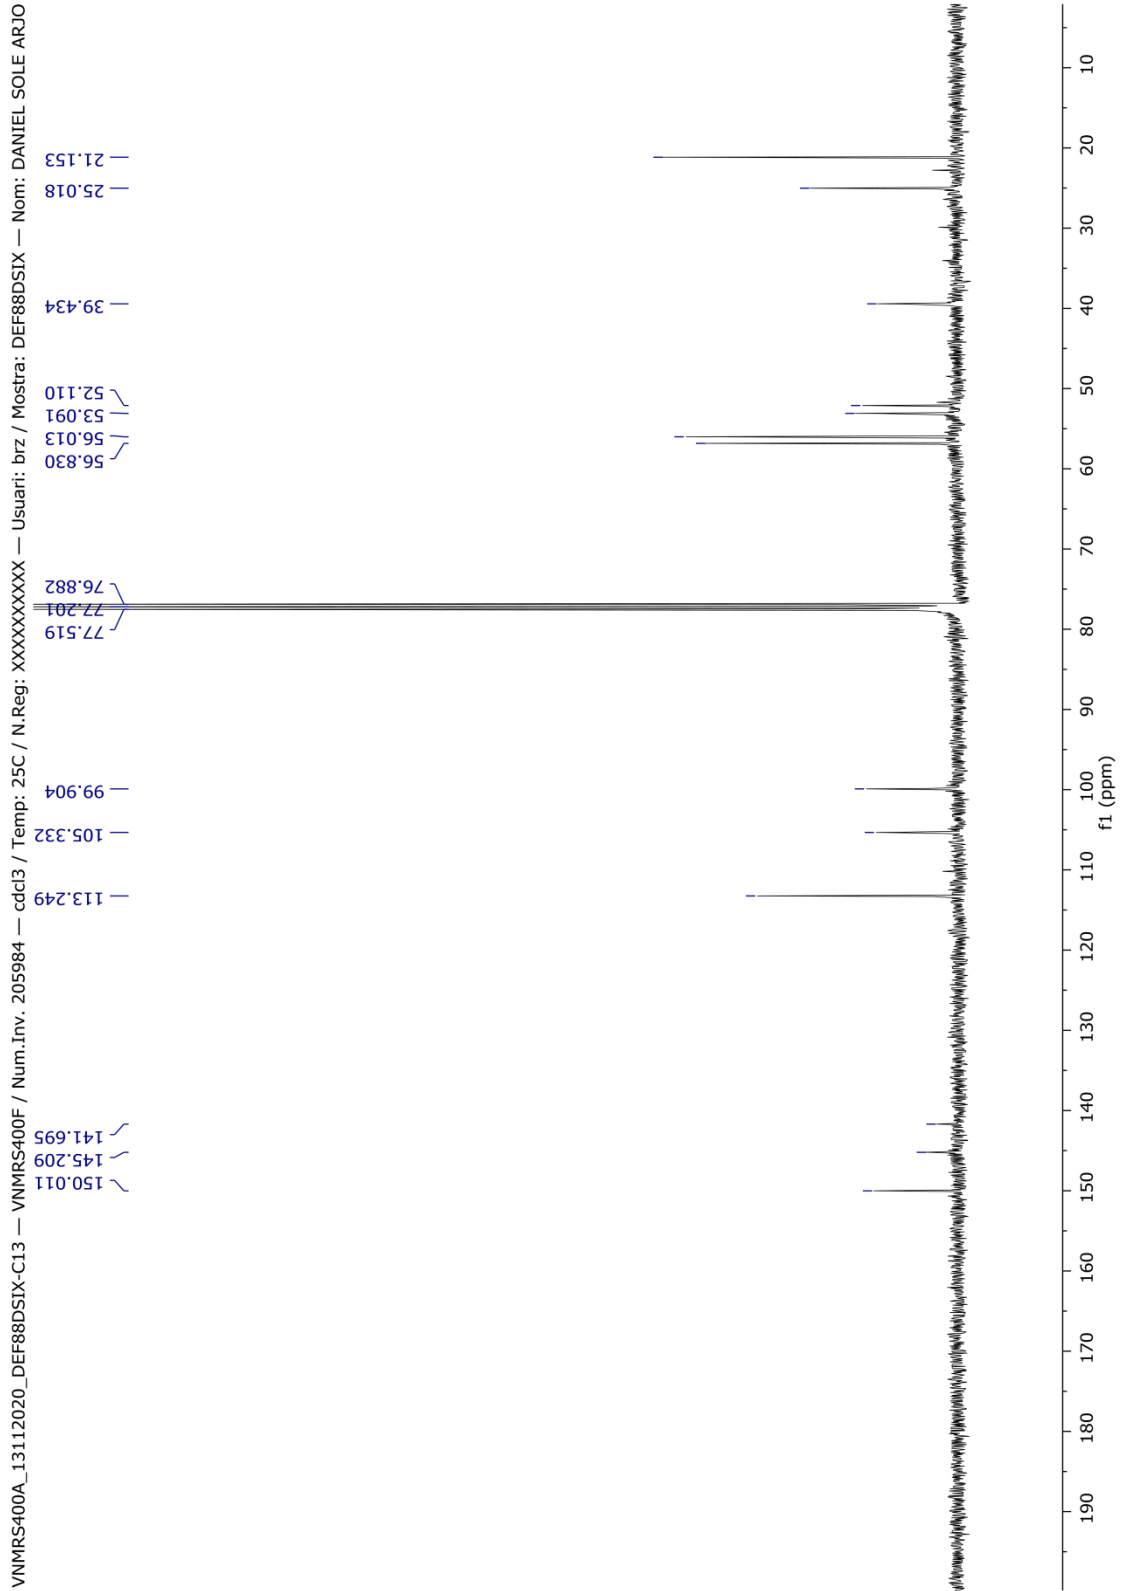

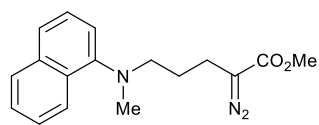

5k

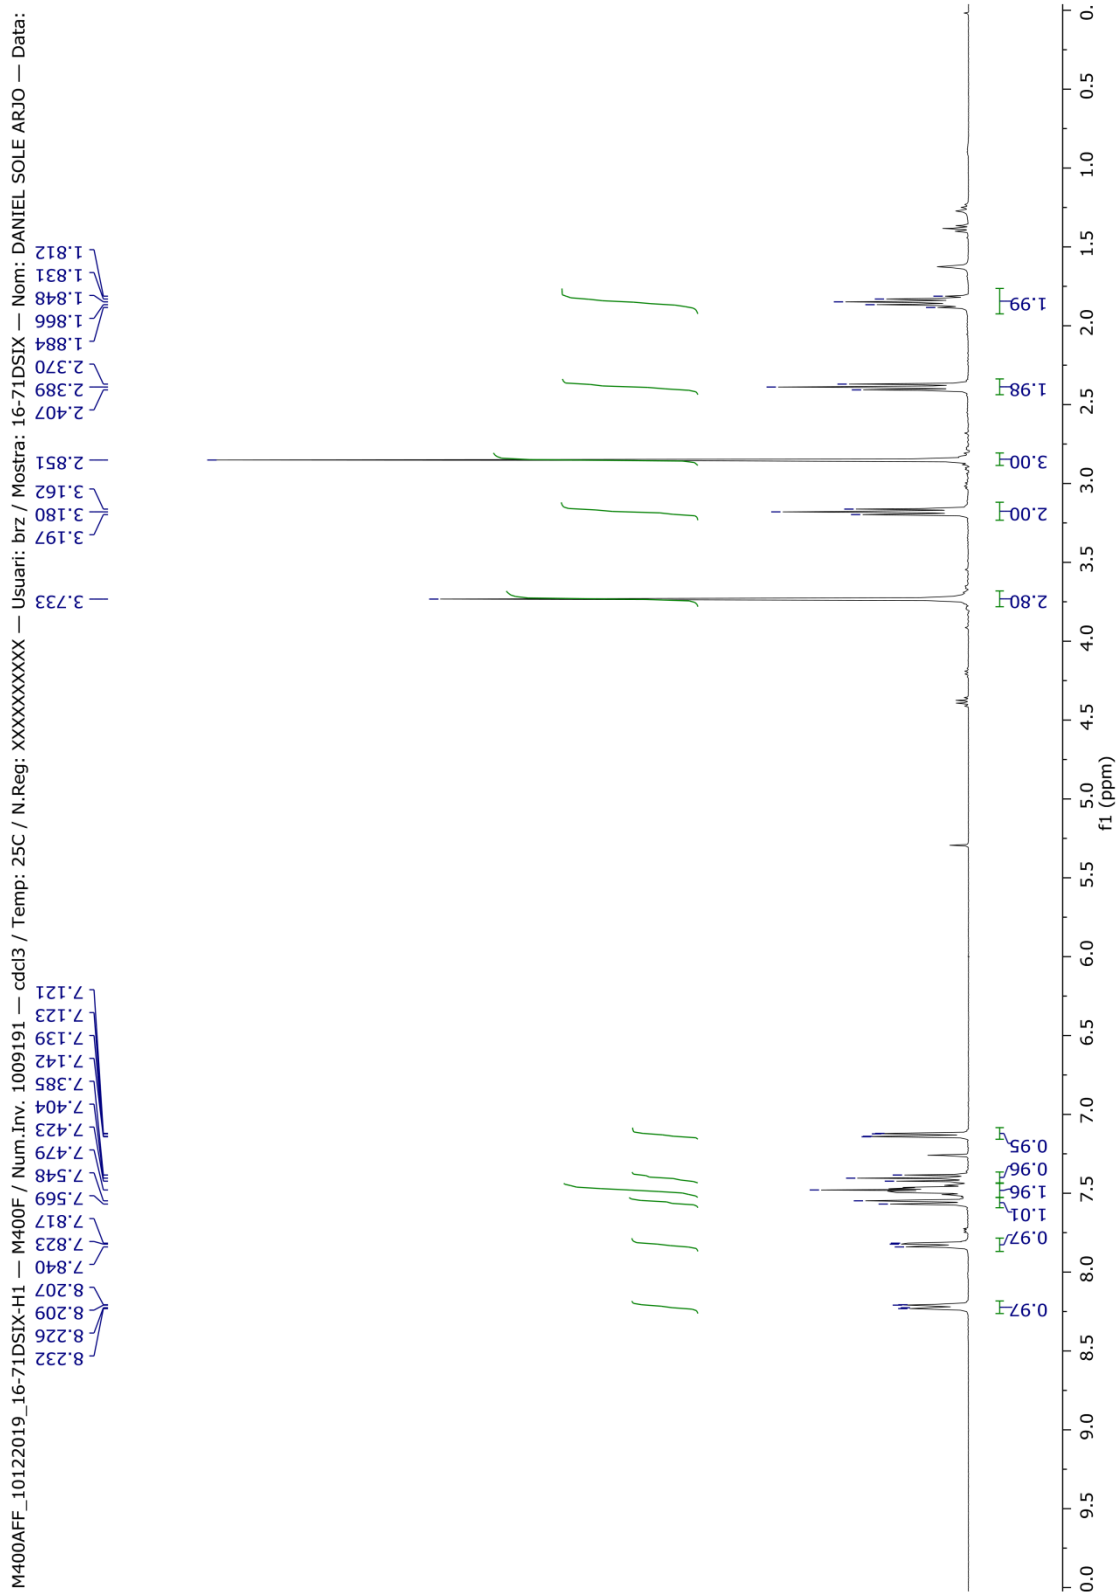

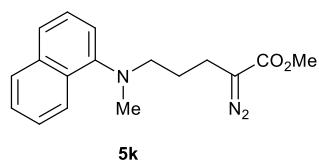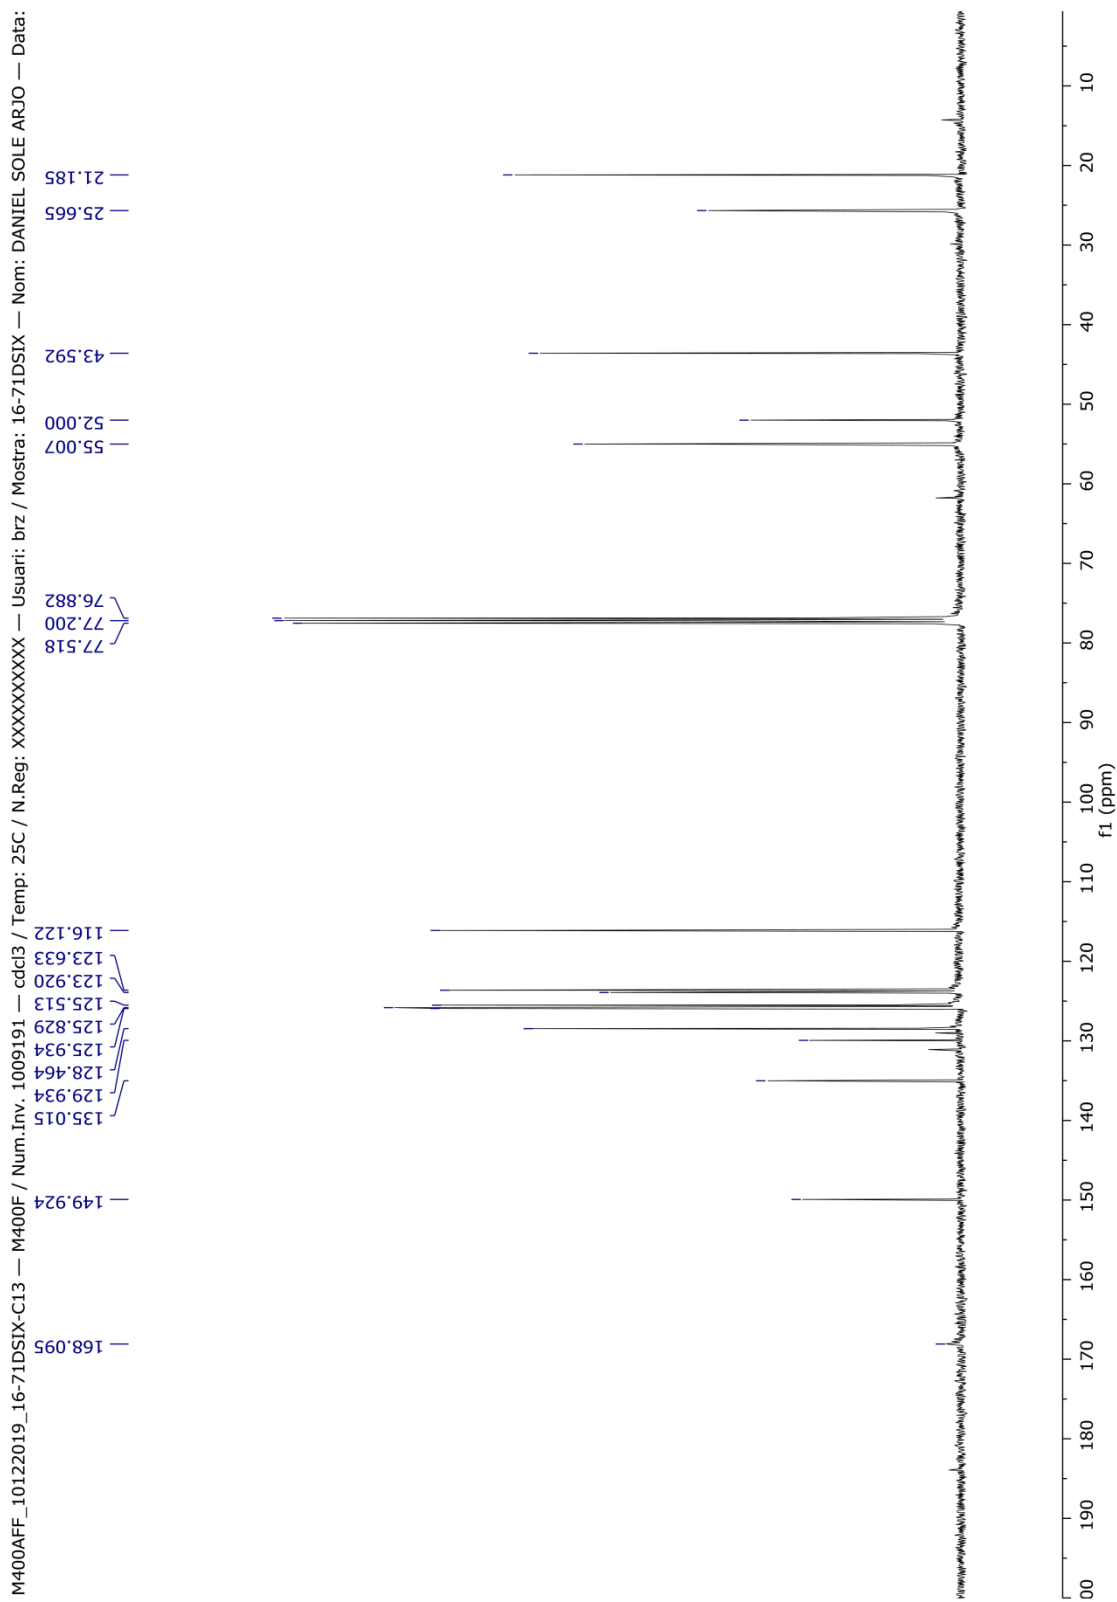

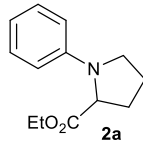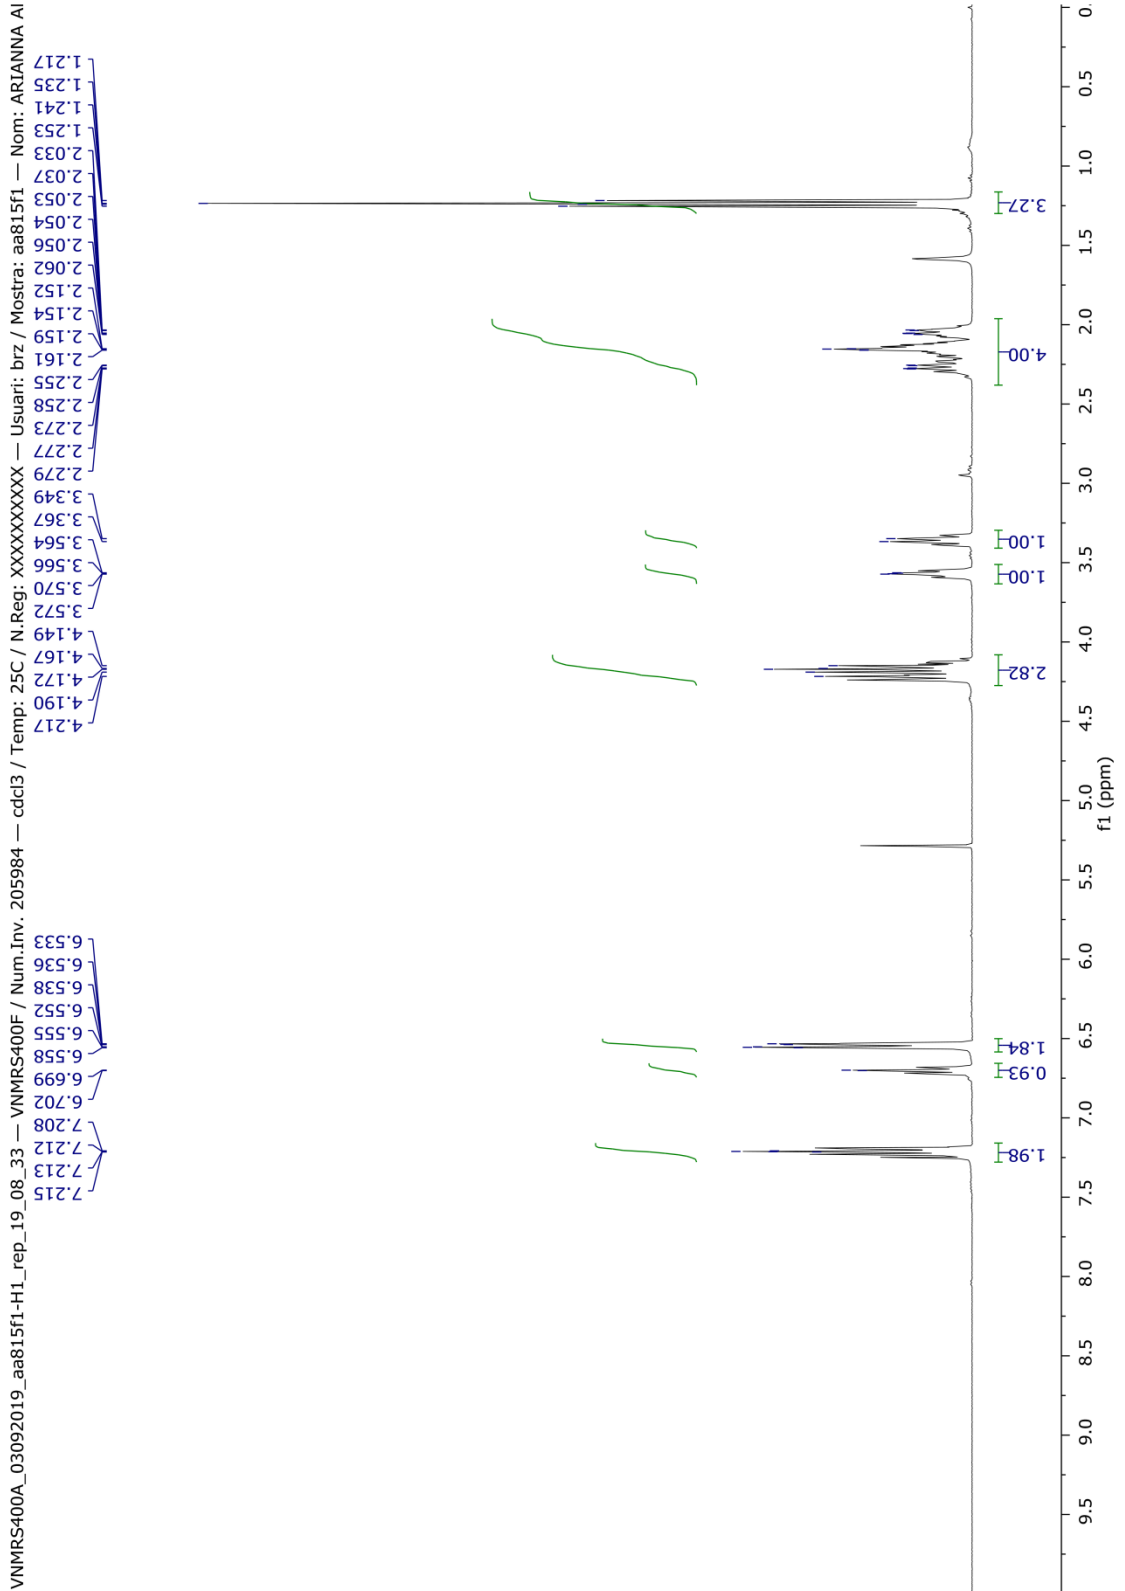



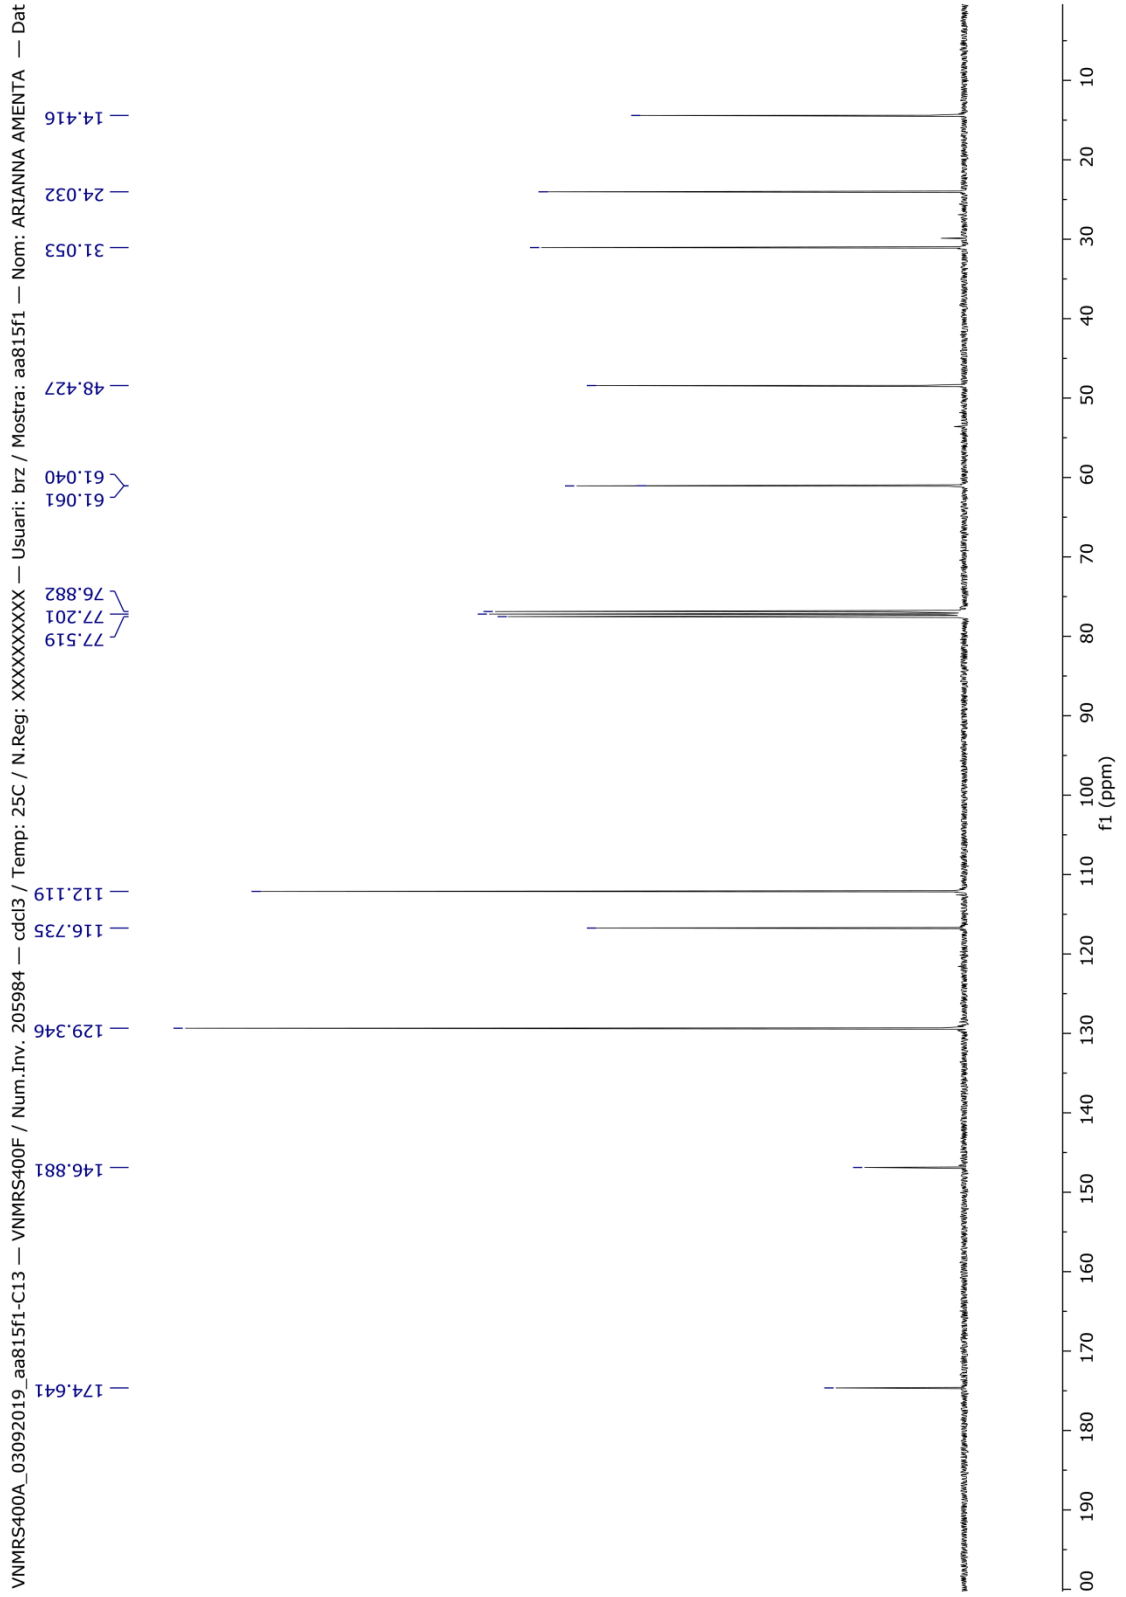

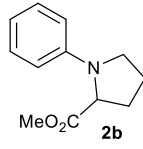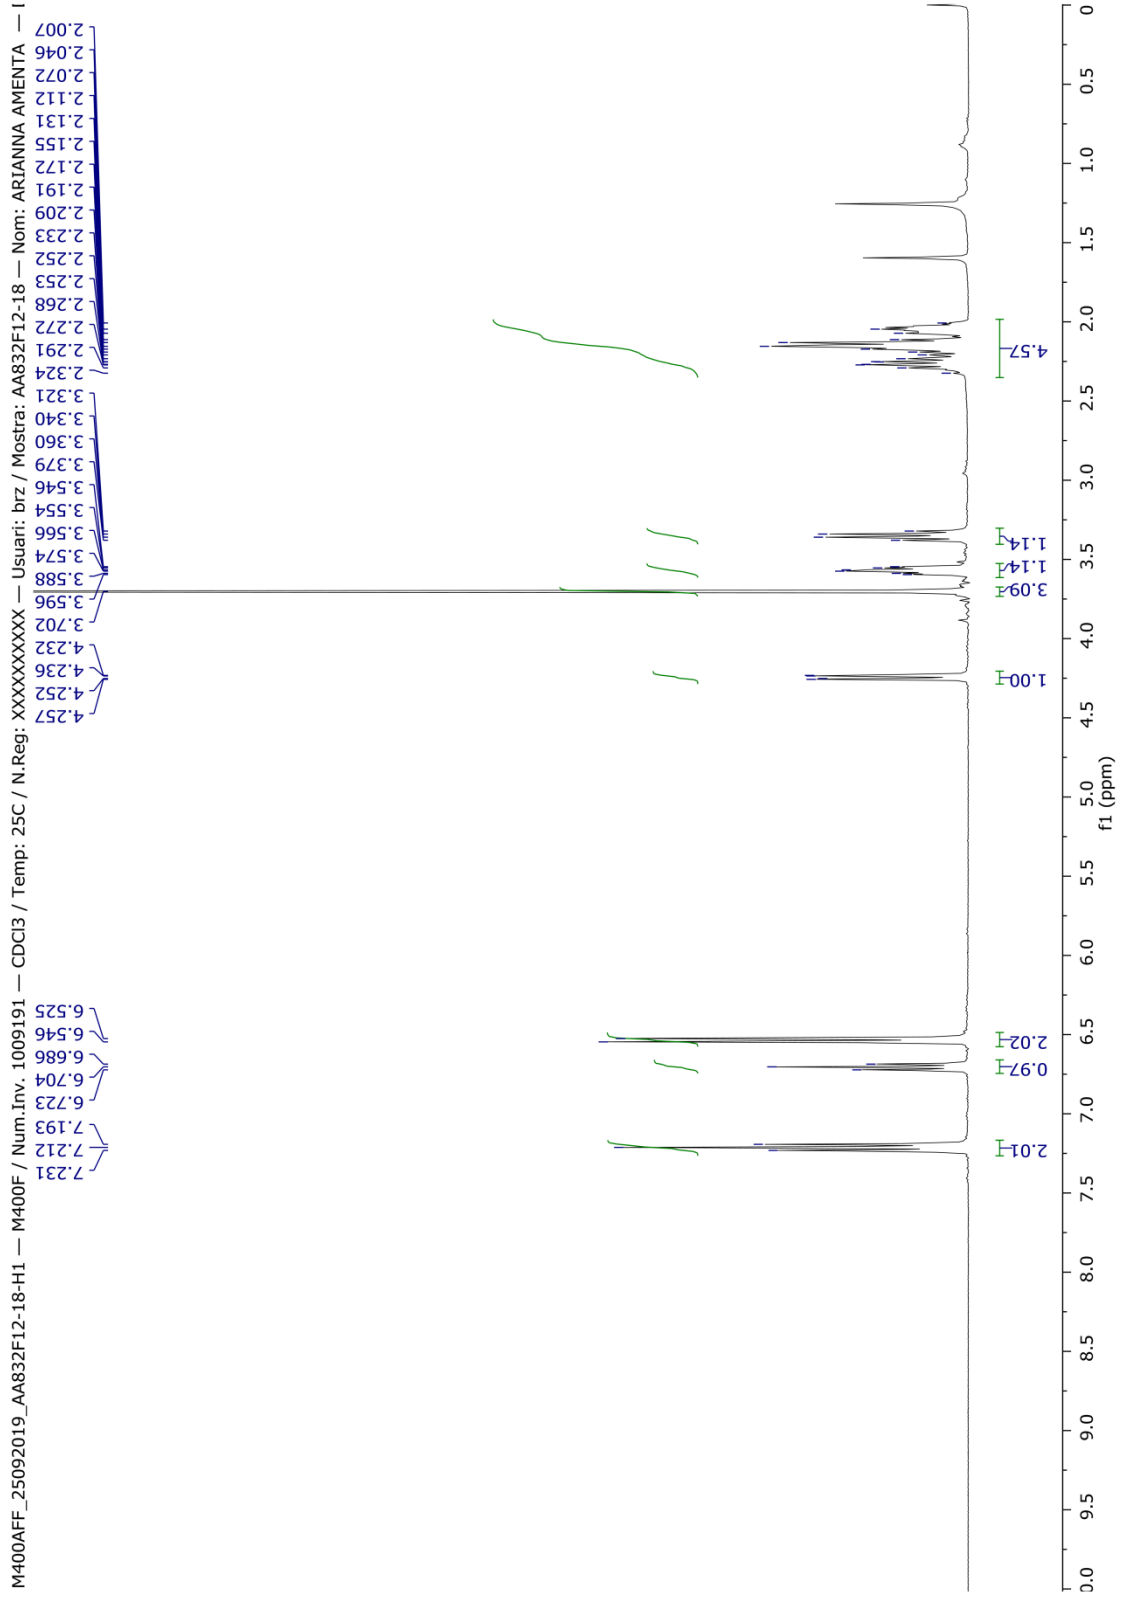

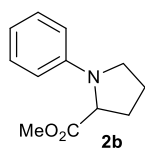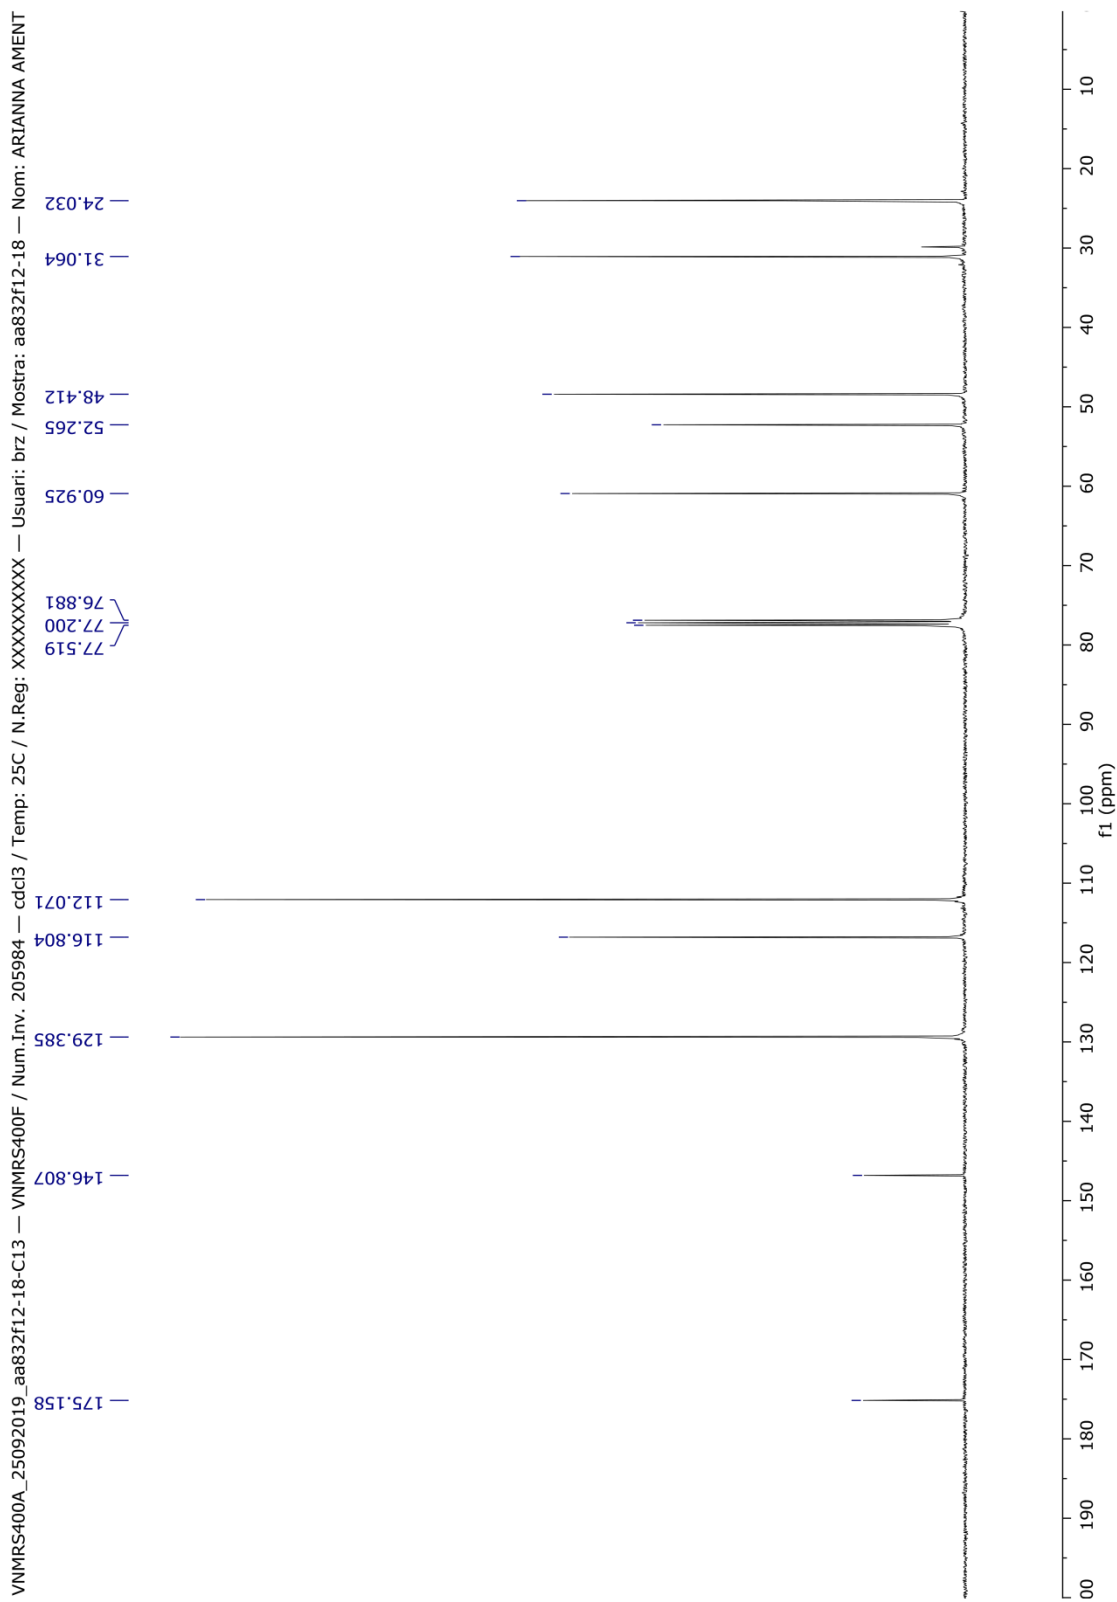

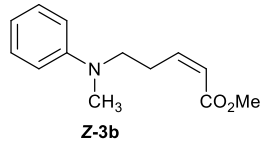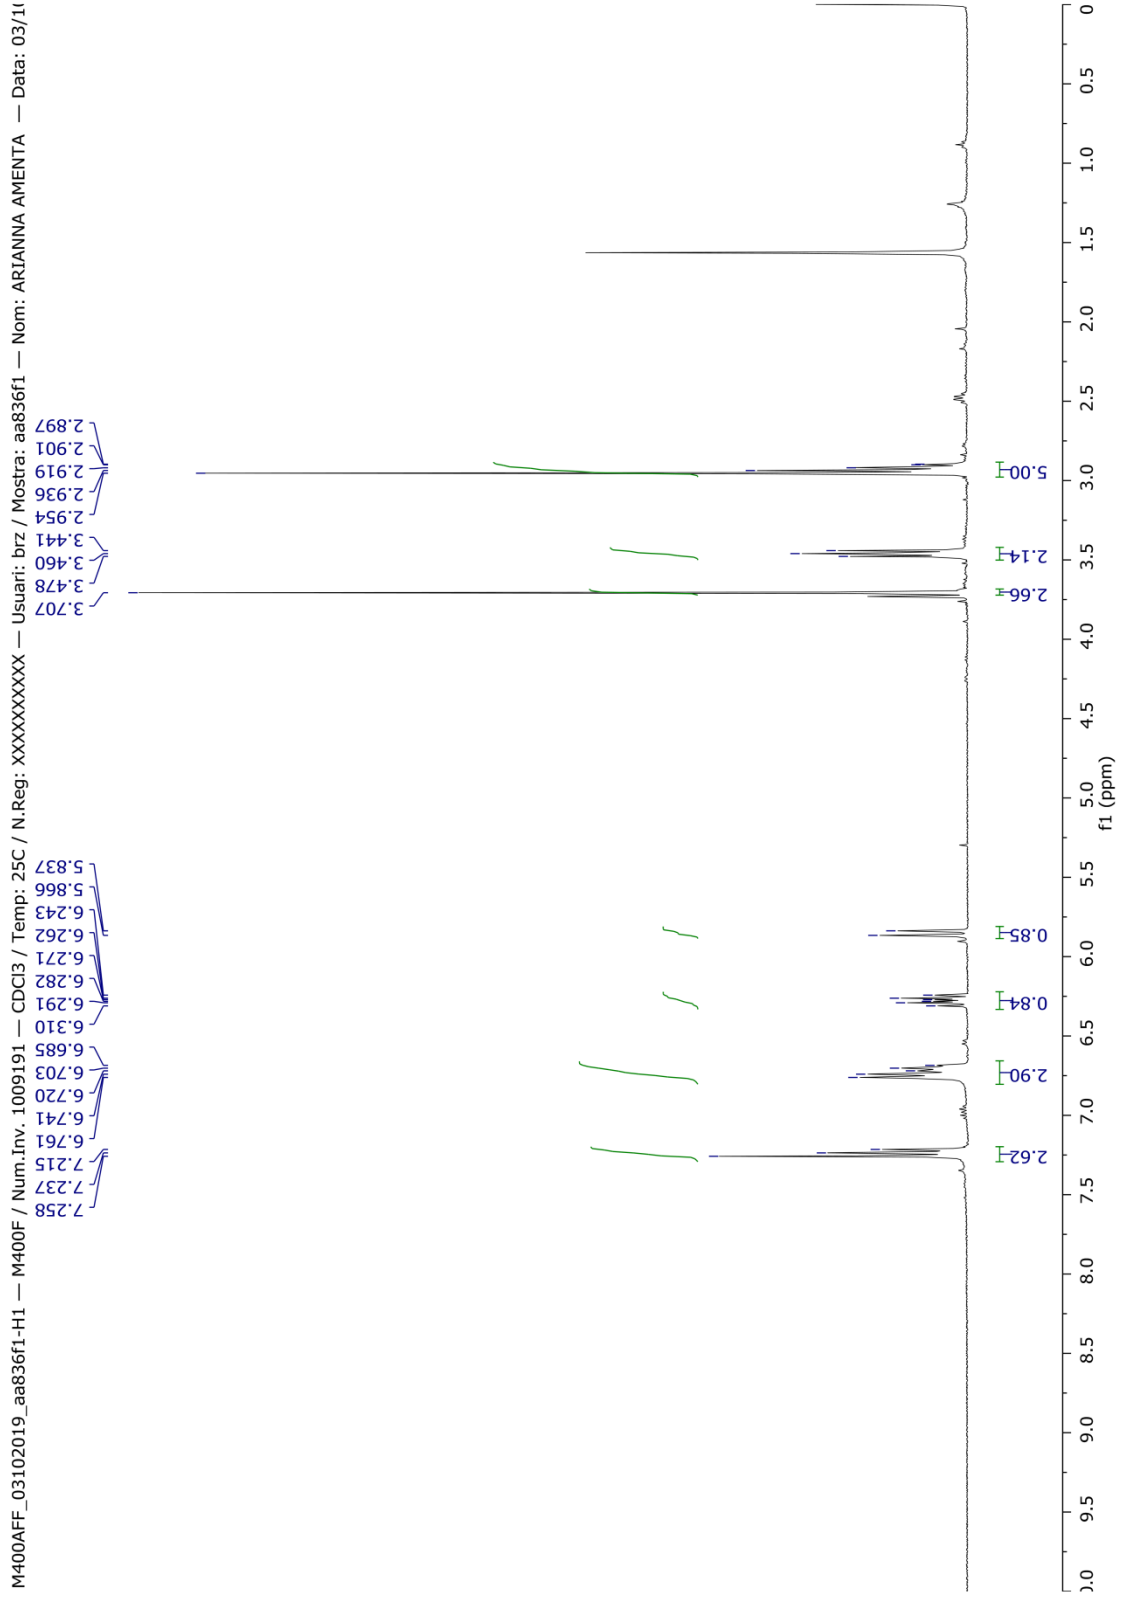

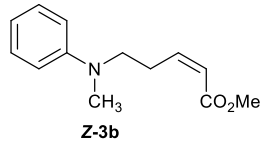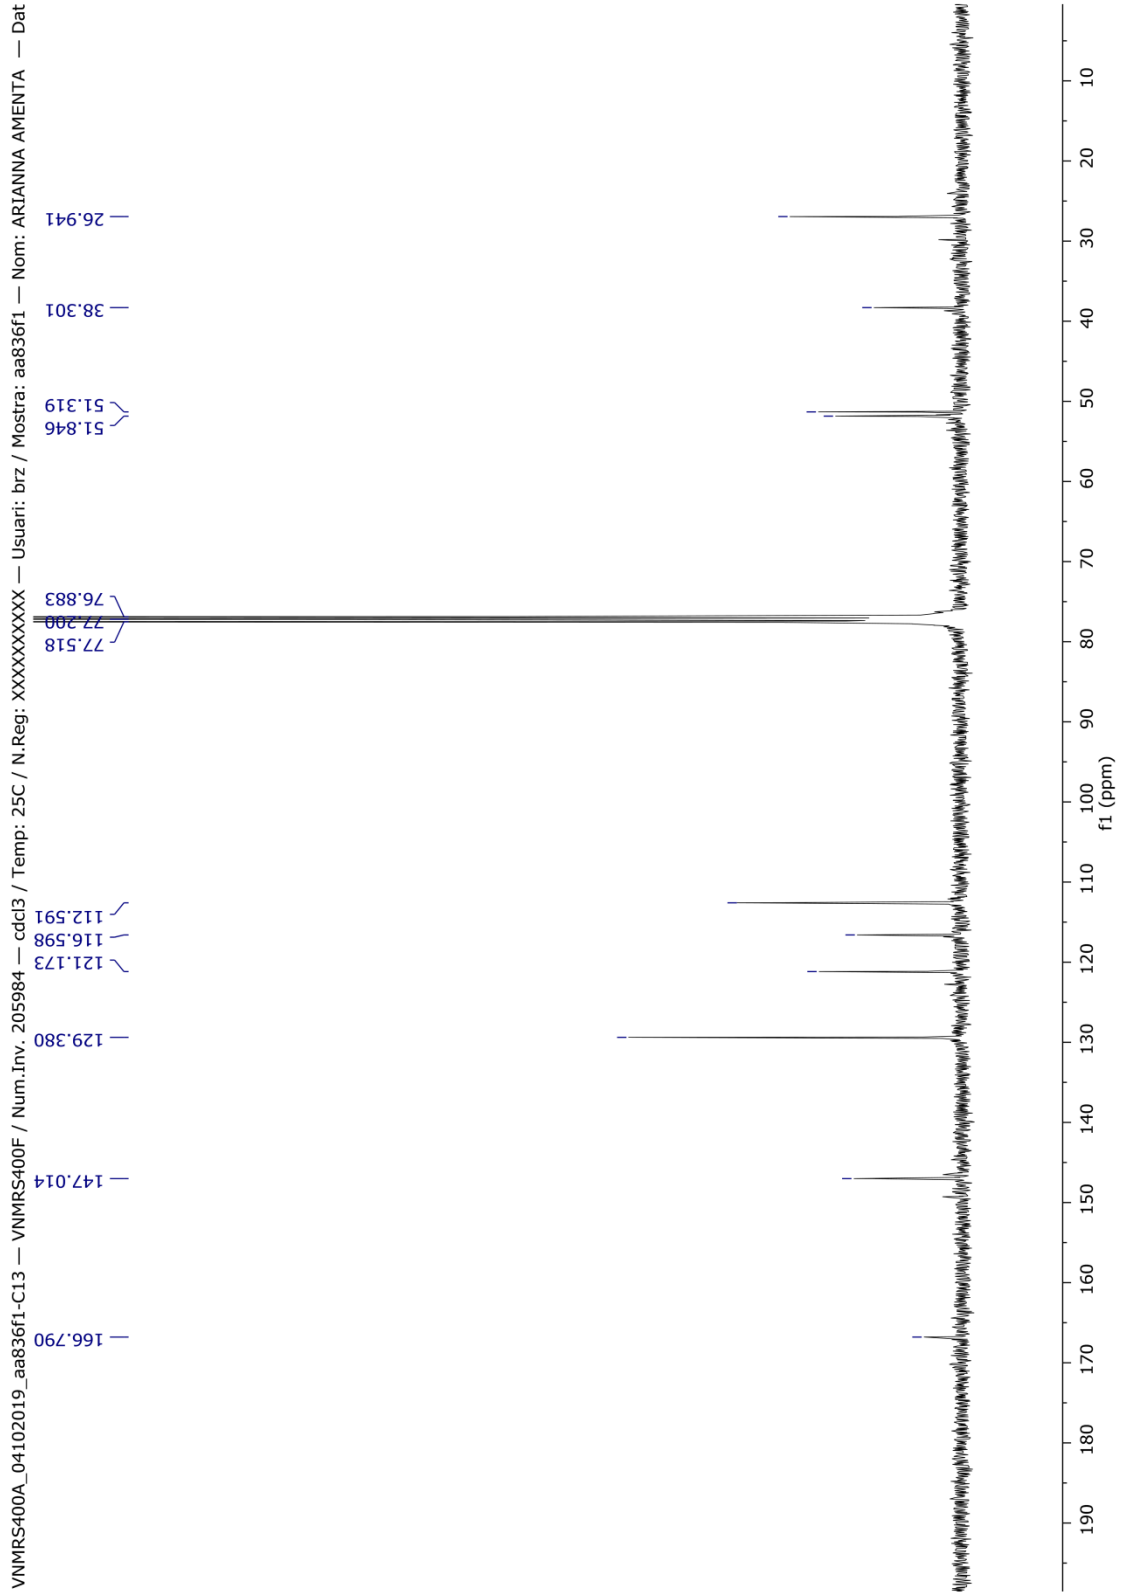

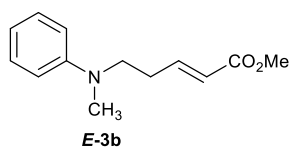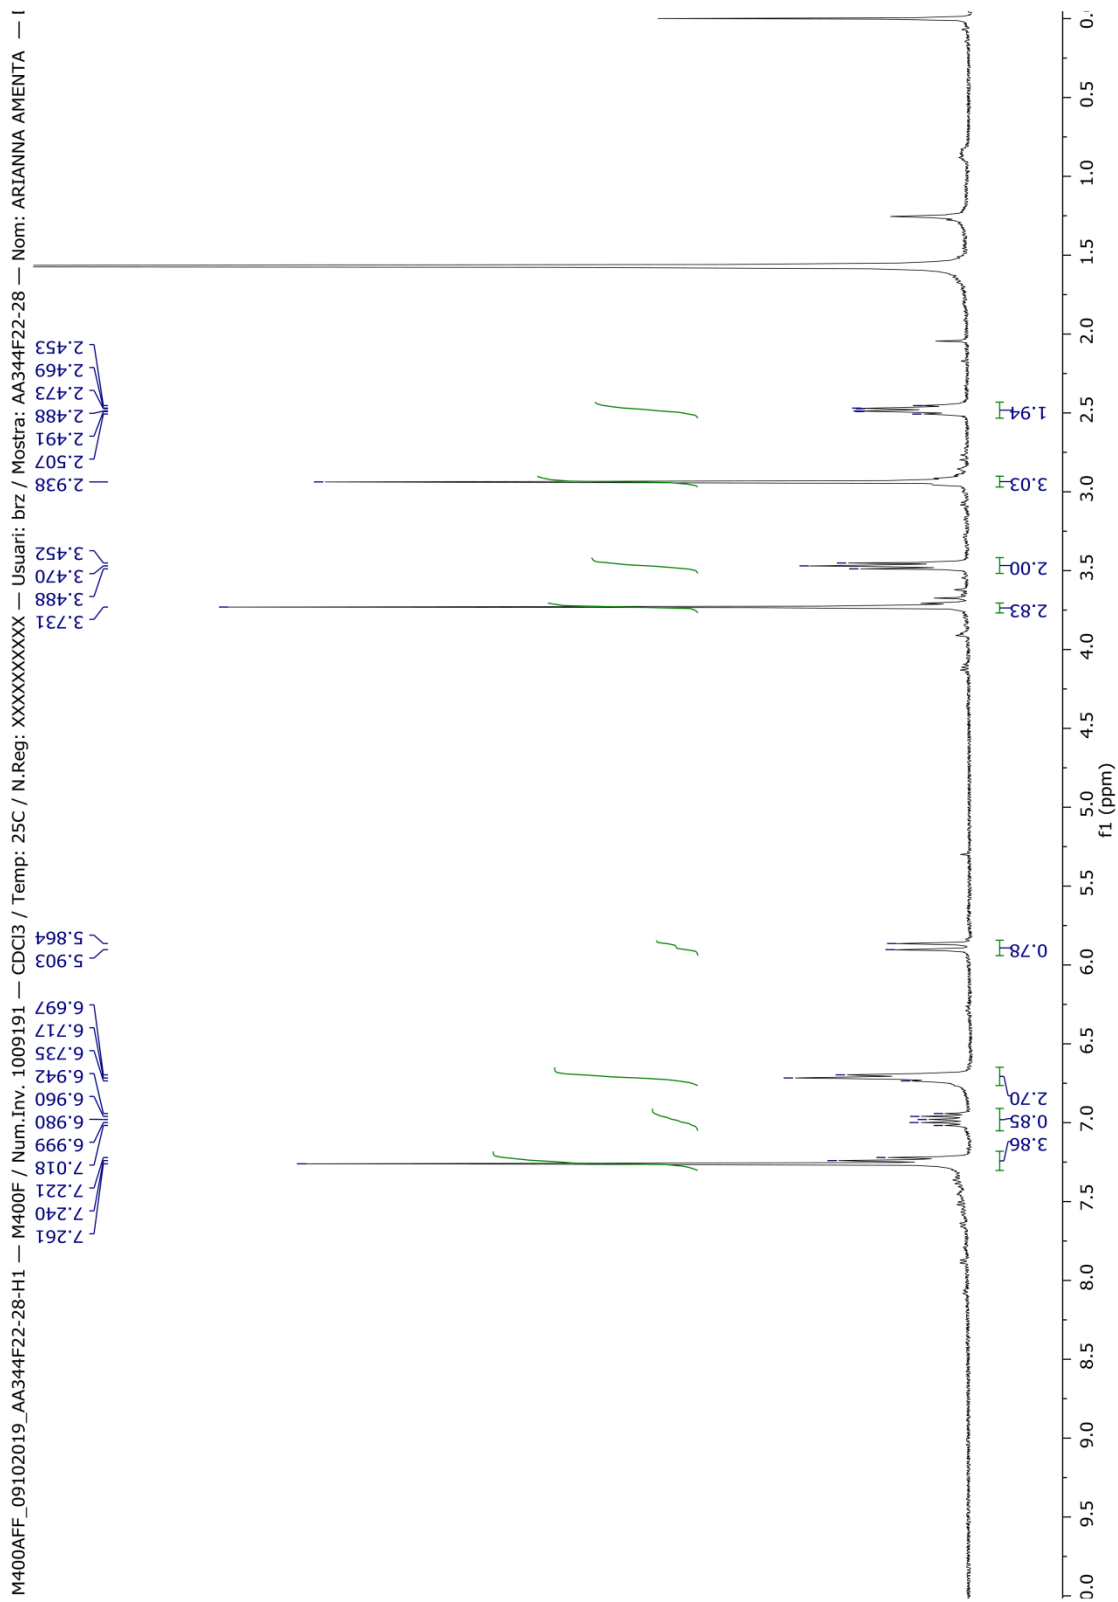

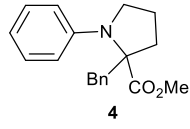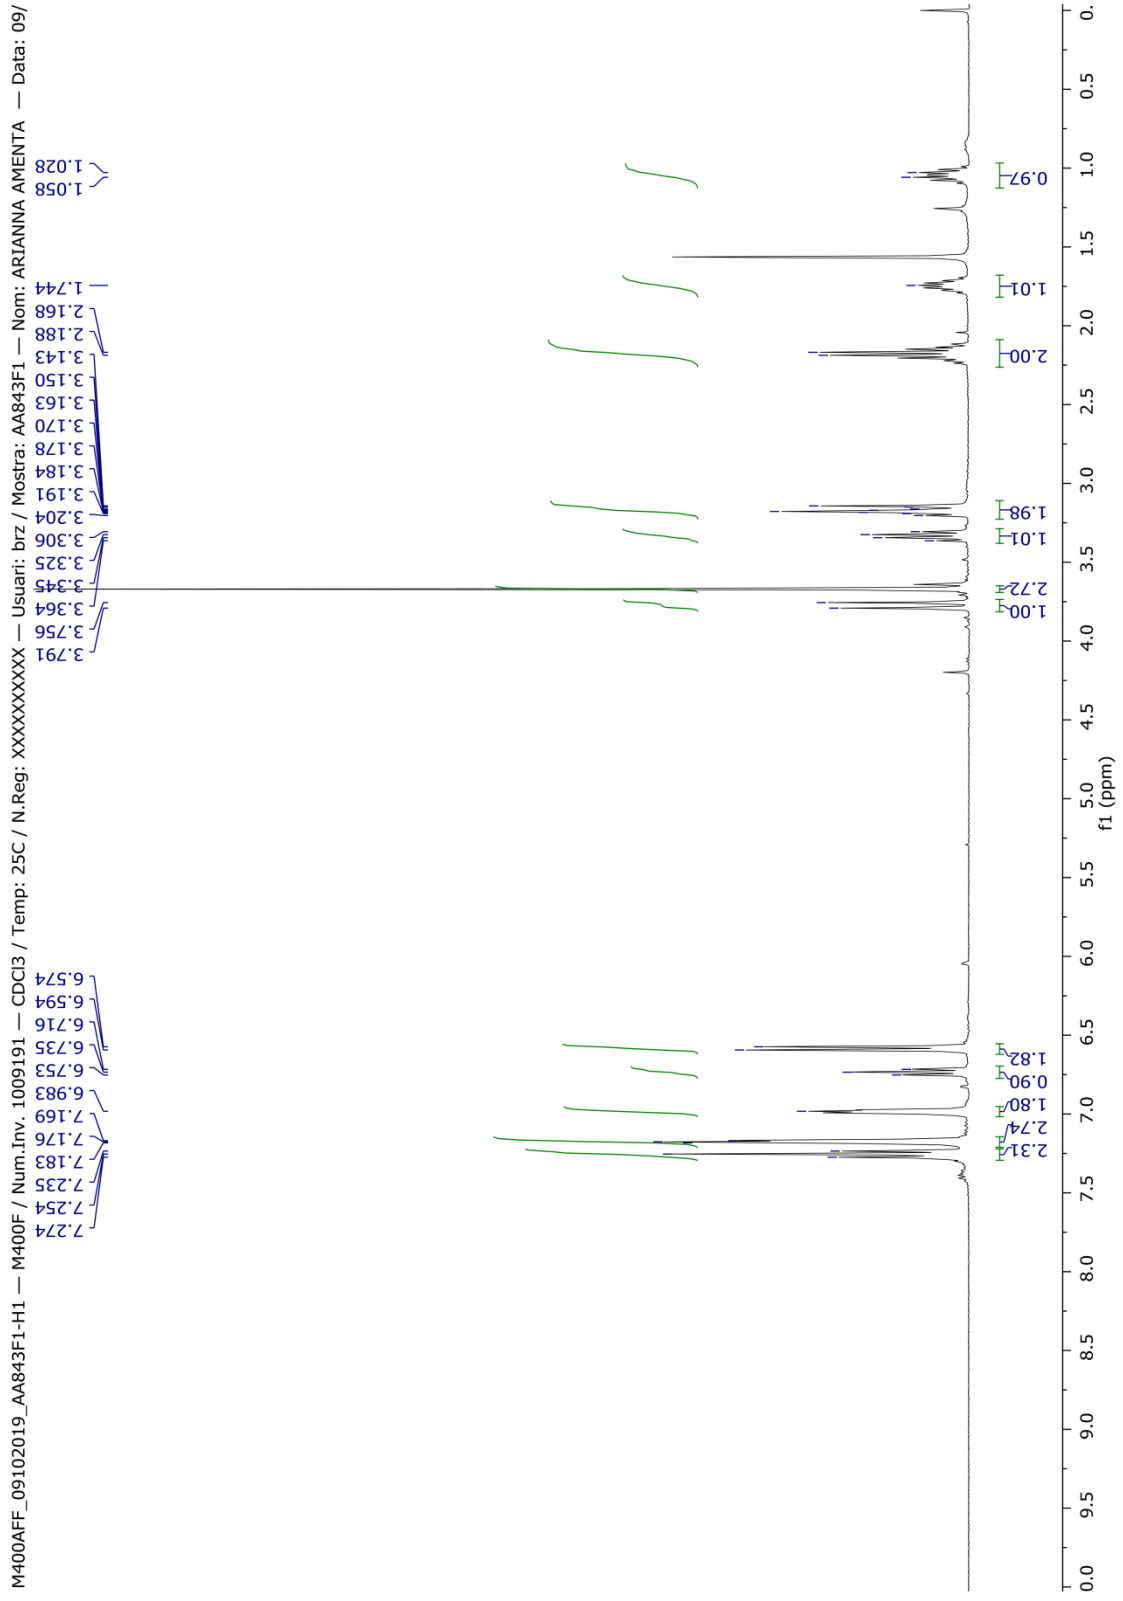

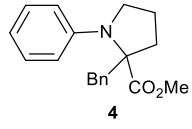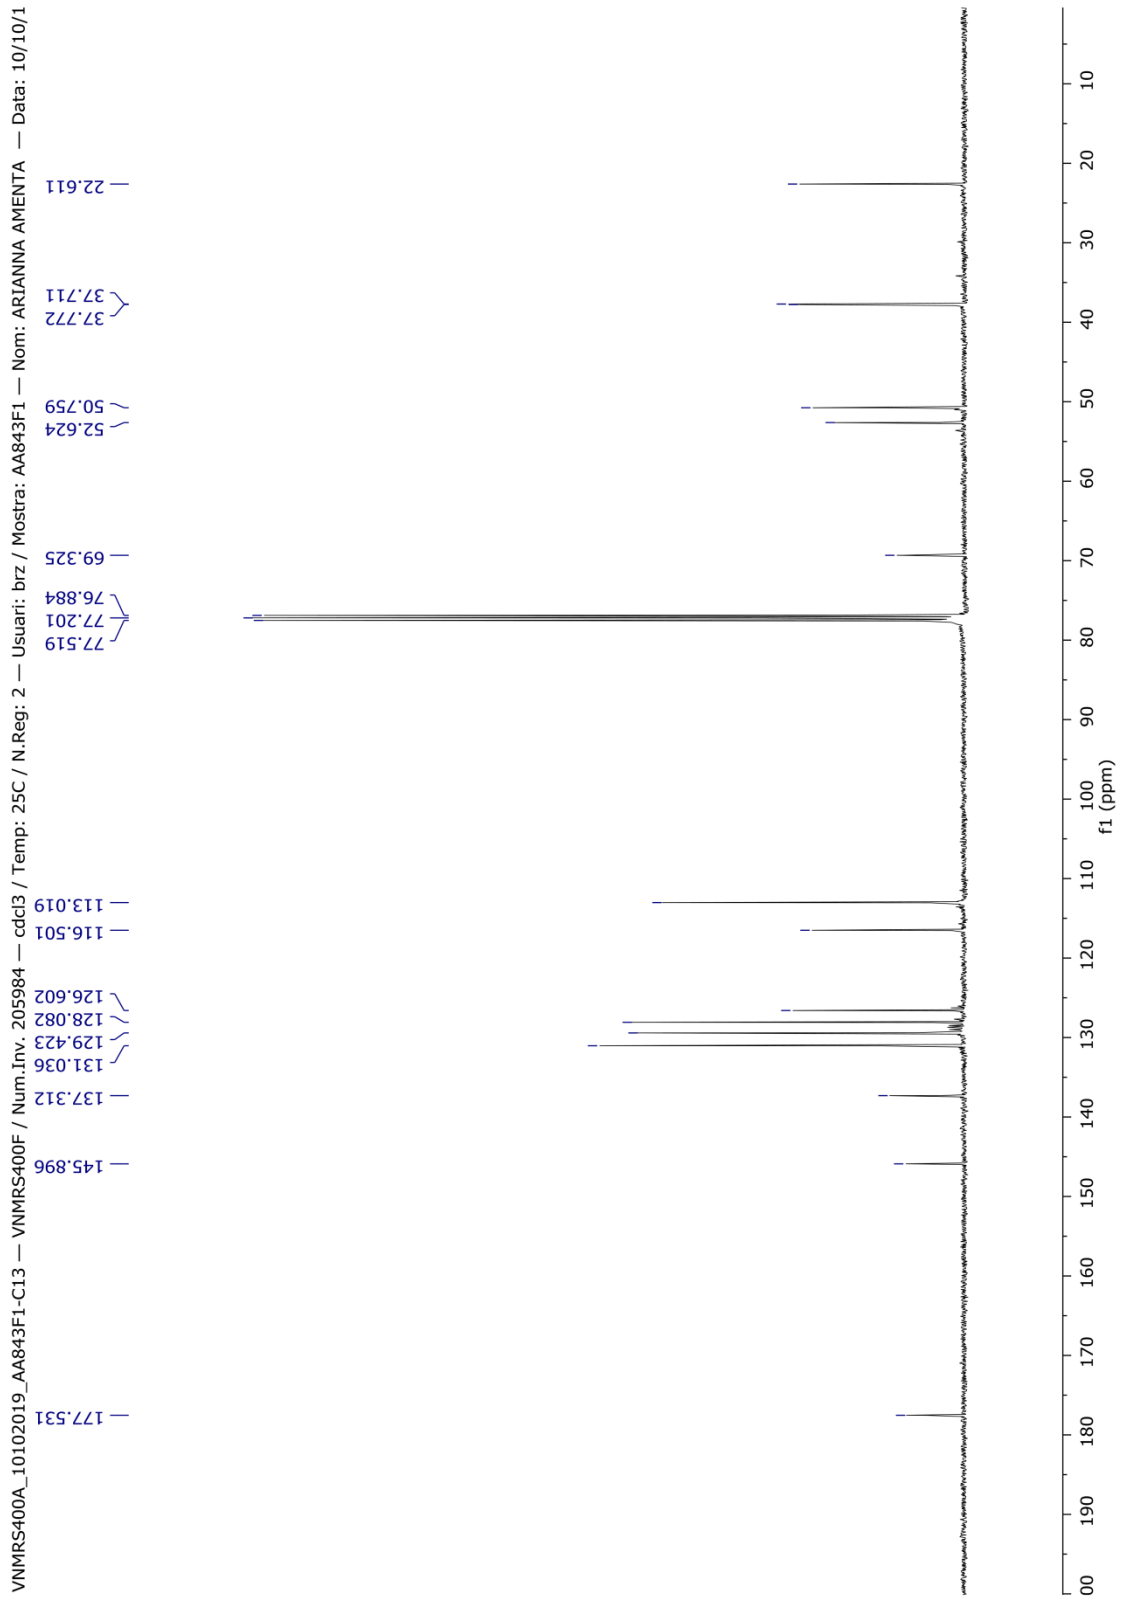



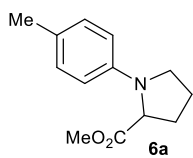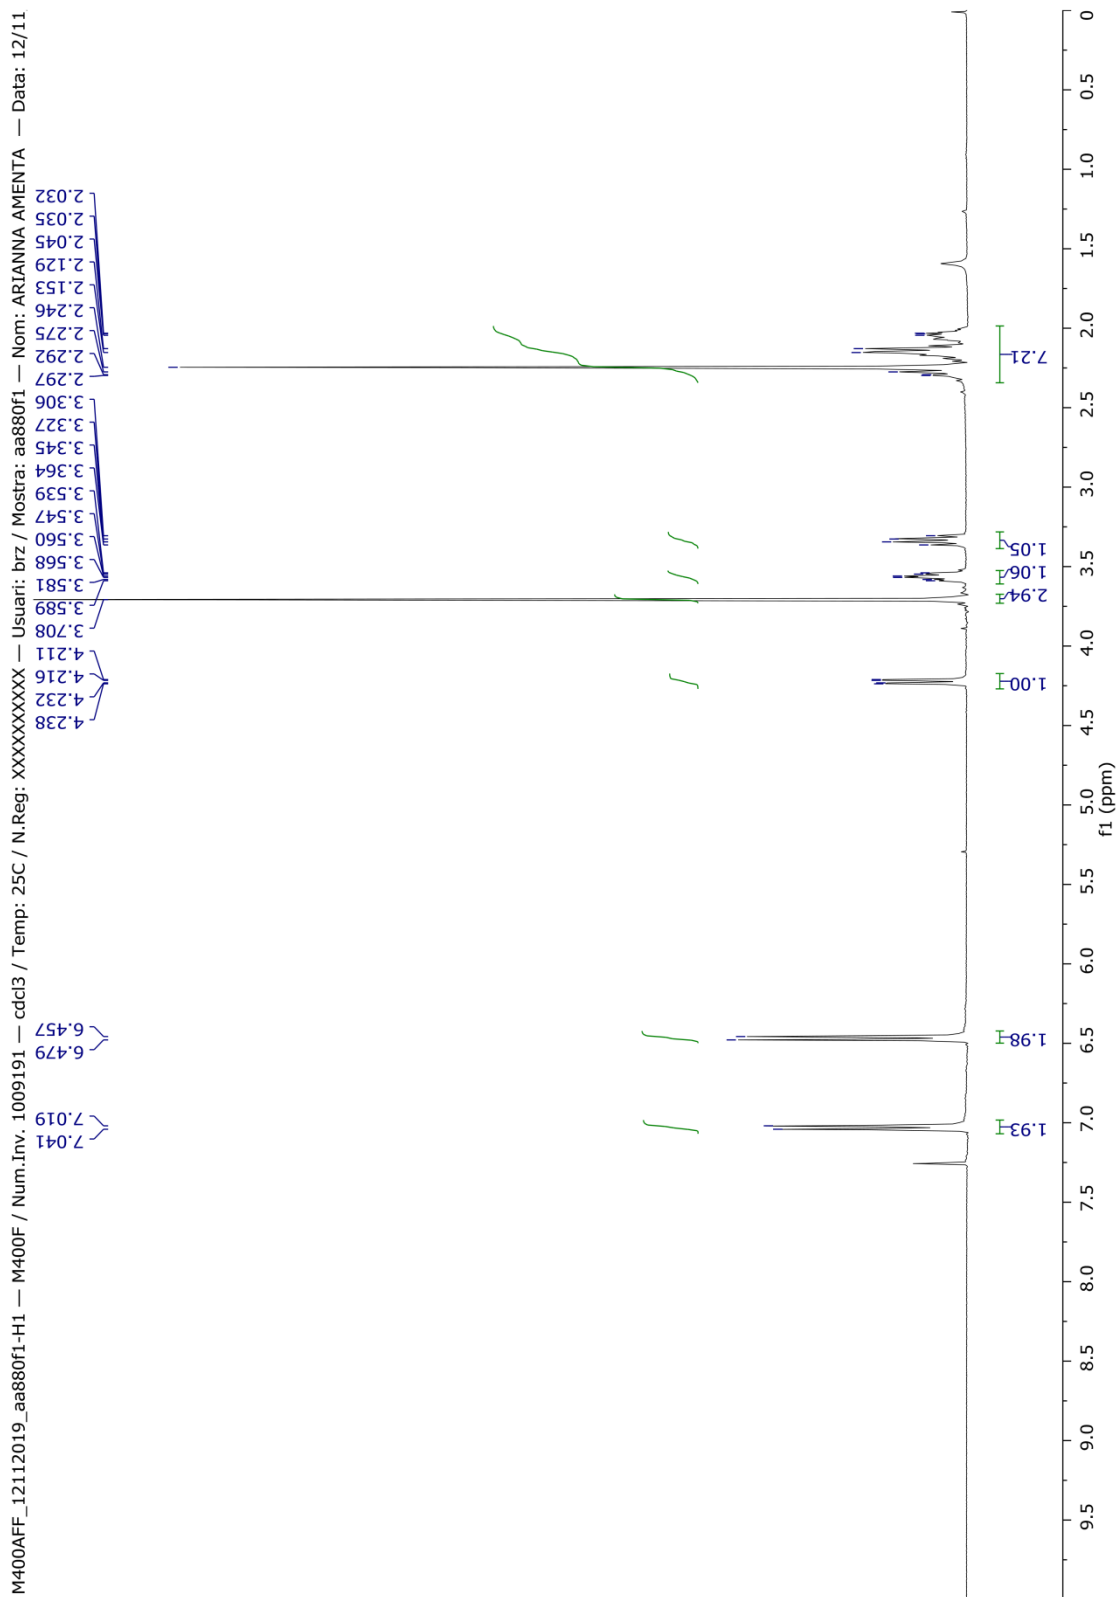

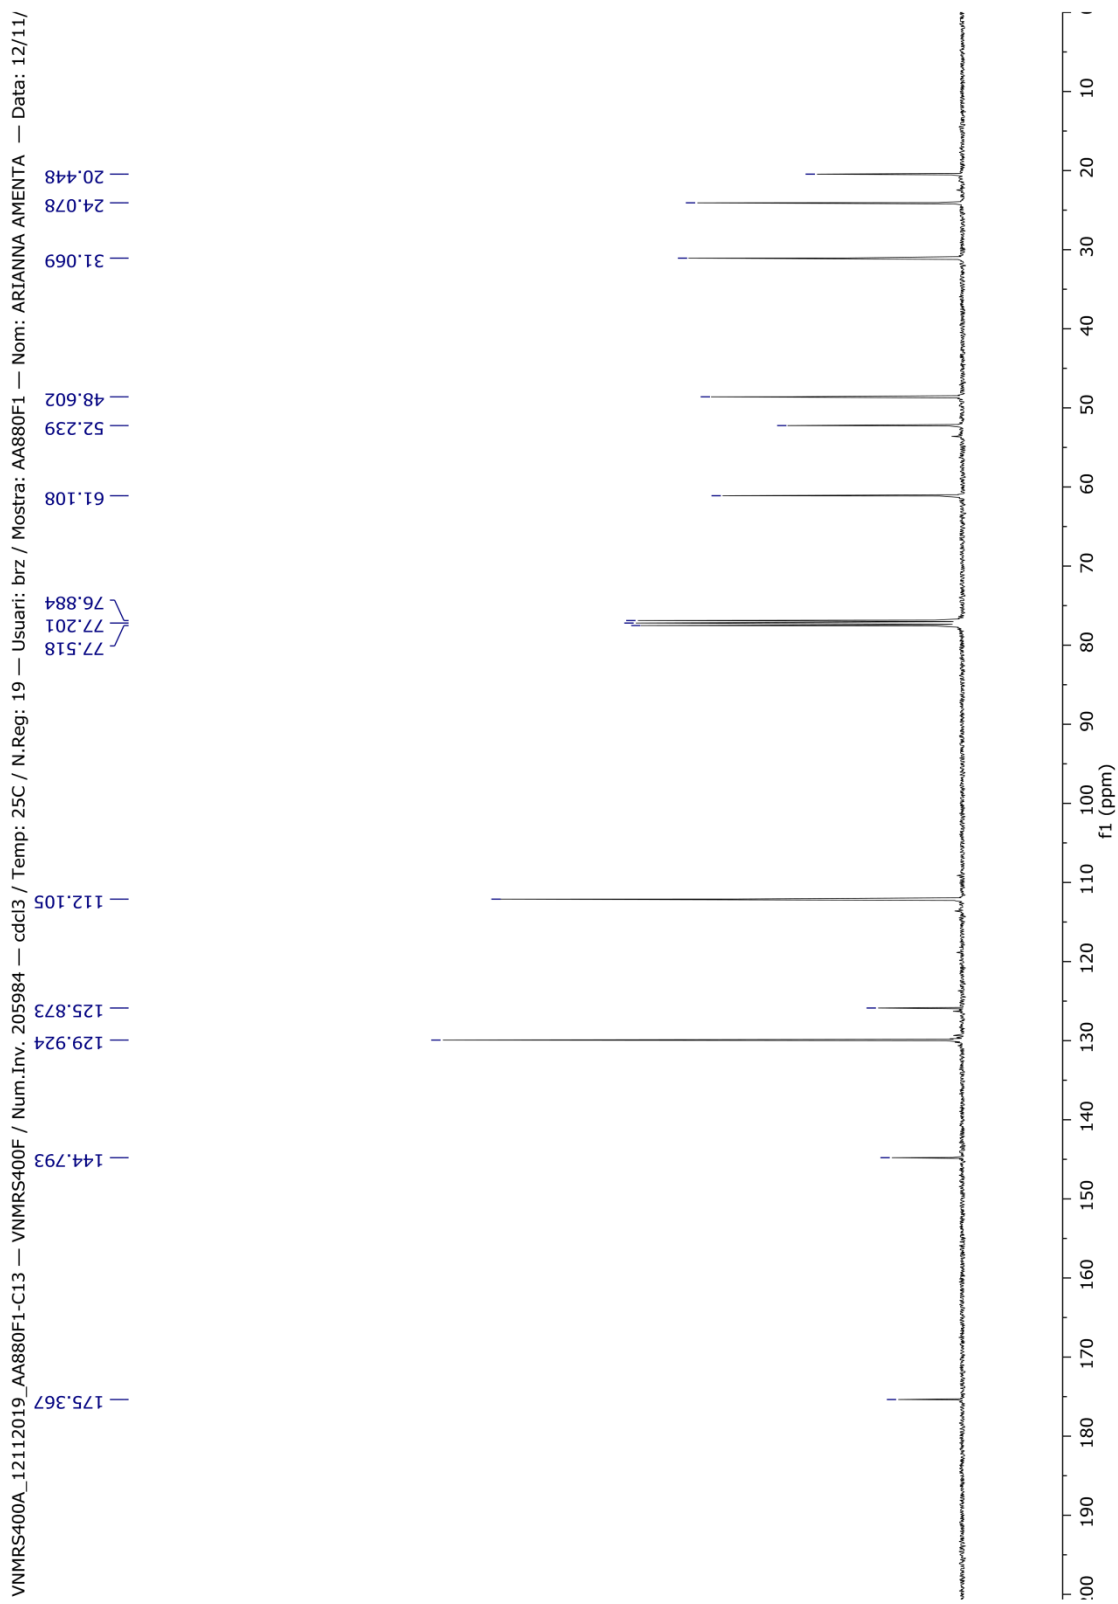

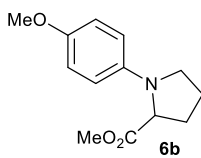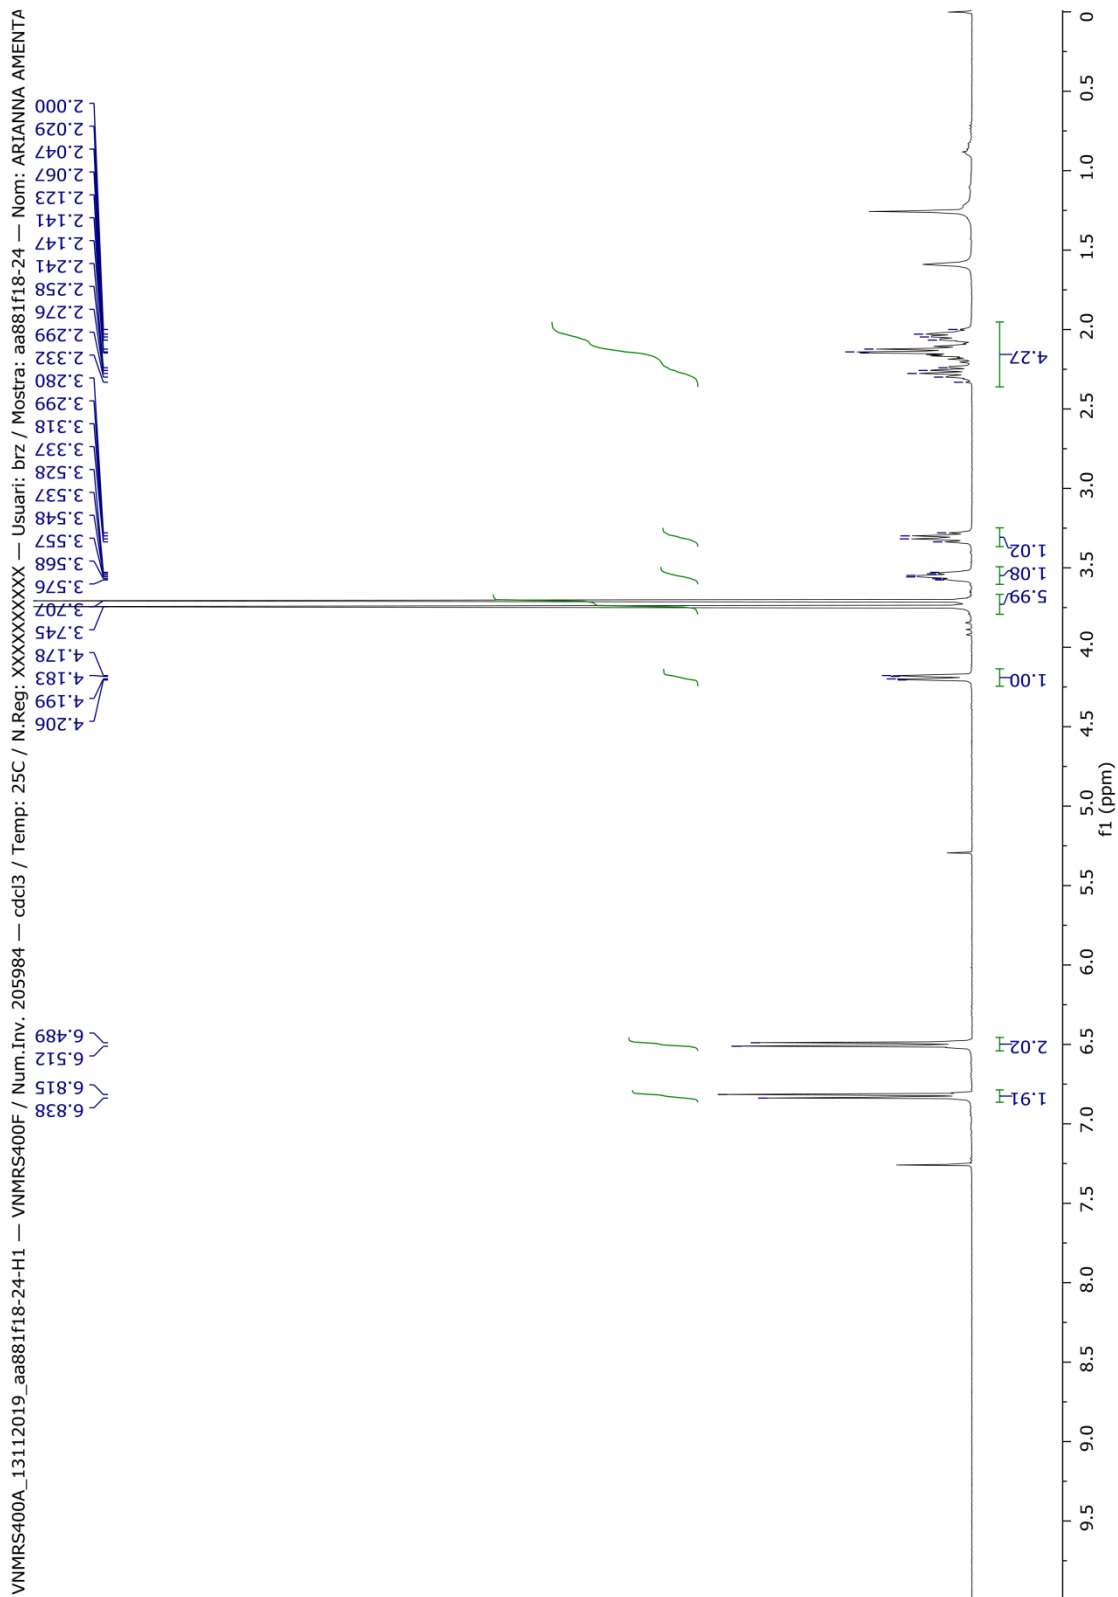

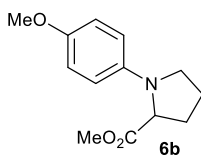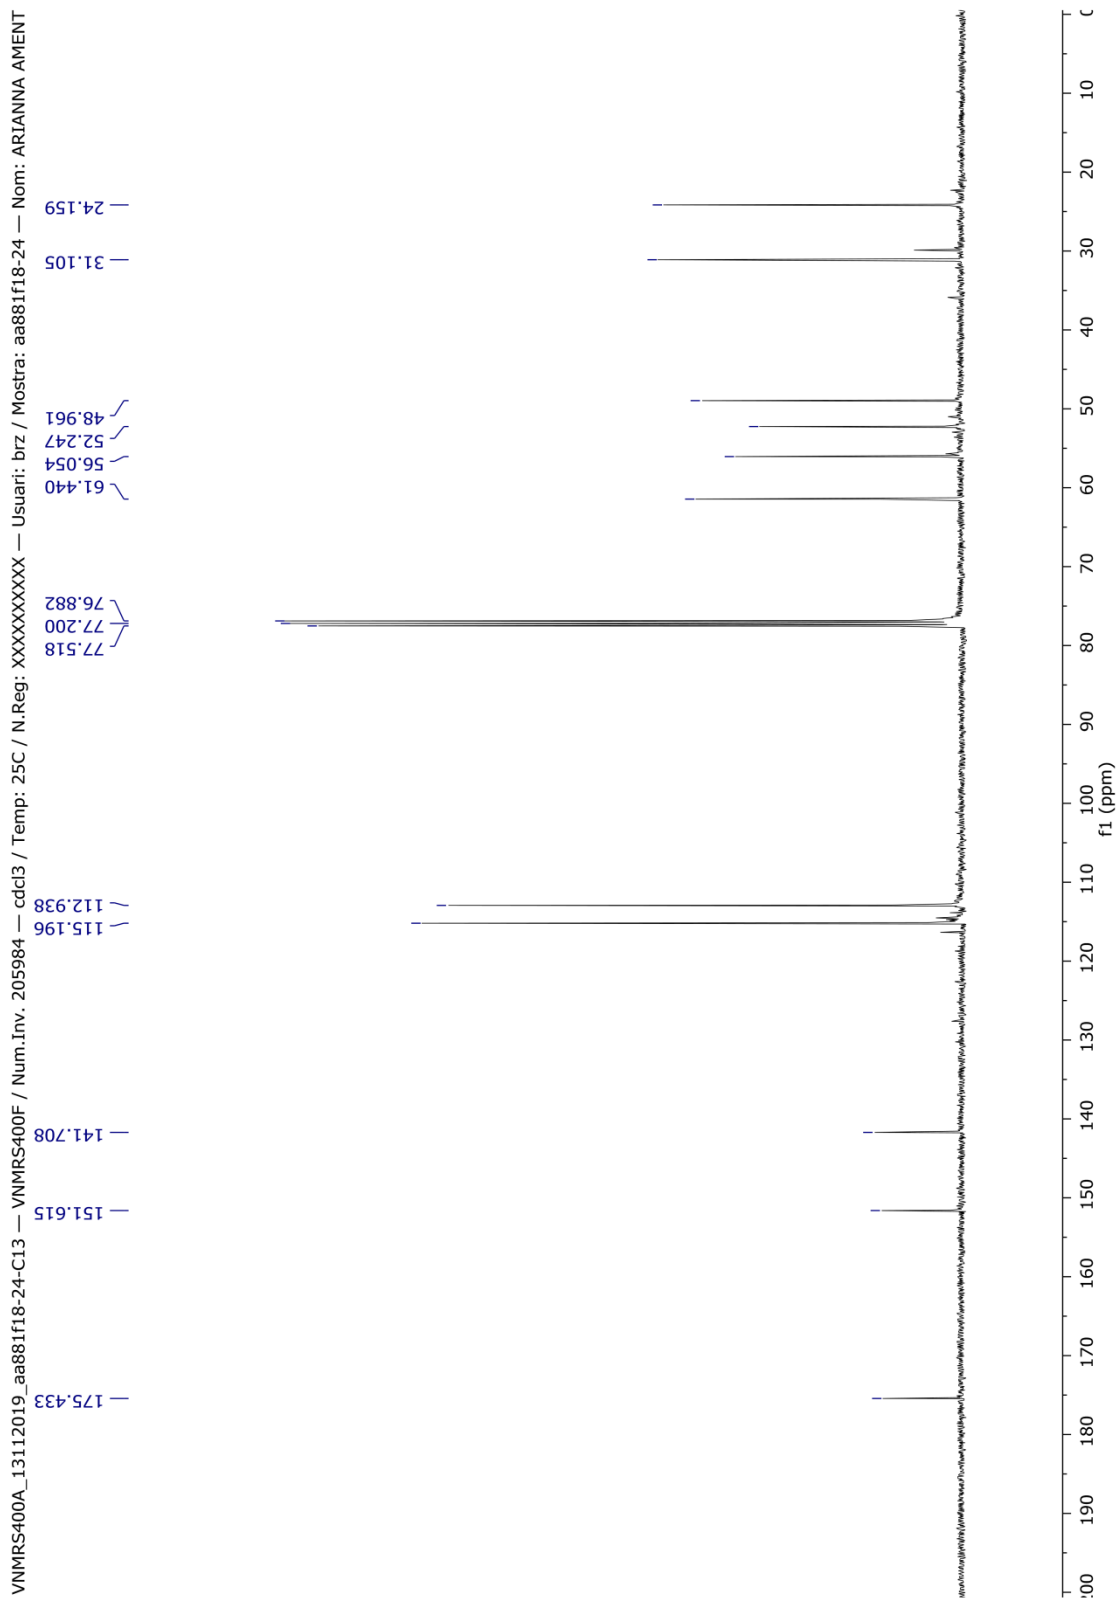

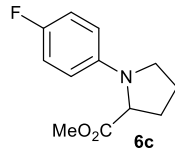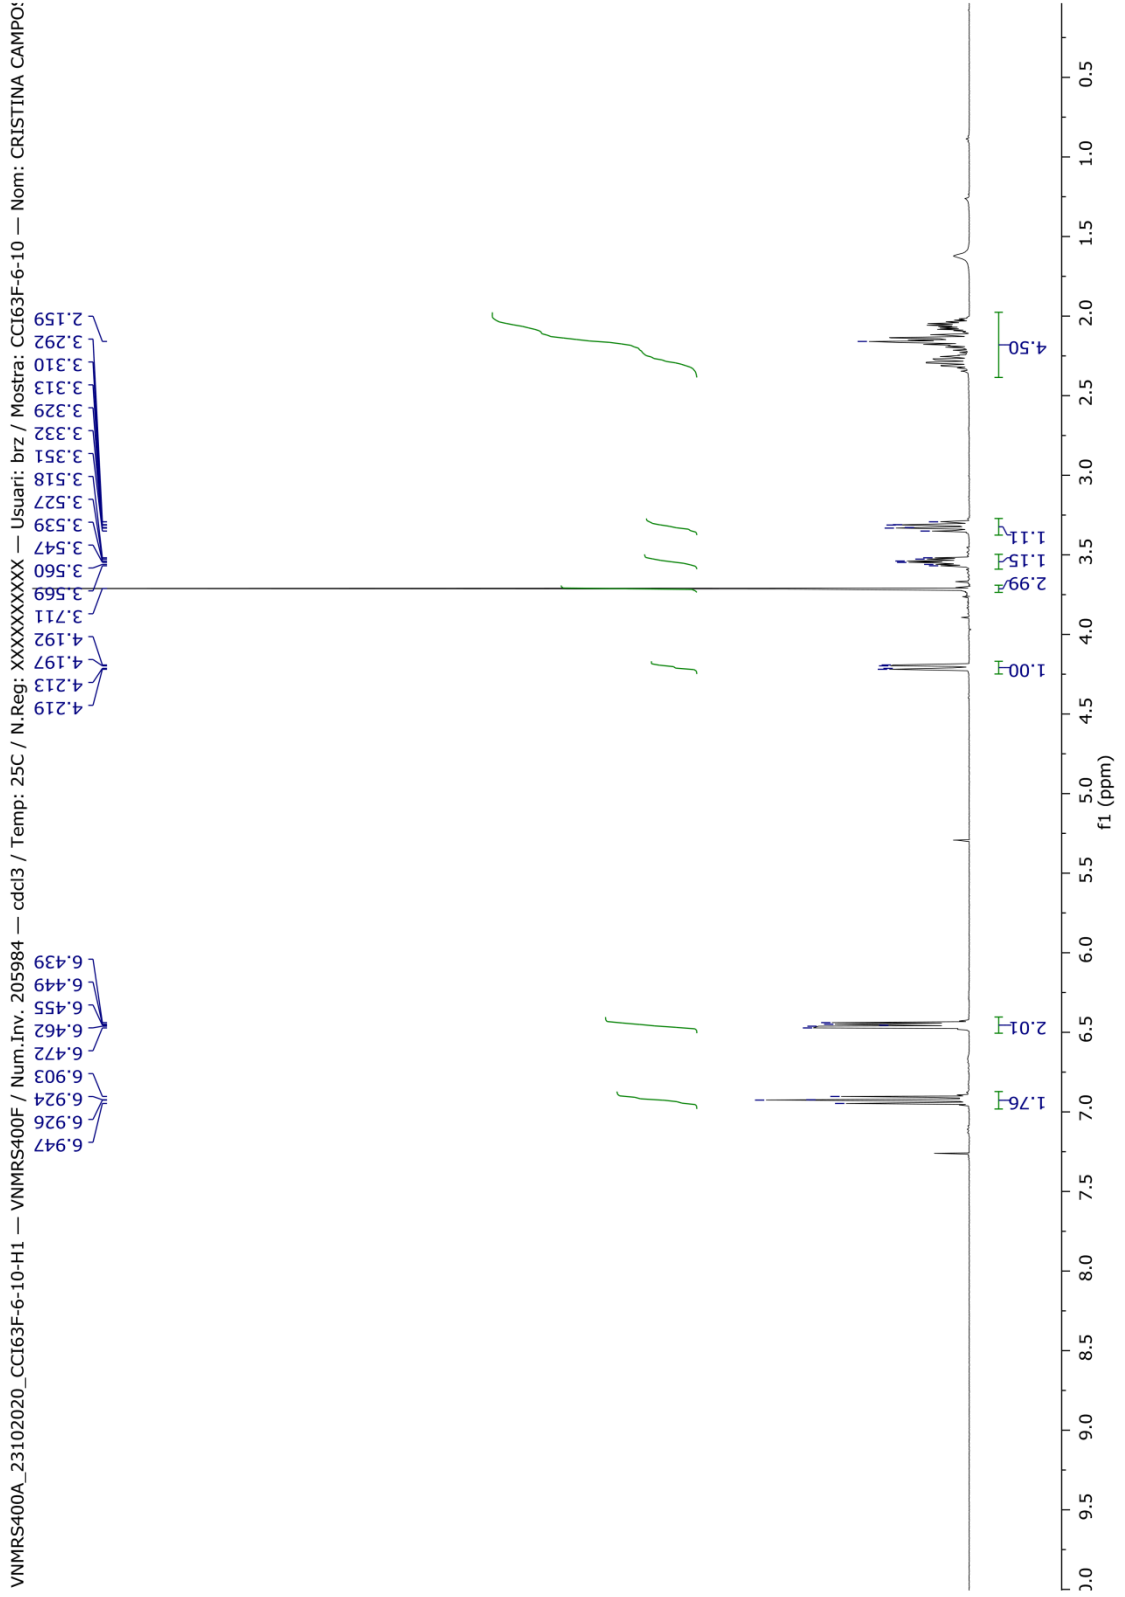

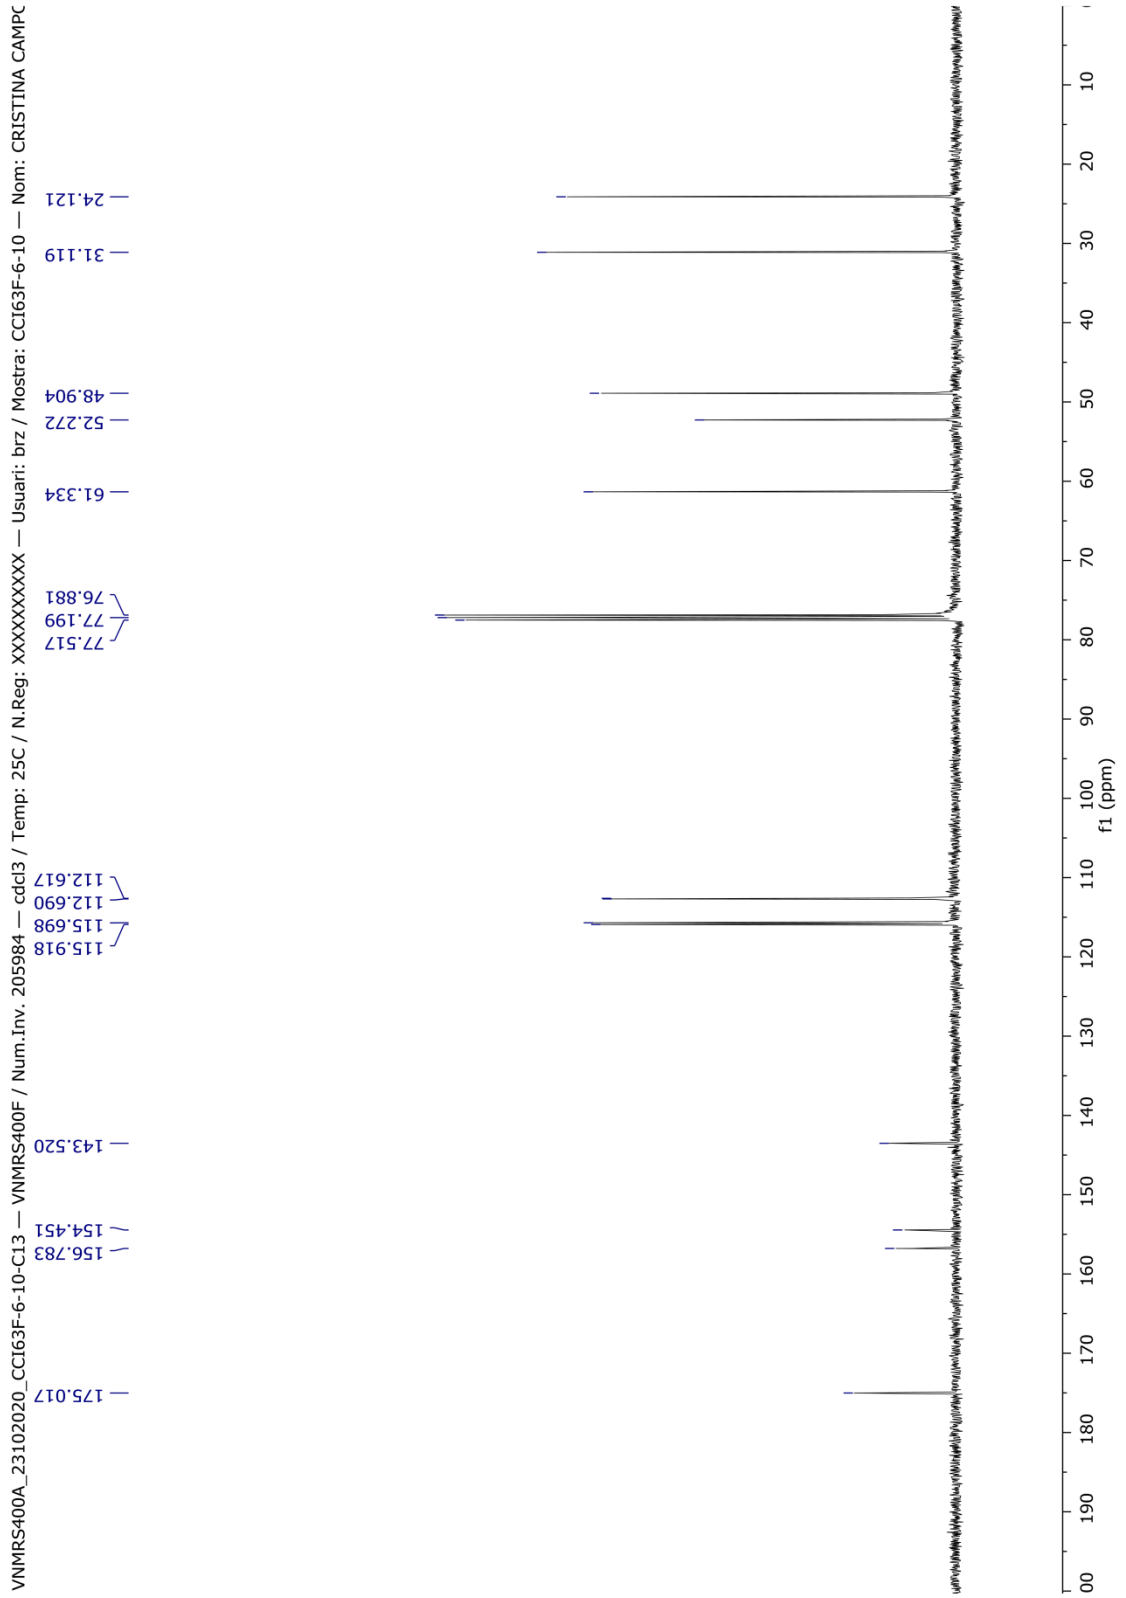

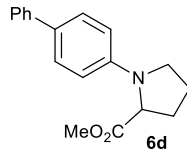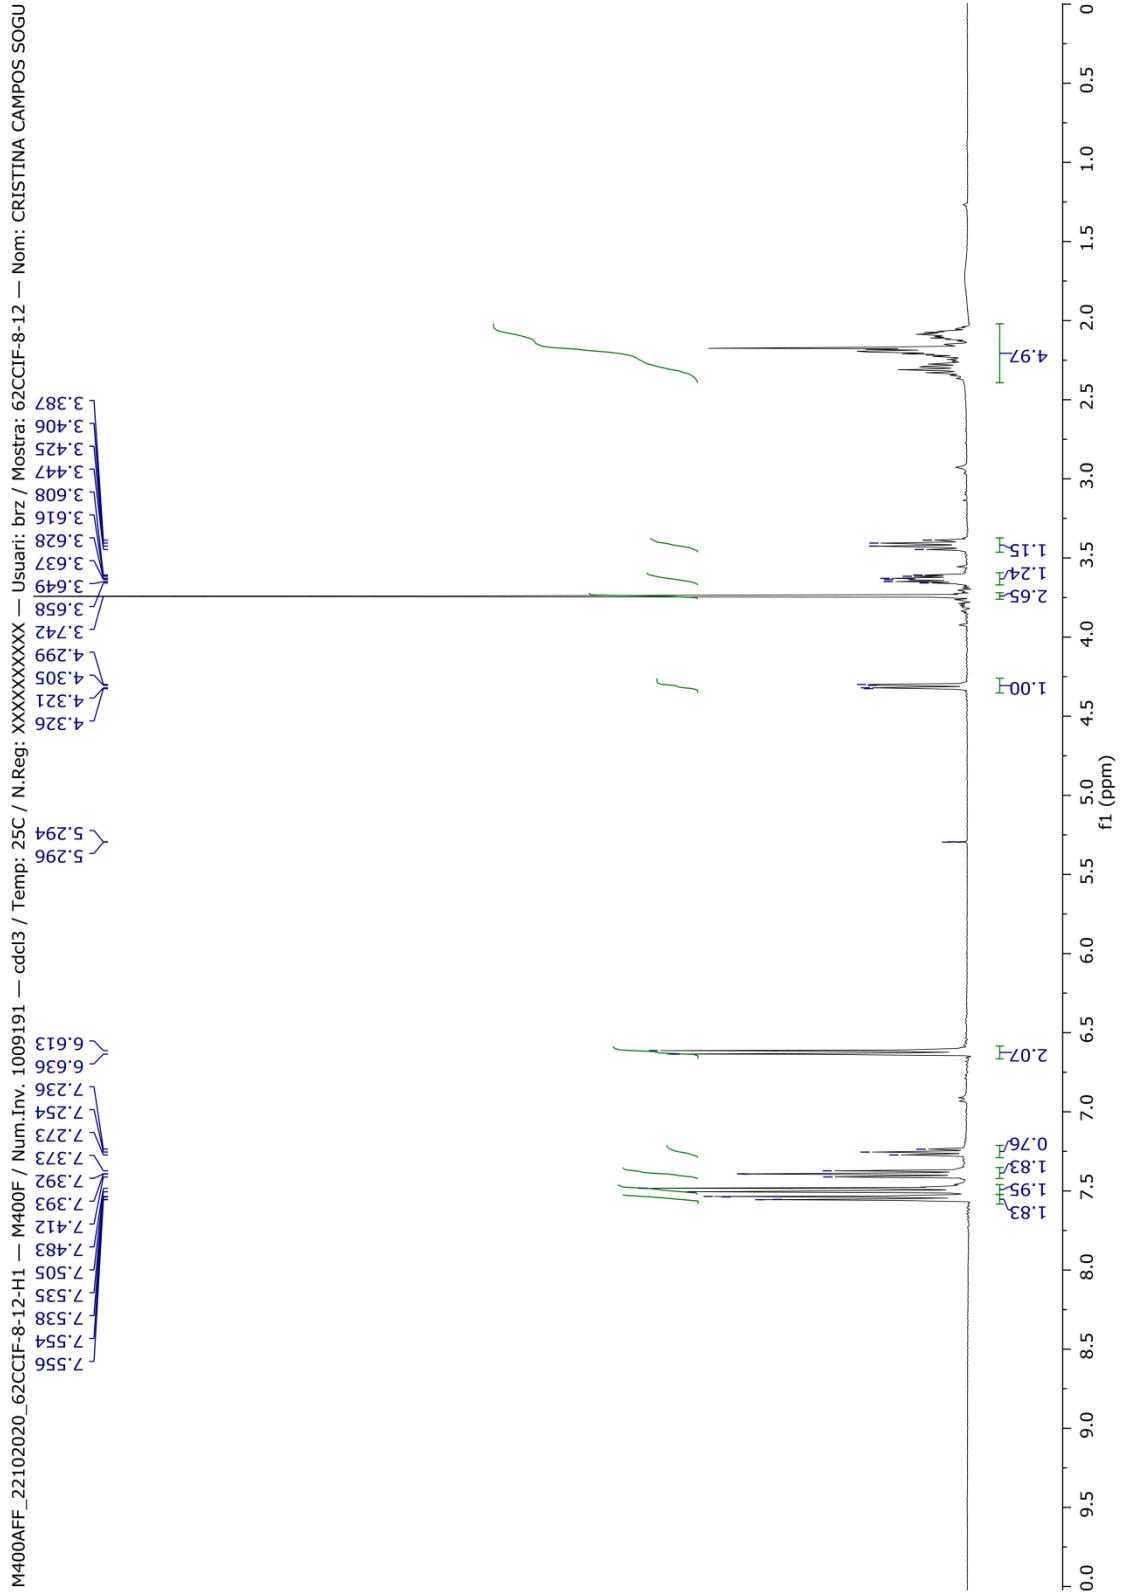

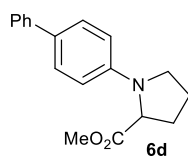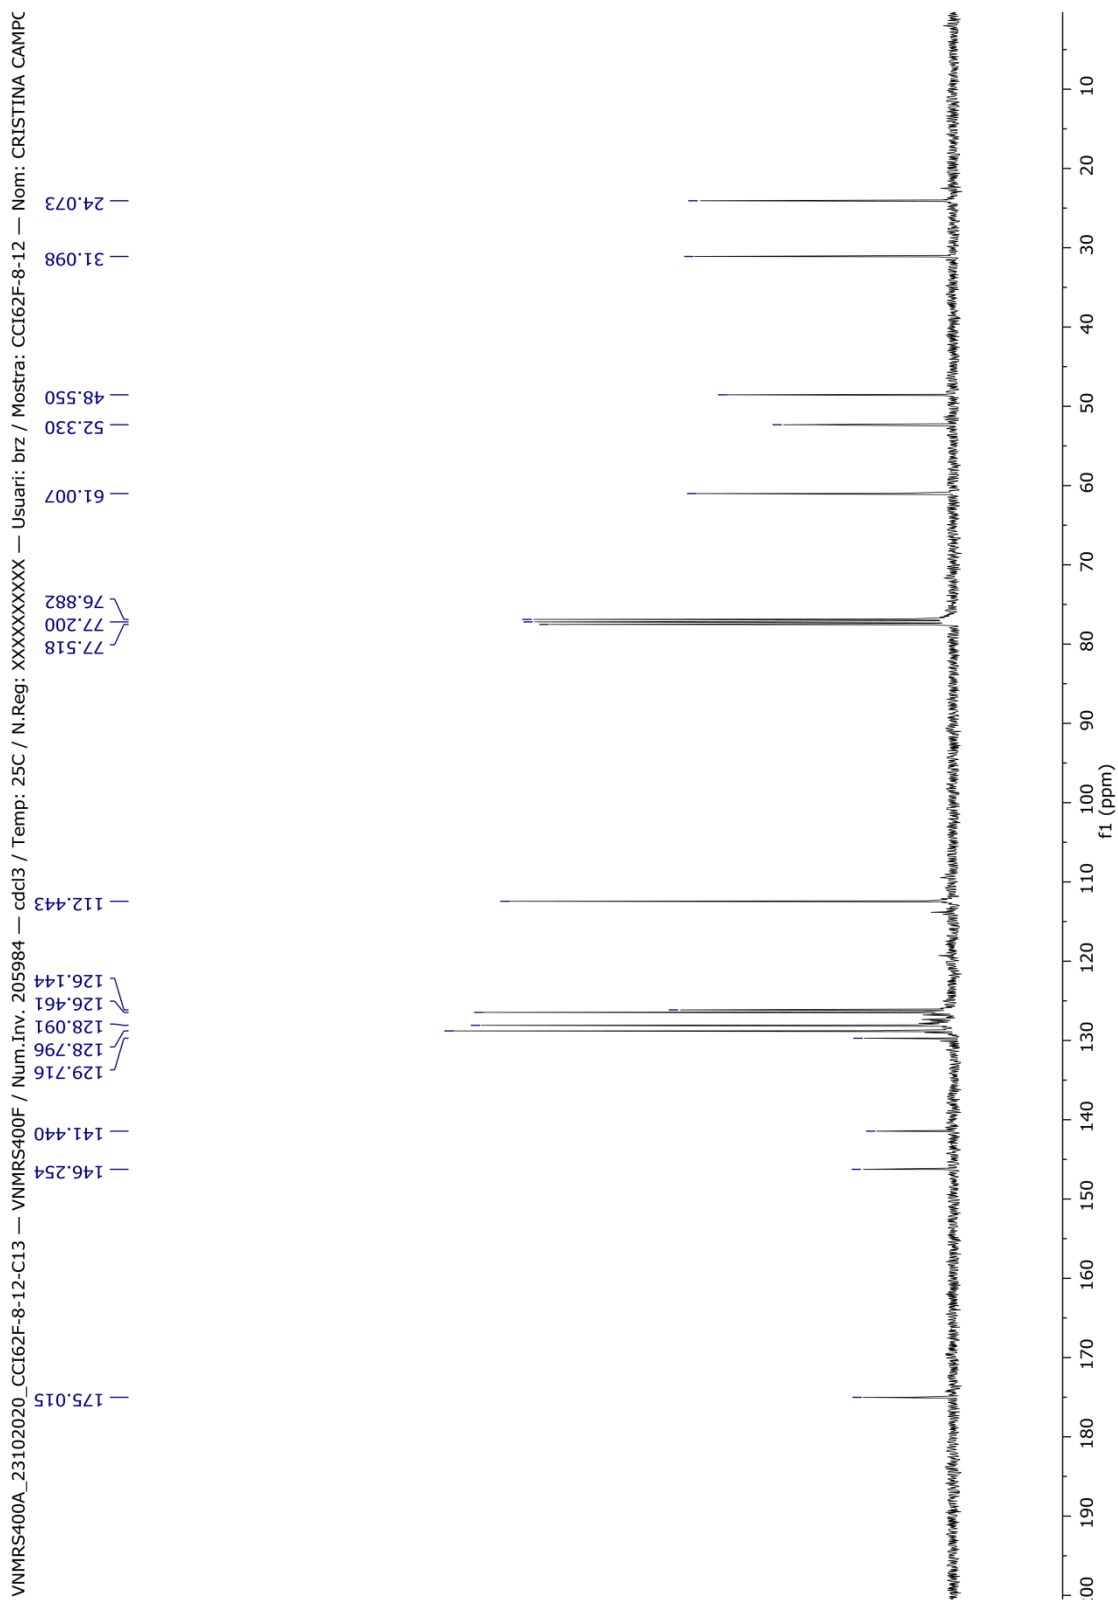



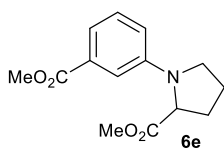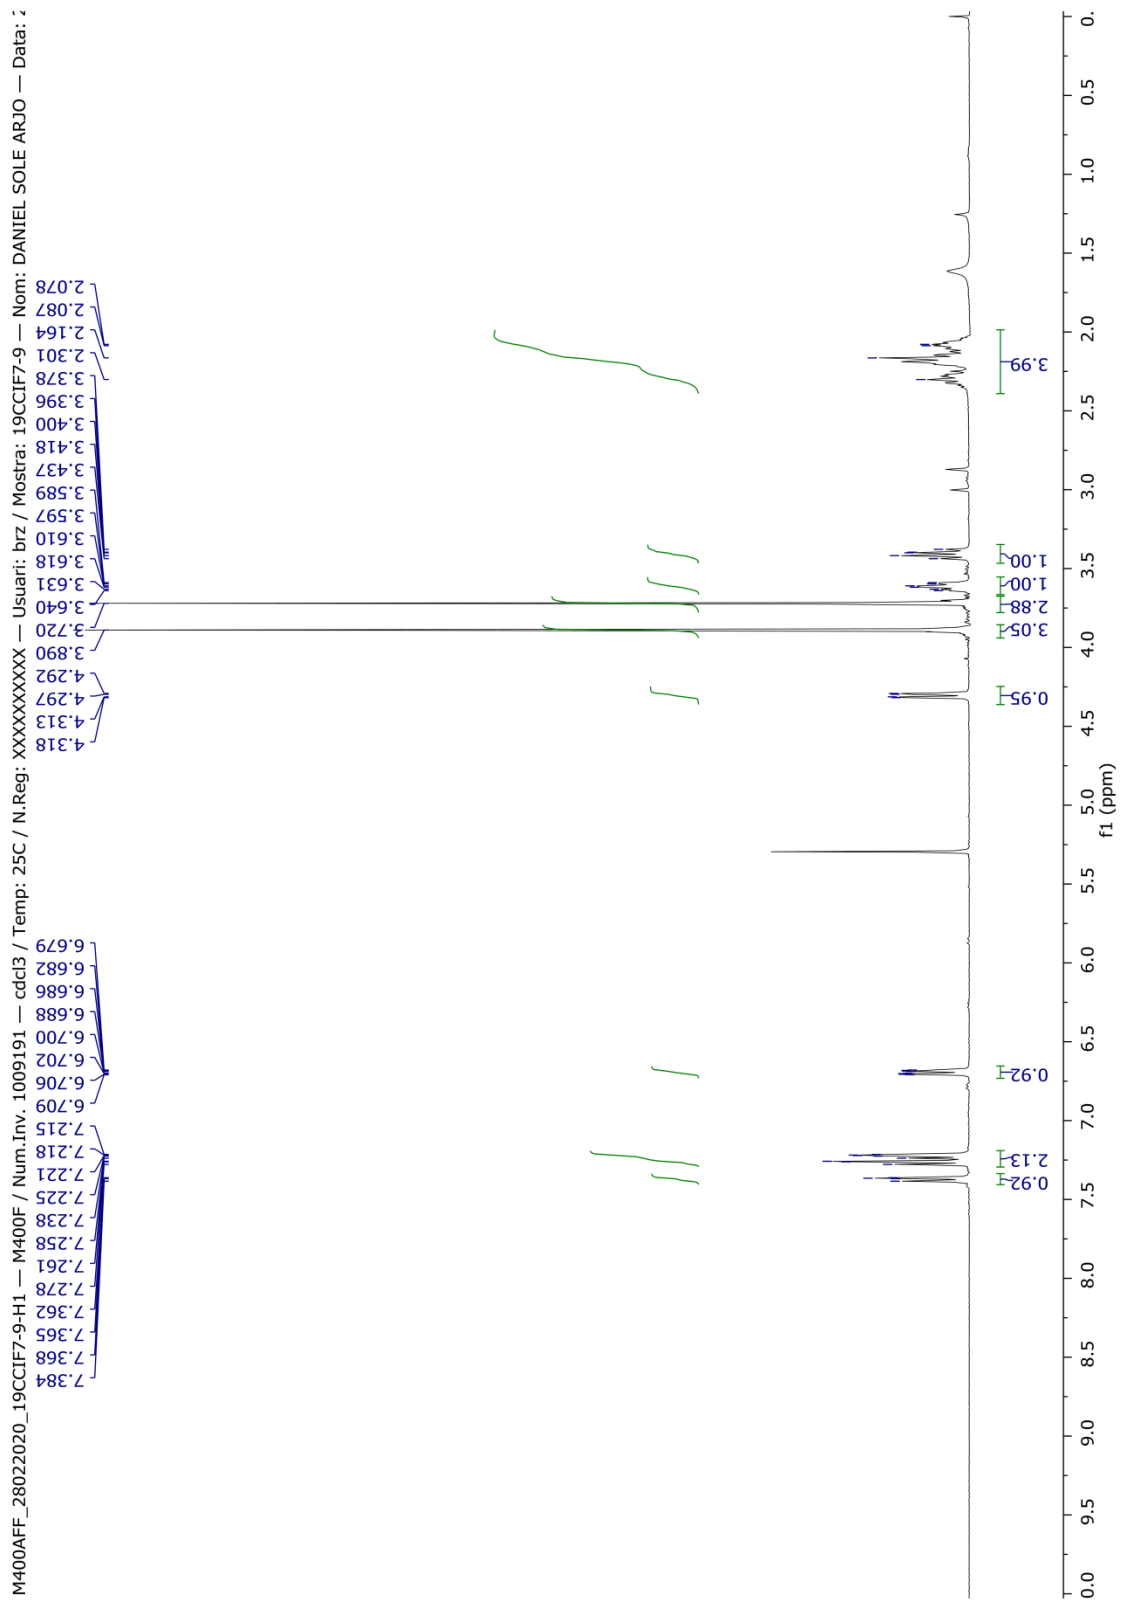

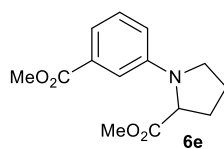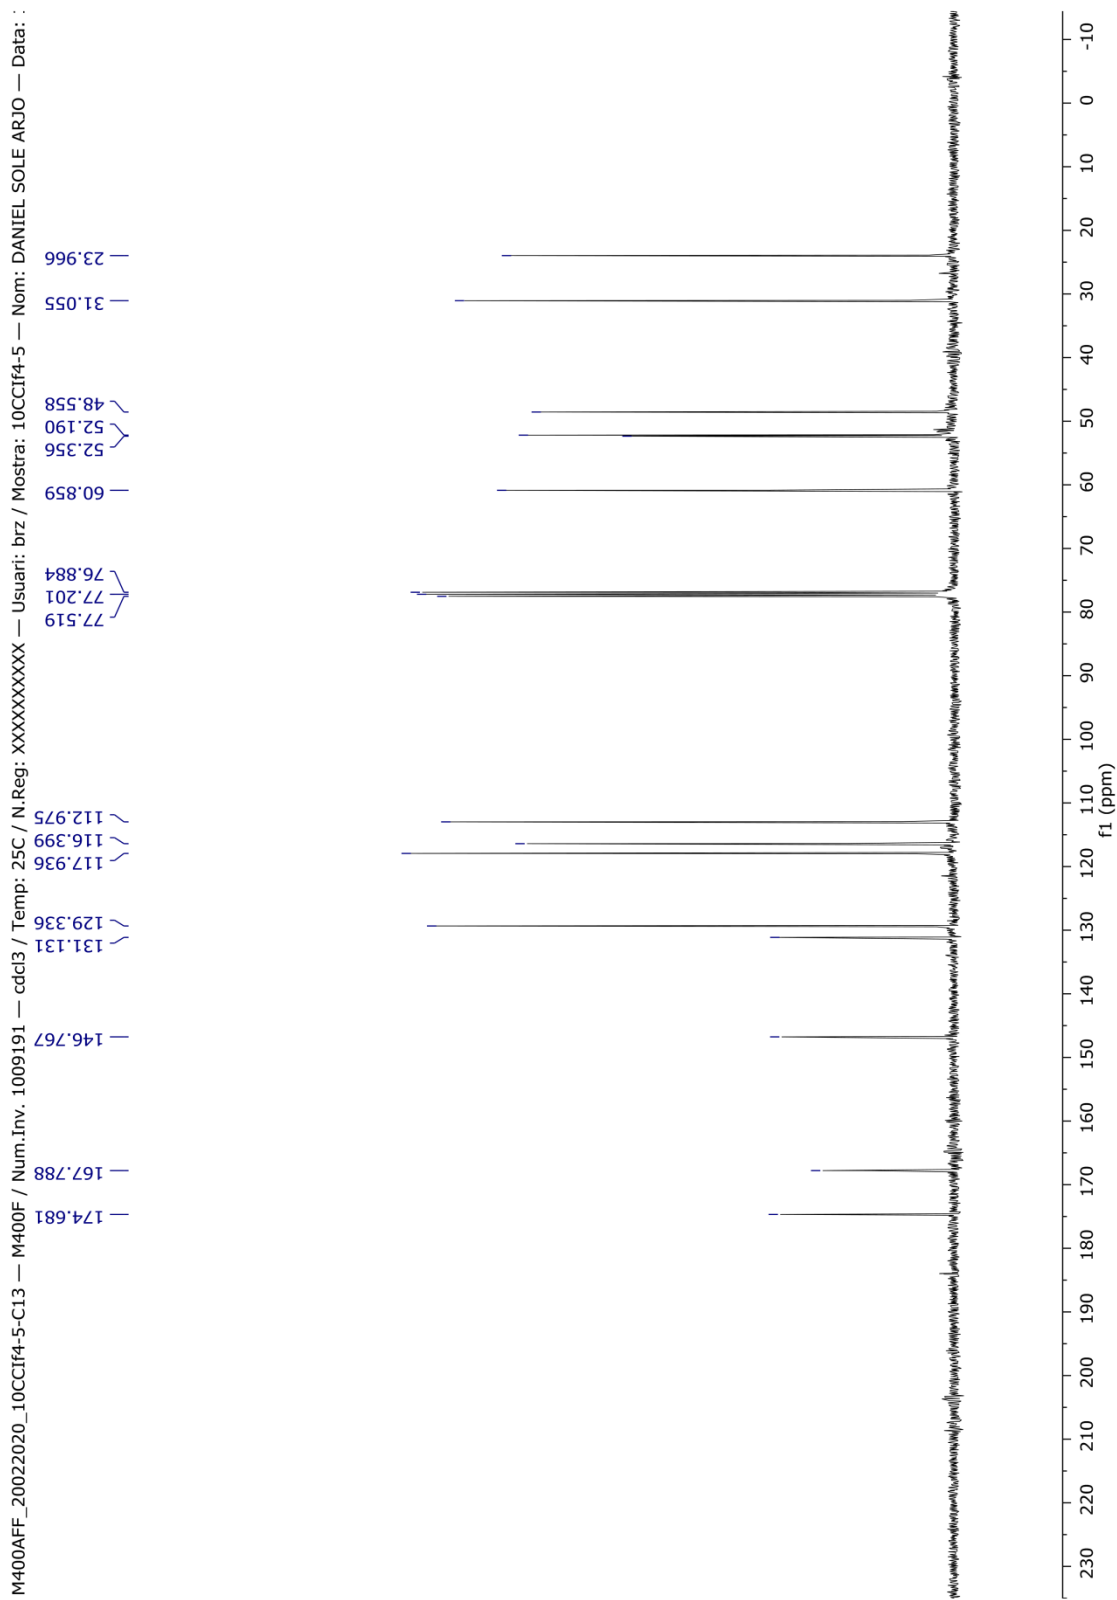

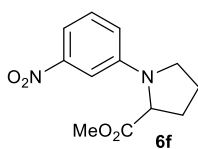

M400AFF\_23092020\_37CCIRF-71-77-H1 — M400F / Num.Inv. 1009191 — cdc13 / Temp: 25C / N.Reg: XXXXXXXXXXXX — Usuari: biz / Mostra: 37CCIRF-71-77 — Nom: CRISTINA CAMPOS

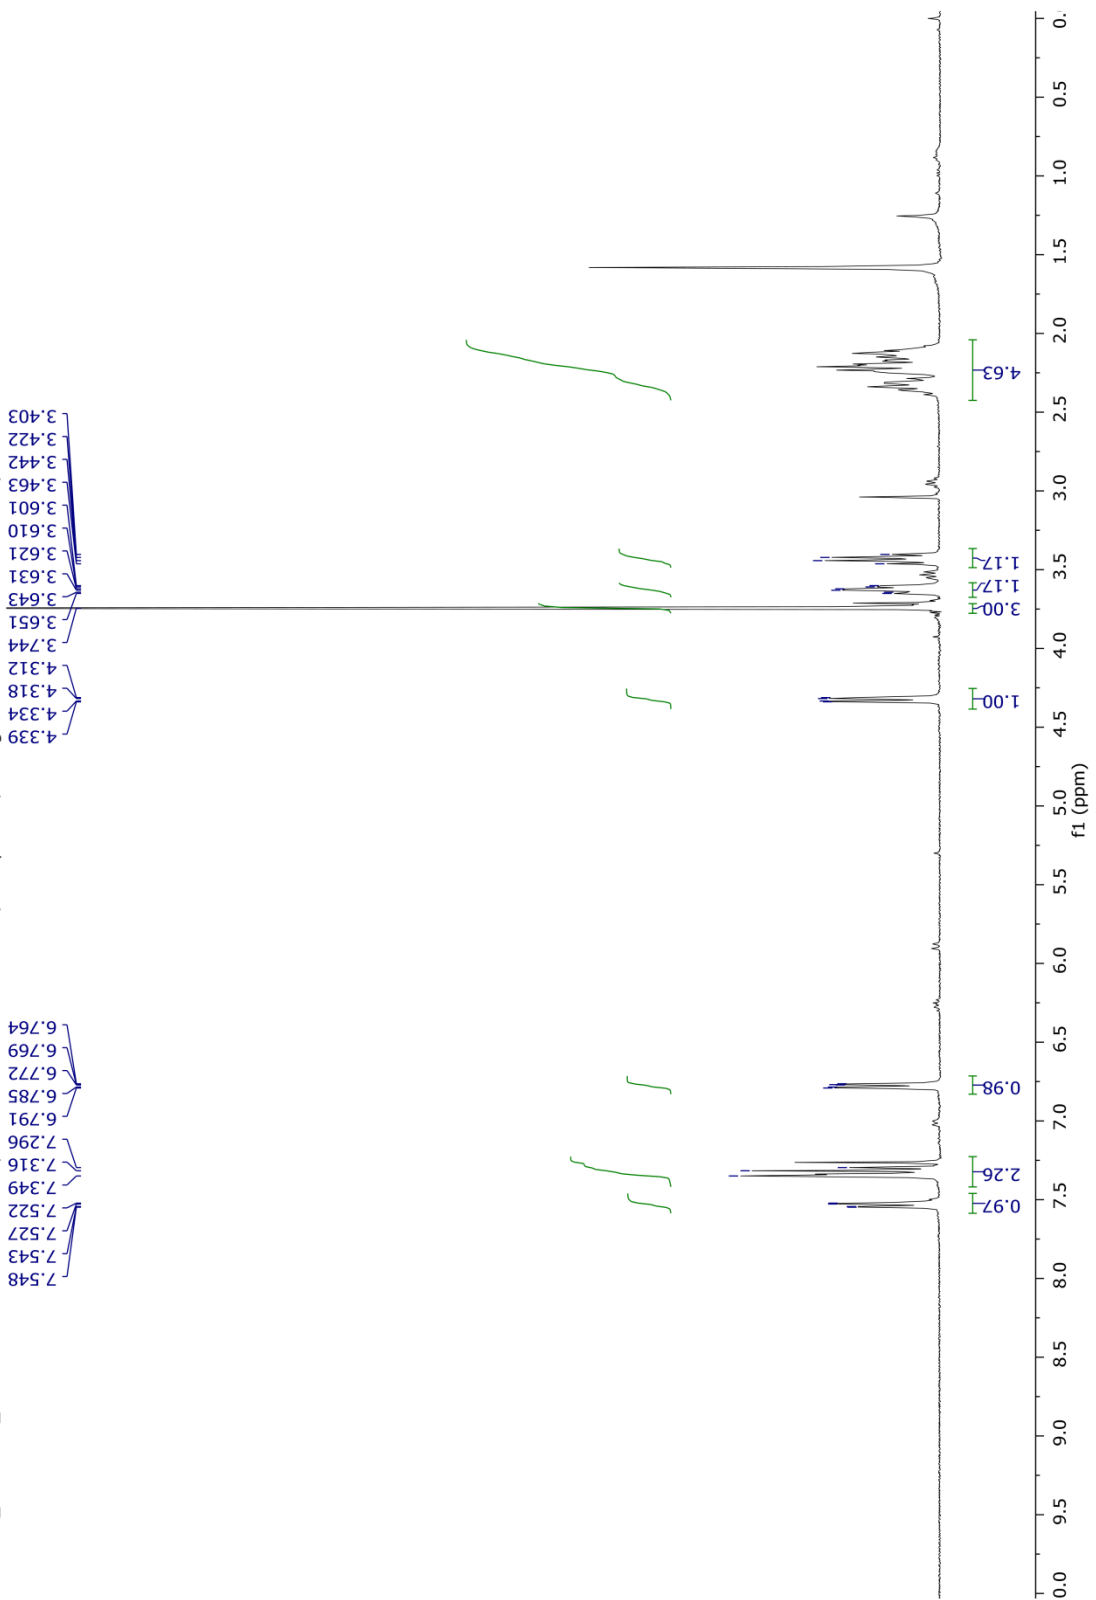

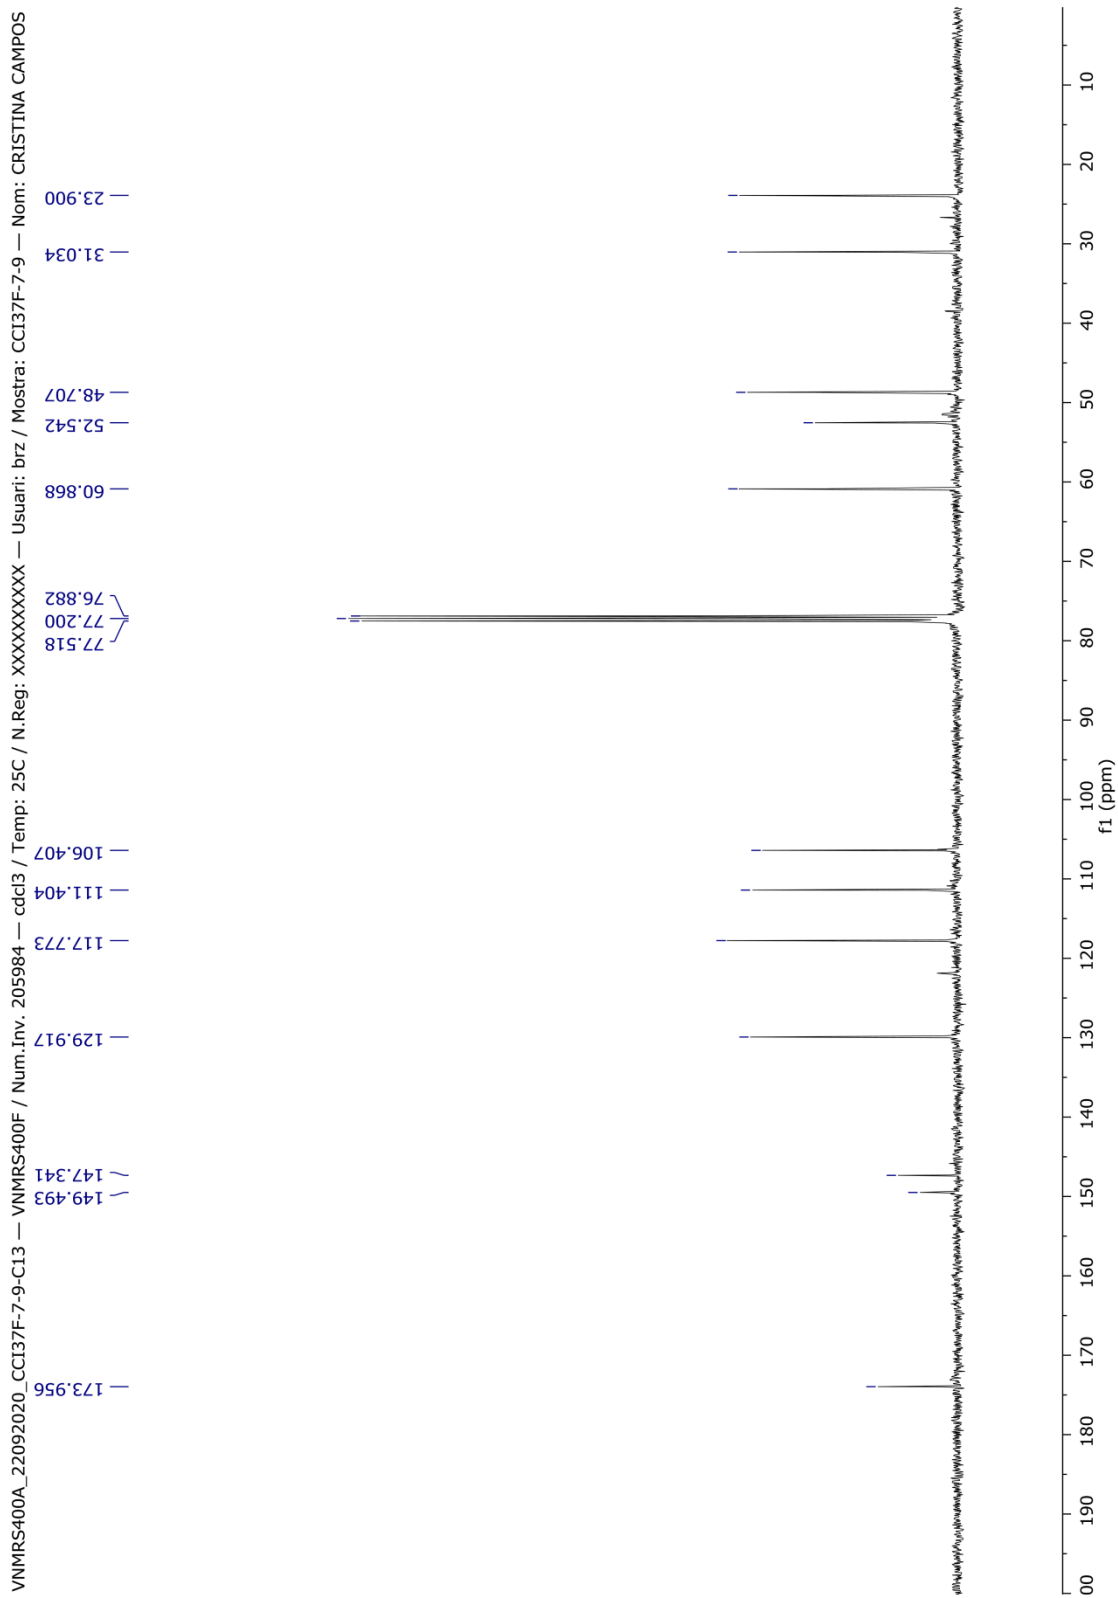

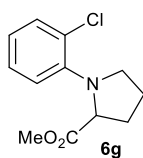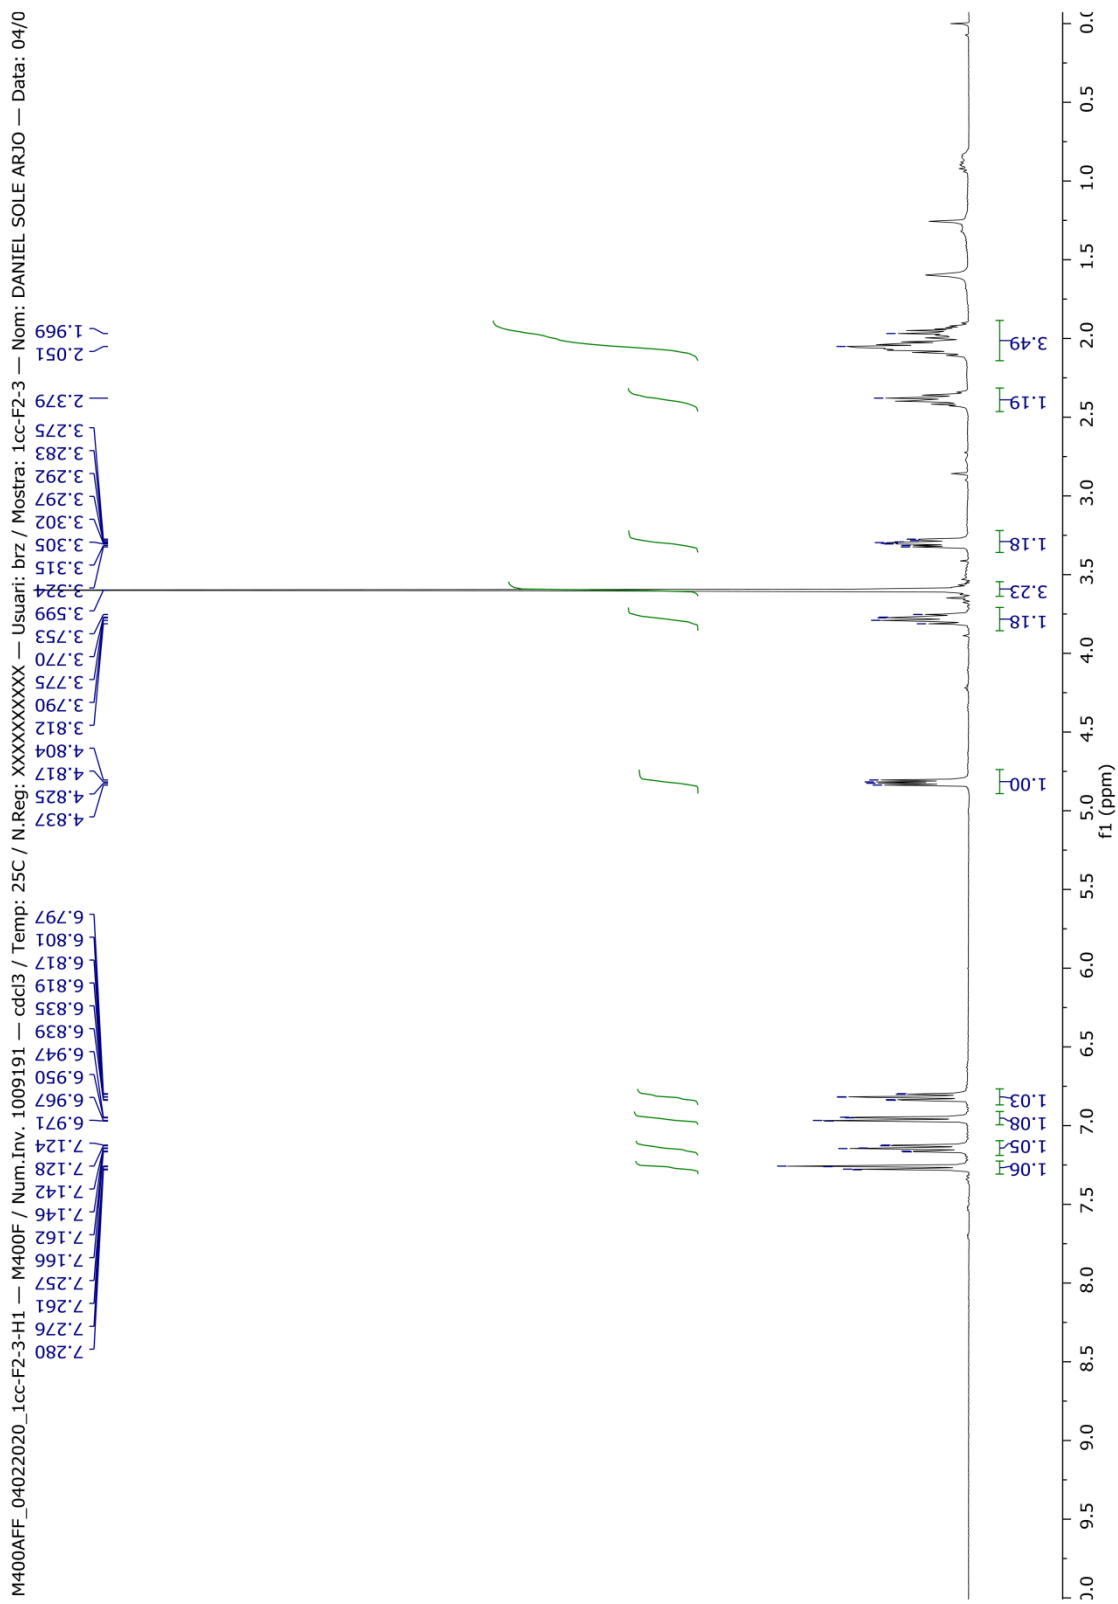

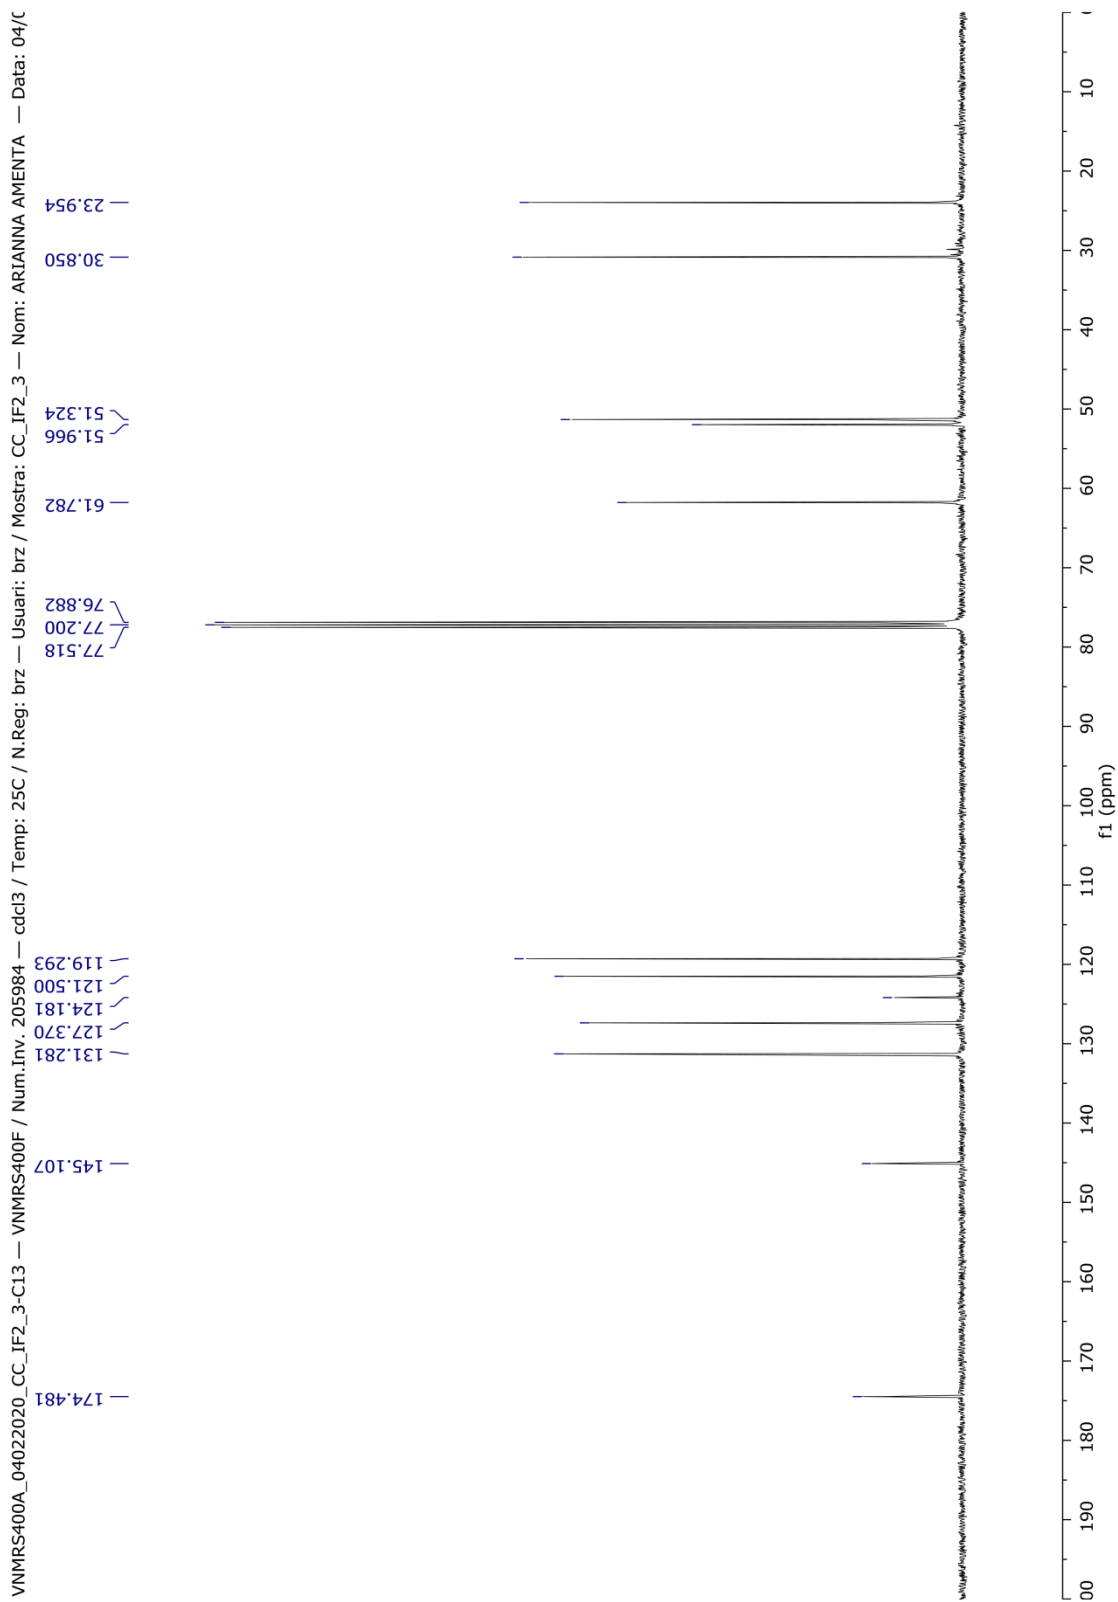

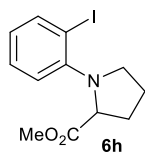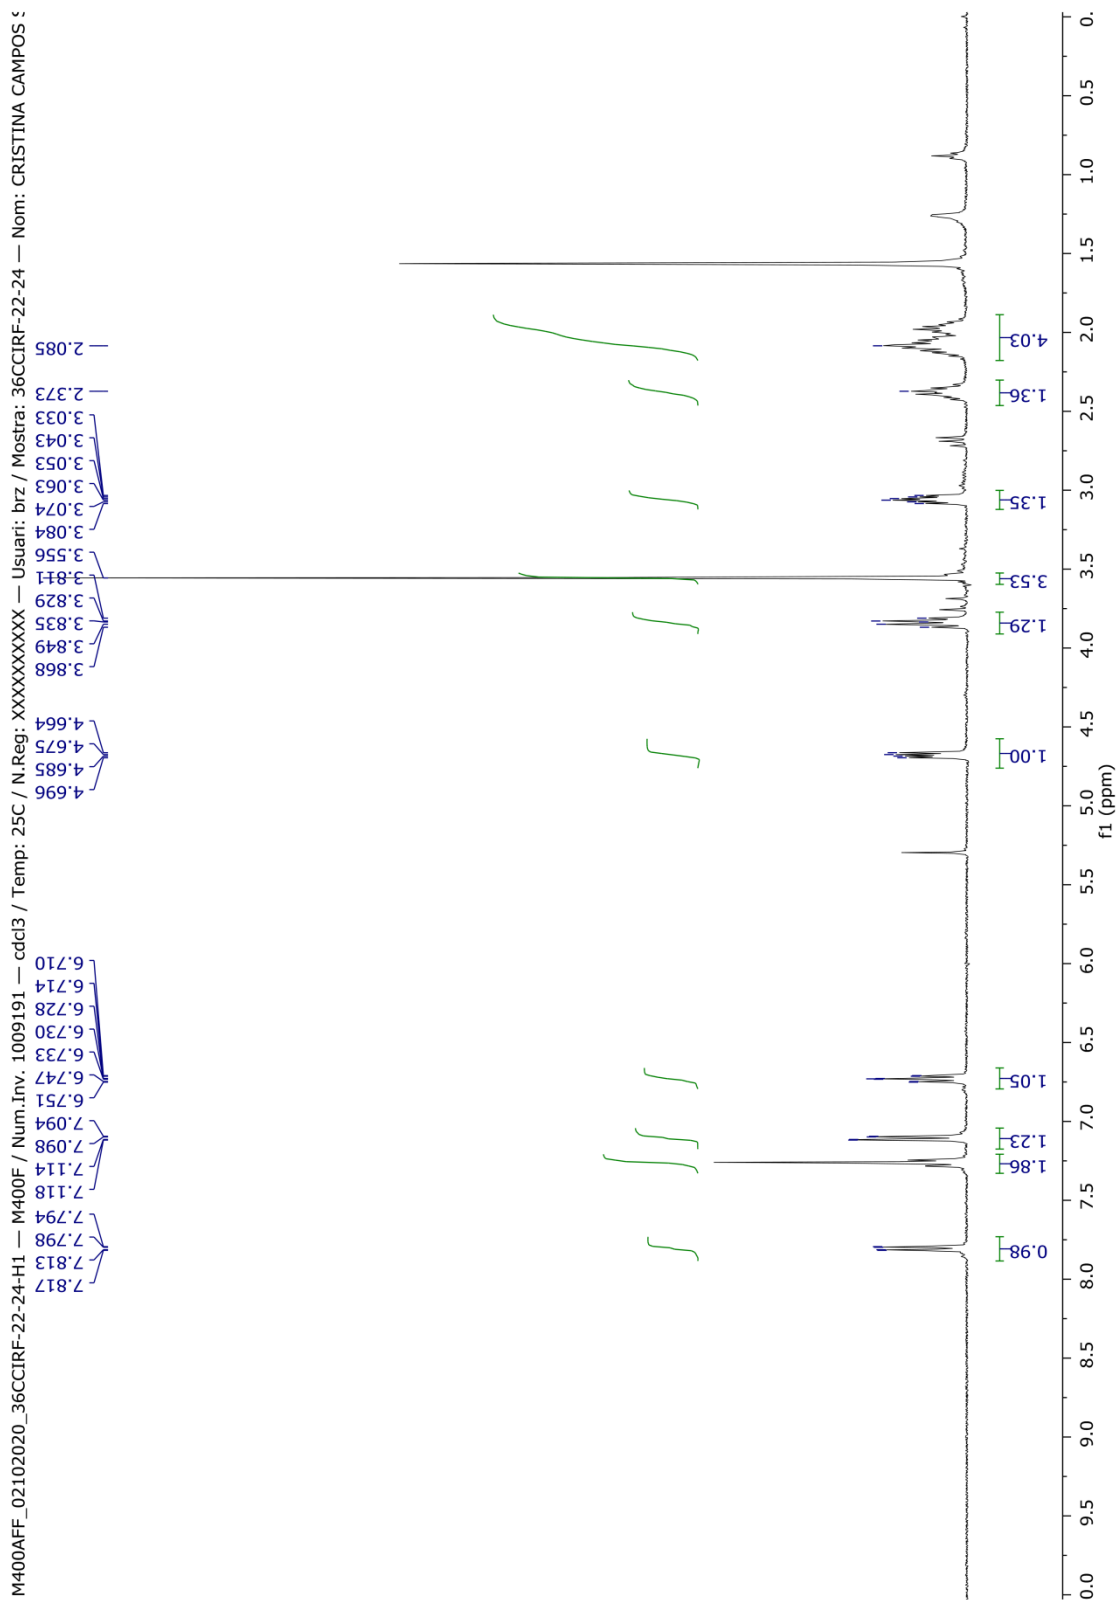

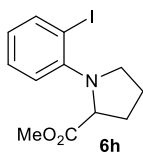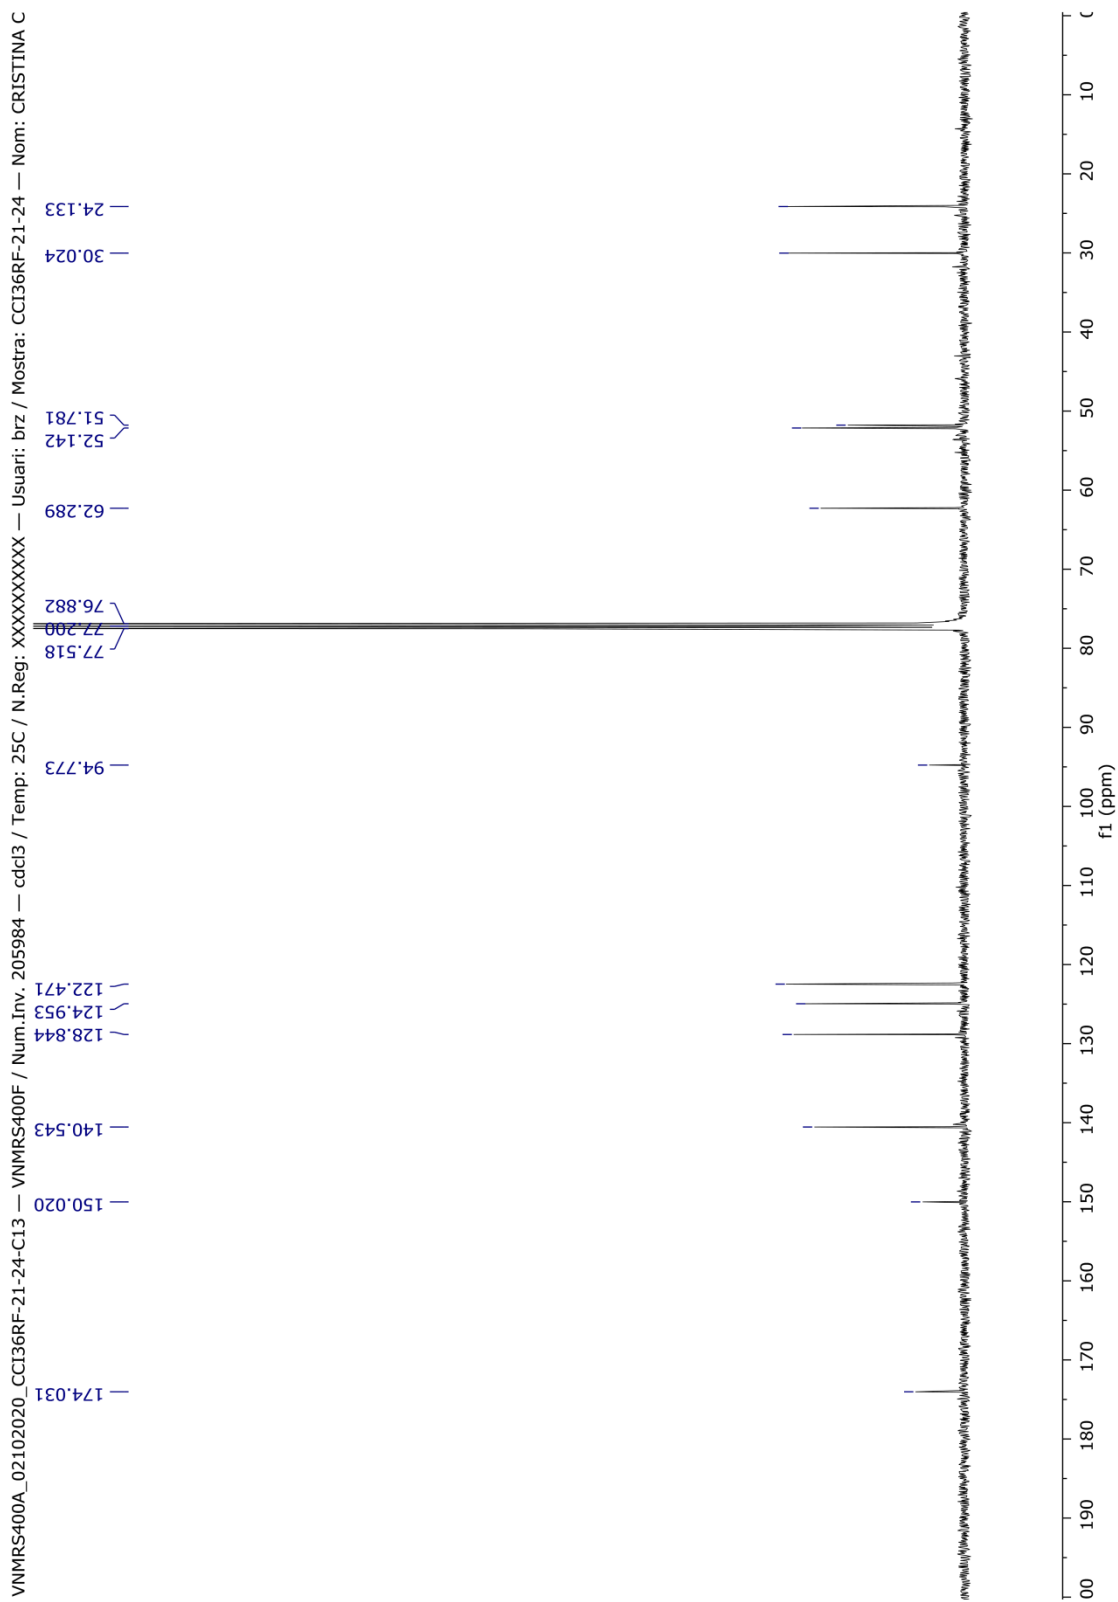



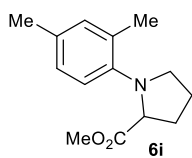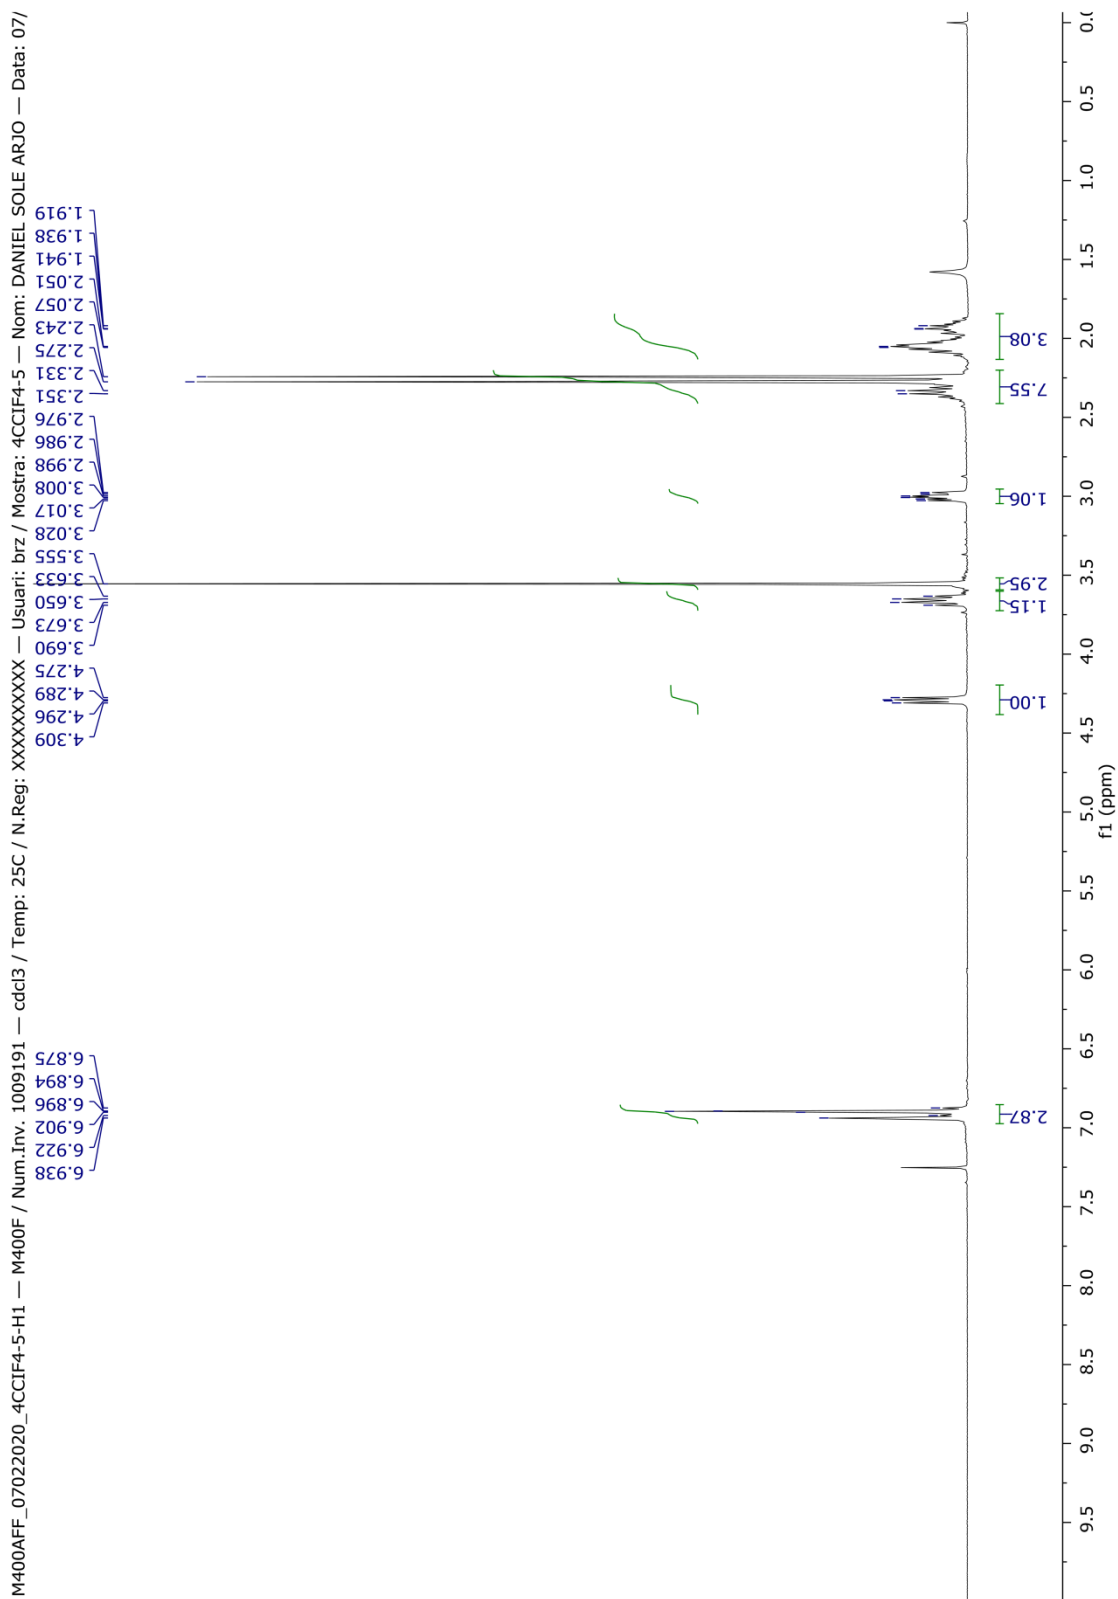

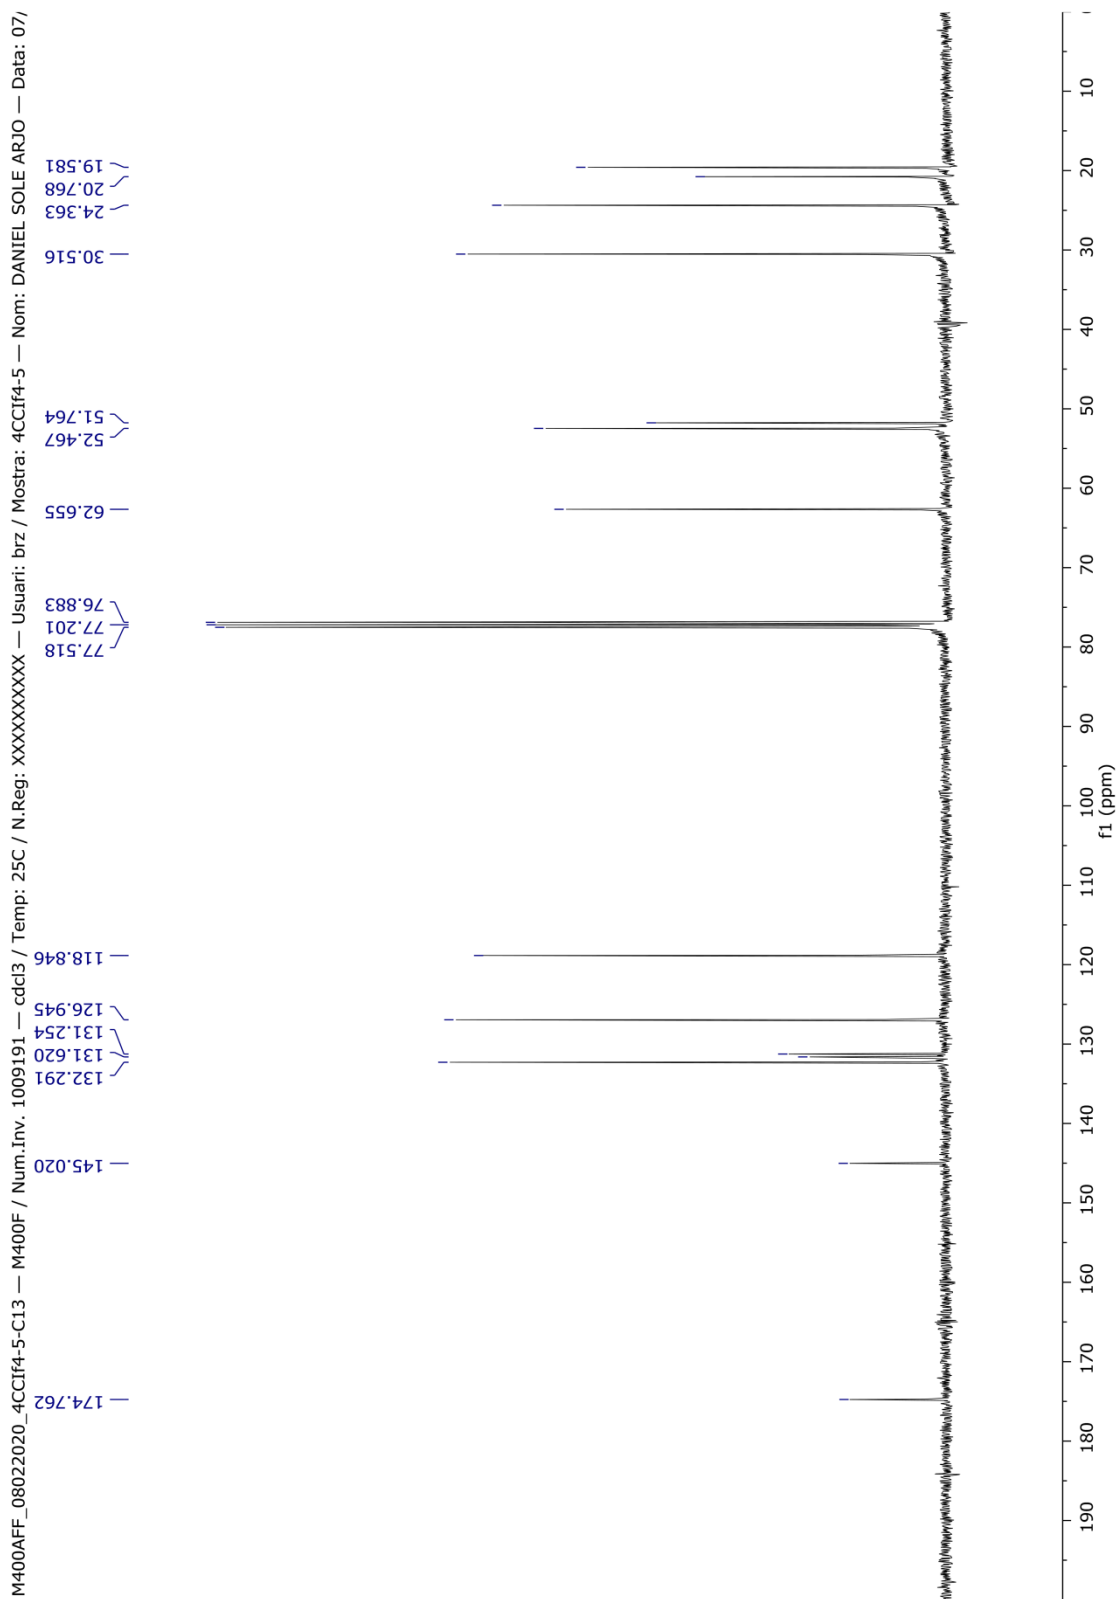

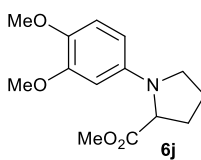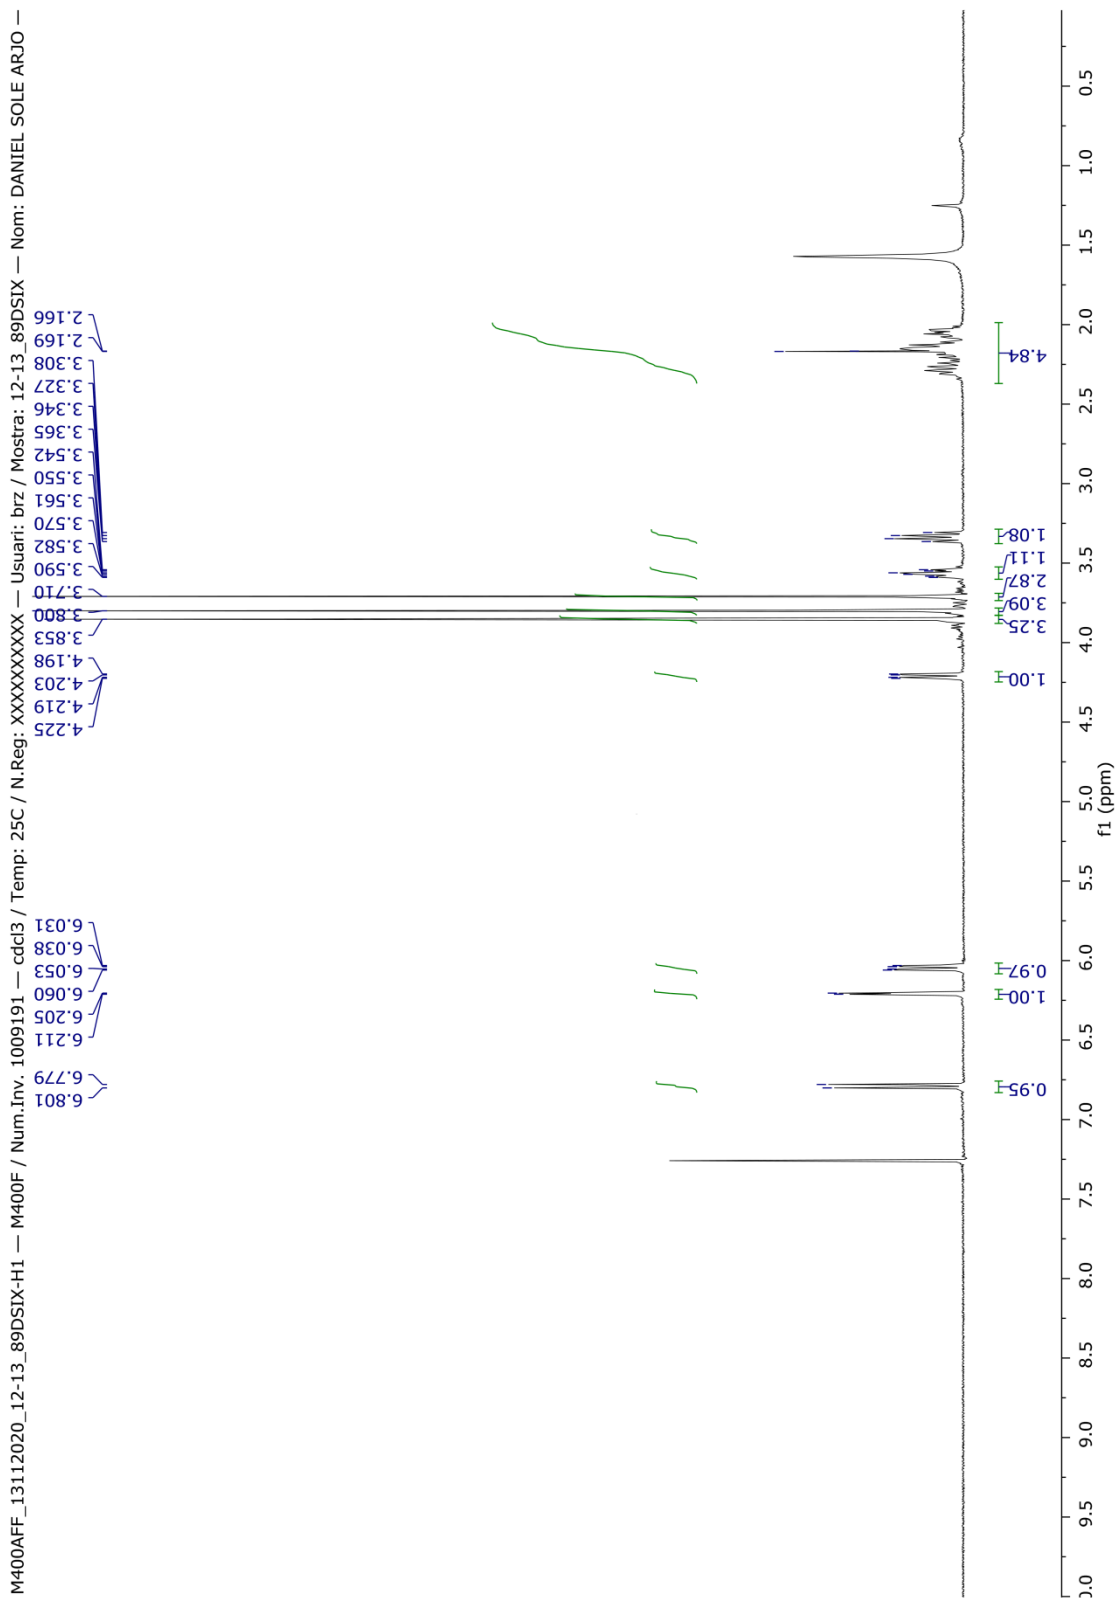

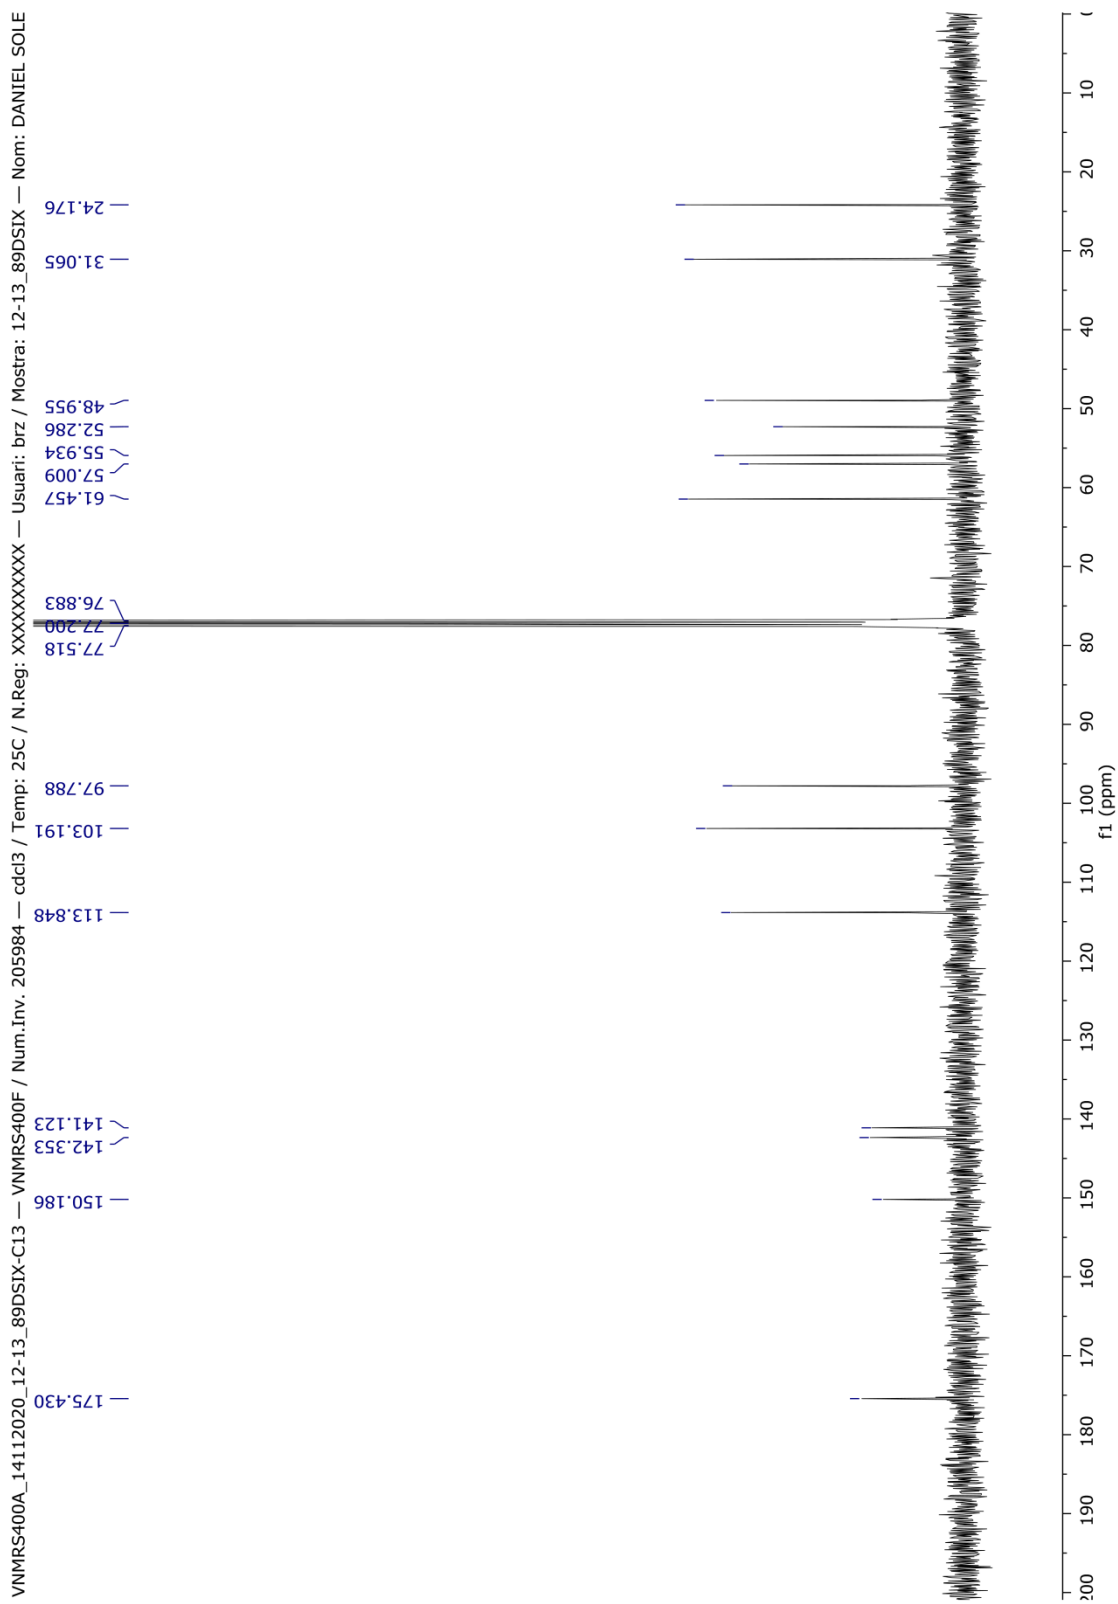

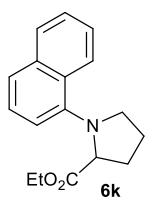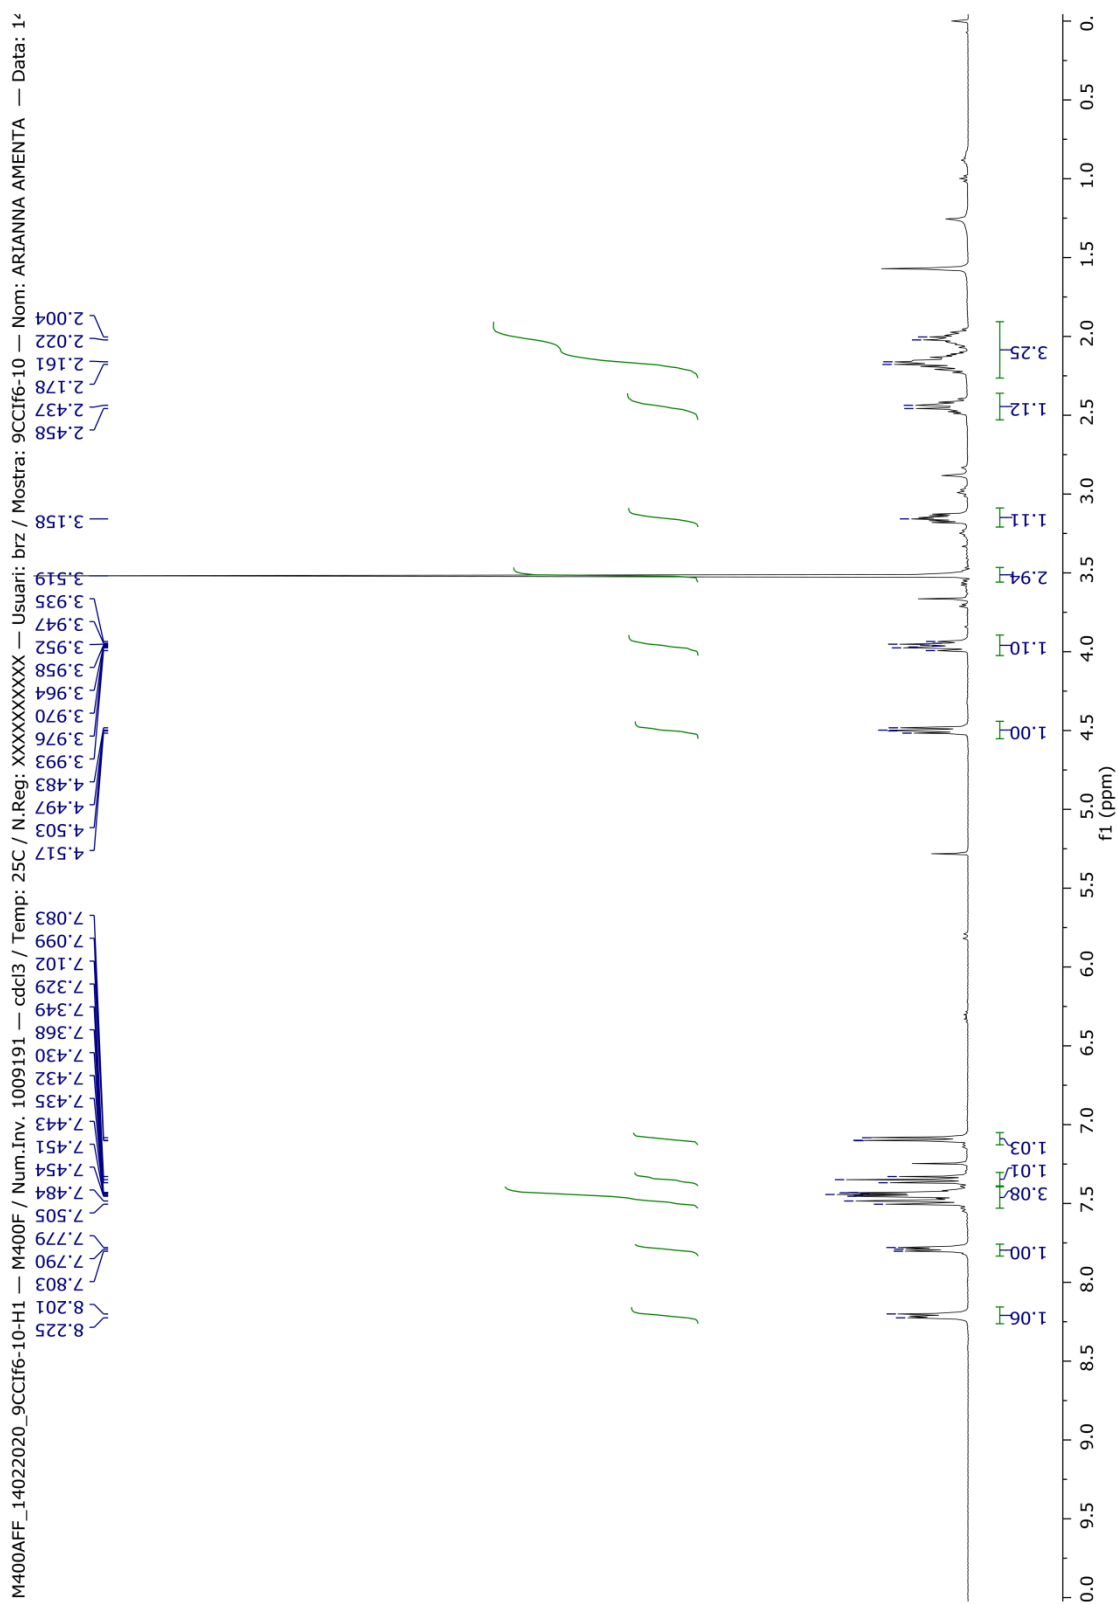

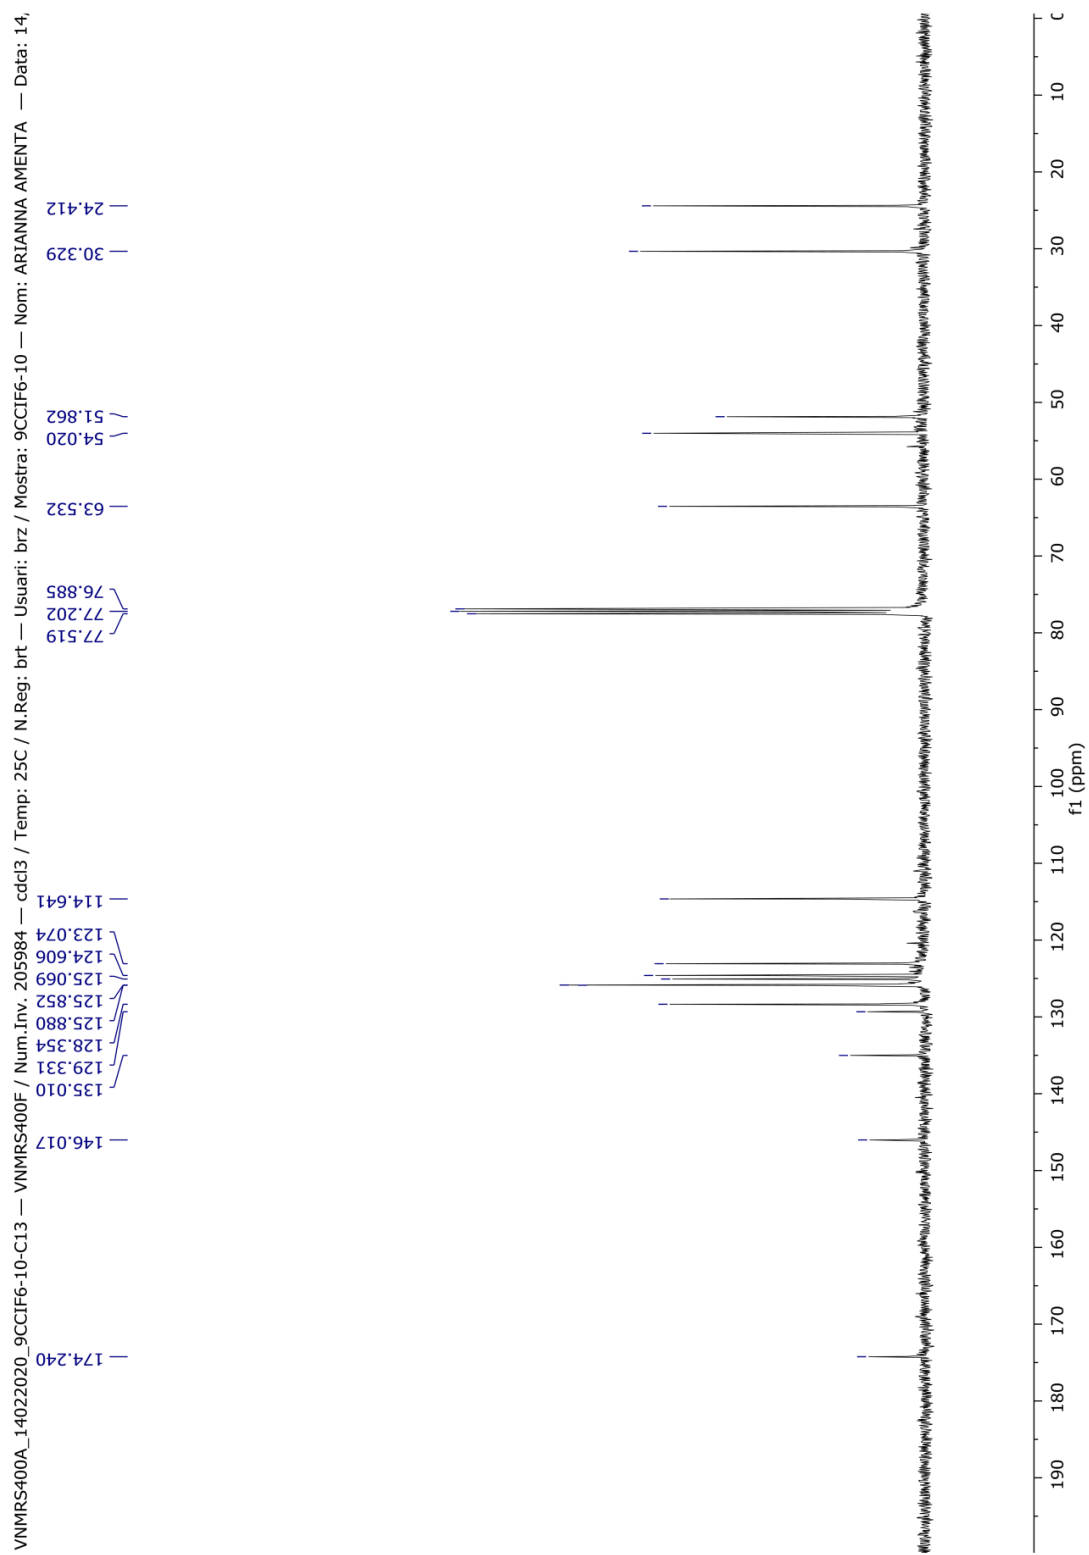

### Cartesian coordinates and total energies

Cartesian coordinates (in Å) and total energies (in a.u.) of all the stationary points discussed in the text. All calculations have been performed at the PCM(solvent)-M06L-D3/def2-TZVPP//PCM(solvent)-B3LYP-D3/def2-SVP level.

**INT0:** E= -7232.361052

|    |              |              |              |
|----|--------------|--------------|--------------|
| C  | -0.311976000 | 1.434155000  | -0.766212000 |
| C  | -1.445356000 | 1.243906000  | 0.253983000  |
| H  | -0.078614000 | 2.507846000  | -0.870283000 |
| H  | -0.733513000 | 1.087303000  | -1.720355000 |
| C  | -2.829574000 | 1.682002000  | -0.181858000 |
| O  | -3.631281000 | 0.768618000  | -0.369959000 |
| O  | -3.058451000 | 2.949304000  | -0.358499000 |
| C  | -4.380235000 | 3.341970000  | -0.815130000 |
| H  | -4.561717000 | 2.921265000  | -1.813204000 |
| H  | -5.137795000 | 2.974719000  | -0.109776000 |
| H  | -4.367239000 | 4.435795000  | -0.845975000 |
| Fe | -2.292865000 | -0.653196000 | 0.435611000  |
| Br | -1.752740000 | -1.599239000 | -1.706343000 |
| Br | -0.951230000 | -1.740395000 | 2.077809000  |
| C  | 0.927553000  | 0.611455000  | -0.428507000 |
| H  | 1.422630000  | 1.004716000  | 0.475056000  |
| H  | 0.609048000  | -0.415949000 | -0.198927000 |
| C  | 1.927960000  | 0.577982000  | -1.590483000 |
| H  | 2.260634000  | 1.595512000  | -1.848517000 |
| H  | 1.417816000  | 0.194219000  | -2.488549000 |
| N  | 3.079162000  | -0.269132000 | -1.331981000 |
| C  | 2.906535000  | -1.695968000 | -1.548515000 |
| H  | 1.929043000  | -1.874875000 | -2.015011000 |
| H  | 3.683260000  | -2.108903000 | -2.216043000 |
| H  | 2.932722000  | -2.268812000 | -0.603505000 |
| C  | 4.163480000  | 0.188665000  | -0.601428000 |
| C  | 5.242302000  | -0.675847000 | -0.278069000 |
| C  | 4.257645000  | 1.531772000  | -0.149327000 |
| C  | 6.347360000  | -0.213579000 | 0.438734000  |
| C  | 5.370059000  | 1.975535000  | 0.565936000  |
| C  | 6.430107000  | 1.114136000  | 0.870239000  |
| H  | 5.225972000  | -1.718053000 | -0.594671000 |
| H  | 3.453001000  | 2.239102000  | -0.347791000 |
| H  | 7.158398000  | -0.912540000 | 0.663013000  |
| H  | 5.400493000  | 3.017583000  | 0.897487000  |
| H  | 7.295750000  | 1.467988000  | 1.434686000  |
| N  | -1.113026000 | 1.687351000  | 1.506390000  |
| N  | -0.790959000 | 1.907909000  | 2.552256000  |

**TS1:** E= -7232.355281

|   |              |             |              |
|---|--------------|-------------|--------------|
| C | -0.305343000 | 1.205274000 | -0.995180000 |
| C | -1.415613000 | 1.076266000 | 0.022656000  |
| H | -0.067021000 | 2.266255000 | -1.186513000 |
| H | -0.761927000 | 0.809174000 | -1.919103000 |
| C | -2.740092000 | 1.715622000 | -0.298307000 |
| O | -3.674058000 | 0.908402000 | -0.277987000 |
| O | -2.832815000 | 2.984683000 | -0.568817000 |
| C | -4.148936000 | 3.521170000 | -0.860707000 |

|    |              |              |              |
|----|--------------|--------------|--------------|
| H  | -4.542133000 | 3.053285000  | -1.773404000 |
| H  | -4.824908000 | 3.322061000  | -0.018030000 |
| H  | -4.004883000 | 4.596759000  | -1.002935000 |
| Fe | -2.290056000 | -0.530334000 | 0.537133000  |
| Br | -2.067084000 | -1.783750000 | -1.463979000 |
| Br | -0.850028000 | -1.486650000 | 2.163182000  |
| C  | 0.938119000  | 0.391276000  | -0.652001000 |
| H  | 1.422634000  | 0.797510000  | 0.251009000  |
| H  | 0.626165000  | -0.635355000 | -0.408950000 |
| C  | 1.954541000  | 0.362023000  | -1.799415000 |
| H  | 2.242264000  | 1.385760000  | -2.086136000 |
| H  | 1.481544000  | -0.073250000 | -2.694136000 |
| N  | 3.143091000  | -0.418516000 | -1.493971000 |
| C  | 3.042000000  | -1.857732000 | -1.666272000 |
| H  | 2.164814000  | -2.085976000 | -2.285378000 |
| H  | 3.928875000  | -2.268647000 | -2.177586000 |
| H  | 2.925793000  | -2.394831000 | -0.705836000 |
| C  | 4.150642000  | 0.102636000  | -0.694942000 |
| C  | 5.208254000  | -0.717875000 | -0.222443000 |
| C  | 4.182772000  | 1.471799000  | -0.318891000 |
| C  | 6.238161000  | -0.189778000 | 0.558340000  |
| C  | 5.219559000  | 1.981711000  | 0.462639000  |
| C  | 6.261793000  | 1.162938000  | 0.911522000  |
| H  | 5.233441000  | -1.778934000 | -0.466618000 |
| H  | 3.390012000  | 2.149872000  | -0.632571000 |
| H  | 7.035035000  | -0.857421000 | 0.898679000  |
| H  | 5.204120000  | 3.042434000  | 0.729595000  |
| H  | 7.067969000  | 1.568289000  | 1.527088000  |
| N  | -0.844113000 | 1.862190000  | 1.365420000  |
| N  | -0.347772000 | 1.821900000  | 2.357943000  |

**INT1:** E= -7122.853113

|   |              |              |              |
|---|--------------|--------------|--------------|
| C | 0.206537000  | -0.287075000 | 2.032431000  |
| C | 0.292052000  | 0.198096000  | 0.640291000  |
| C | -0.028031000 | -1.809033000 | 2.070598000  |
| N | -1.636541000 | -1.478452000 | 0.182605000  |
| C | -1.391580000 | -2.156658000 | 1.465351000  |
| H | -0.586861000 | 0.245442000  | 2.584104000  |
| H | 0.787315000  | -2.304115000 | 1.522513000  |
| H | -1.468388000 | -3.249108000 | 1.315873000  |
| H | -2.183211000 | -1.885245000 | 2.171084000  |
| H | 0.009176000  | -2.173582000 | 3.108883000  |
| H | 1.173139000  | -0.060789000 | 2.514254000  |
| C | -1.000223000 | -2.135144000 | -0.954181000 |
| H | -0.000406000 | -2.477321000 | -0.664734000 |
| H | -1.589515000 | -2.998431000 | -1.313924000 |
| H | -0.878230000 | -1.424996000 | -1.784154000 |
| C | -2.883393000 | -0.854102000 | -0.043824000 |
| C | -3.425580000 | -0.756241000 | -1.344418000 |
| C | -3.601153000 | -0.243718000 | 1.011083000  |
| C | -4.627935000 | -0.080306000 | -1.572210000 |
| C | -4.803032000 | 0.419304000  | 0.773252000  |
| C | -5.330603000 | 0.510343000  | -0.519959000 |
| H | -2.920582000 | -1.209359000 | -2.194886000 |
| H | -3.204574000 | -0.250429000 | 2.025190000  |
| H | -5.018150000 | -0.026589000 | -2.591762000 |
| H | -5.326398000 | 0.883214000  | 1.613076000  |
| H | -6.271017000 | 1.034881000  | -0.702179000 |
| C | -0.527624000 | 1.231709000  | 0.000286000  |
| O | -0.143730000 | 1.497479000  | -1.158356000 |



|    |              |              |              |
|----|--------------|--------------|--------------|
| O  | -1.516577000 | 1.819245000  | 0.615329000  |
| C  | -2.312752000 | 2.772411000  | -0.124242000 |
| H  | -1.662996000 | 3.523957000  | -0.592194000 |
| H  | -2.893172000 | 2.238470000  | -0.889733000 |
| H  | -2.983685000 | 3.231414000  | 0.608667000  |
| Fe | 1.480565000  | 0.201892000  | -0.653699000 |
| Br | 2.797231000  | -1.756420000 | -0.480236000 |
| Br | 2.855941000  | 1.888170000  | 0.272388000  |

**TS2:** E= -7122.847594

|    |              |              |              |
|----|--------------|--------------|--------------|
| C  | 0.094288000  | -0.276533000 | 2.019791000  |
| C  | 0.053964000  | 0.034875000  | 0.567999000  |
| C  | 0.047924000  | -1.800112000 | 2.175125000  |
| N  | -1.387930000 | -1.533501000 | 0.177323000  |
| C  | -1.212240000 | -2.283380000 | 1.452460000  |
| H  | -0.732991000 | 0.208398000  | 2.565594000  |
| H  | 0.949122000  | -2.234089000 | 1.716752000  |
| H  | -1.165511000 | -3.359568000 | 1.225007000  |
| H  | -2.094746000 | -2.128086000 | 2.081181000  |
| H  | 0.023203000  | -2.105456000 | 3.231624000  |
| H  | 1.041790000  | 0.126295000  | 2.413210000  |
| C  | -0.793380000 | -2.241625000 | -0.964794000 |
| H  | 0.201675000  | -2.599272000 | -0.679792000 |
| H  | -1.423512000 | -3.092461000 | -1.271899000 |
| H  | -0.677077000 | -1.559531000 | -1.816733000 |
| C  | -2.677131000 | -0.939180000 | -0.054696000 |
| C  | -3.225561000 | -0.869122000 | -1.347832000 |
| C  | -3.382917000 | -0.335358000 | 1.005137000  |
| C  | -4.445636000 | -0.221961000 | -1.567161000 |
| C  | -4.600649000 | 0.303354000  | 0.777319000  |
| C  | -5.143258000 | 0.365681000  | -0.510456000 |
| H  | -2.717273000 | -1.314924000 | -2.199836000 |
| H  | -2.974934000 | -0.332820000 | 2.014750000  |
| H  | -4.850909000 | -0.186028000 | -2.581159000 |
| H  | -5.123302000 | 0.765363000  | 1.618139000  |
| H  | -6.096720000 | 0.868559000  | -0.686234000 |
| C  | -0.657592000 | 1.154597000  | -0.069405000 |
| O  | -0.362900000 | 1.318702000  | -1.269753000 |
| O  | -1.431004000 | 1.952923000  | 0.620151000  |
| C  | -2.002485000 | 3.088441000  | -0.063778000 |
| H  | -1.203207000 | 3.695854000  | -0.510127000 |
| H  | -2.689145000 | 2.738801000  | -0.847636000 |
| H  | -2.546364000 | 3.654377000  | 0.699678000  |
| Fe | 1.353134000  | 0.154497000  | -0.688066000 |
| Br | 2.861229000  | -1.669493000 | -0.431420000 |
| Br | 2.528291000  | 1.998667000  | 0.270119000  |

**INT2:** E= -7122.855269

|   |              |              |              |
|---|--------------|--------------|--------------|
| C | -0.415721000 | 0.133098000  | 1.801500000  |
| C | -0.358858000 | 0.124162000  | 0.280735000  |
| C | -1.116583000 | -1.189502000 | 2.190527000  |
| N | -1.445047000 | -0.874427000 | -0.172858000 |
| C | -1.246521000 | -1.961830000 | 0.884830000  |
| H | -0.965175000 | 1.003528000  | 2.191366000  |
| H | -0.540364000 | -1.776494000 | 2.918166000  |
| H | -0.306892000 | -2.460378000 | 0.618934000  |
| H | -2.075282000 | -2.675498000 | 0.840898000  |
| H | -2.108288000 | -0.997299000 | 2.624732000  |
| H | 0.609161000  | 0.197320000  | 2.188048000  |

|    |              |              |              |
|----|--------------|--------------|--------------|
| C  | -1.194650000 | -1.412142000 | -1.555264000 |
| H  | -0.201849000 | -1.881350000 | -1.575476000 |
| H  | -1.943231000 | -2.174793000 | -1.790792000 |
| H  | -1.249715000 | -0.584776000 | -2.268513000 |
| C  | -2.858443000 | -0.350374000 | -0.094108000 |
| C  | -3.908625000 | -1.247476000 | -0.334263000 |
| C  | -3.134376000 | 0.981325000  | 0.216625000  |
| C  | -5.230633000 | -0.806545000 | -0.269199000 |
| C  | -4.465267000 | 1.413305000  | 0.280260000  |
| C  | -5.515110000 | 0.527821000  | 0.038072000  |
| H  | -3.716755000 | -2.293884000 | -0.572760000 |
| H  | -2.346443000 | 1.699844000  | 0.418789000  |
| H  | -6.039239000 | -1.515259000 | -0.460230000 |
| H  | -4.669781000 | 2.457653000  | 0.525591000  |
| H  | -6.550348000 | 0.871924000  | 0.089762000  |
| C  | -0.168903000 | 1.349041000  | -0.488134000 |
| O  | 0.233307000  | 1.262215000  | -1.685429000 |
| O  | -0.261891000 | 2.510154000  | 0.149095000  |
| C  | 0.267595000  | 3.671172000  | -0.514795000 |
| H  | 1.331637000  | 3.512576000  | -0.736065000 |
| H  | -0.286997000 | 3.864521000  | -1.444165000 |
| H  | 0.139548000  | 4.501542000  | 0.188911000  |
| Fe | 1.380942000  | -0.089707000 | -0.664759000 |
| Br | 2.281979000  | -2.249757000 | -0.135583000 |
| Br | 2.901910000  | 1.367840000  | 0.490054000  |

**TS3:** E= -7122.804495

|   |              |              |              |
|---|--------------|--------------|--------------|
| C | 0.014844000  | 0.222079000  | -2.002953000 |
| C | 0.336118000  | 0.218921000  | -0.517195000 |
| C | 0.116564000  | -1.259447000 | -2.395710000 |
| N | 1.366903000  | -0.803953000 | -0.362534000 |
| C | 1.067094000  | -1.886916000 | -1.350238000 |
| H | 0.798330000  | 0.816314000  | -2.508278000 |
| H | -0.871216000 | -1.733073000 | -2.328250000 |
| H | 0.585149000  | -2.730665000 | -0.836177000 |
| H | 2.015896000  | -2.232585000 | -1.778741000 |
| H | 0.495597000  | -1.386939000 | -3.419060000 |
| H | -0.955382000 | 0.675956000  | -2.227748000 |
| C | 0.320694000  | -1.197592000 | 1.480344000  |
| H | -0.611595000 | -0.916898000 | 2.159663000  |
| H | 0.358858000  | -2.287928000 | 1.391073000  |
| H | 1.185798000  | -0.752446000 | 1.982738000  |
| C | 2.740659000  | -0.508733000 | -0.119979000 |
| C | 3.535868000  | -1.528396000 | 0.435063000  |
| C | 3.319076000  | 0.736757000  | -0.412649000 |
| C | 4.886148000  | -1.300665000 | 0.698264000  |
| C | 4.672368000  | 0.956594000  | -0.136716000 |
| C | 5.460661000  | -0.054449000 | 0.419350000  |
| H | 3.084582000  | -2.495190000 | 0.667137000  |
| H | 2.734733000  | 1.527631000  | -0.879424000 |
| H | 5.490958000  | -2.099870000 | 1.133279000  |
| H | 5.112453000  | 1.928242000  | -0.373617000 |
| H | 6.517098000  | 0.124501000  | 0.631421000  |
| C | 0.433983000  | 1.515742000  | 0.214812000  |
| O | 0.085379000  | 1.522247000  | 1.405573000  |
| O | 0.672292000  | 2.600628000  | -0.479055000 |
| C | 0.399075000  | 3.871652000  | 0.153875000  |
| H | -0.662572000 | 3.905786000  | 0.435243000  |
| H | 1.030893000  | 3.995360000  | 1.043710000  |
| H | 0.631999000  | 4.632504000  | -0.598290000 |

|    |              |              |              |
|----|--------------|--------------|--------------|
| Fe | -1.131435000 | -0.128085000 | 0.822734000  |
| Br | -2.334143000 | -2.097898000 | 0.179348000  |
| Br | -2.722225000 | 1.420495000  | -0.166713000 |

**TS3'** : E= -7122.775472

|    |              |              |              |
|----|--------------|--------------|--------------|
| C  | -0.339336000 | -1.775851000 | 1.935983000  |
| C  | -0.004004000 | -1.032847000 | 0.668214000  |
| C  | 0.060115000  | -0.728634000 | 2.980942000  |
| N  | 1.240627000  | -0.263821000 | 0.912140000  |
| C  | 1.371517000  | -0.176829000 | 2.418031000  |
| H  | 0.273357000  | -2.689862000 | 2.042364000  |
| H  | -0.708175000 | 0.060084000  | 3.022830000  |
| H  | 1.591508000  | 0.855424000  | 2.722884000  |
| H  | 2.219885000  | -0.807980000 | 2.717960000  |
| H  | 0.196030000  | -1.131624000 | 3.994016000  |
| H  | -1.398680000 | -2.058073000 | 1.967829000  |
| C  | 0.775900000  | 1.635100000  | 0.265795000  |
| H  | 0.265933000  | 1.878148000  | 1.190643000  |
| H  | 1.810618000  | 1.930452000  | 0.131927000  |
| H  | 0.303132000  | 1.286049000  | -0.660220000 |
| C  | 2.474895000  | -0.665494000 | 0.266073000  |
| C  | 3.611277000  | 0.137212000  | 0.470542000  |
| C  | 2.589538000  | -1.822638000 | -0.515463000 |
| C  | 4.829631000  | -0.197564000 | -0.121135000 |
| C  | 3.813710000  | -2.148494000 | -1.109372000 |
| C  | 4.936012000  | -1.338857000 | -0.923047000 |
| H  | 3.551100000  | 1.023684000  | 1.104482000  |
| H  | 1.746639000  | -2.497049000 | -0.651871000 |
| H  | 5.699726000  | 0.441230000  | 0.047439000  |
| H  | 3.883782000  | -3.053976000 | -1.716731000 |
| H  | 5.888212000  | -1.598036000 | -1.391140000 |
| C  | -0.334548000 | -1.517307000 | -0.649624000 |
| O  | -0.377921000 | -0.685274000 | -1.613246000 |
| O  | -0.764021000 | -2.762053000 | -0.768430000 |
| C  | -1.503594000 | -3.098654000 | -1.958637000 |
| H  | -2.407315000 | -2.474815000 | -2.014961000 |
| H  | -0.883887000 | -2.946209000 | -2.852720000 |
| H  | -1.771969000 | -4.155590000 | -1.852095000 |
| Fe | -1.293958000 | 0.277160000  | -0.137525000 |
| Br | -3.450916000 | -0.629167000 | 0.122459000  |
| Br | 0.026558000  | 3.901809000  | -0.520413000 |

**INT3** : E= -7122.871024

|   |              |              |              |
|---|--------------|--------------|--------------|
| C | 0.164761000  | 0.486239000  | 2.508698000  |
| C | -0.283546000 | 0.568786000  | 1.074541000  |
| C | 0.041031000  | -1.007282000 | 2.847852000  |
| N | -1.065699000 | -0.556440000 | 0.734483000  |
| C | -1.002200000 | -1.550968000 | 1.860031000  |
| H | -0.524306000 | 1.106211000  | 3.109299000  |
| H | 1.002785000  | -1.511154000 | 2.694133000  |
| H | -0.736448000 | -2.536812000 | 1.457618000  |
| H | -2.008579000 | -1.599478000 | 2.301037000  |
| H | -0.272772000 | -1.171567000 | 3.887393000  |
| H | 1.176378000  | 0.891778000  | 2.646810000  |
| C | -0.036069000 | -0.712568000 | -2.055616000 |
| H | 0.776764000  | -0.546969000 | -2.780117000 |
| H | -0.312637000 | -1.773006000 | -2.007203000 |
| H | -0.899492000 | -0.074030000 | -2.278293000 |
| C | -2.336434000 | -0.500874000 | 0.062013000  |

|    |              |              |              |
|----|--------------|--------------|--------------|
| C  | -2.758668000 | -1.634395000 | -0.644503000 |
| C  | -3.174190000 | 0.616587000  | 0.161329000  |
| C  | -4.004621000 | -1.636690000 | -1.273124000 |
| C  | -4.415862000 | 0.611030000  | -0.480290000 |
| C  | -4.833323000 | -0.511152000 | -1.201960000 |
| H  | -2.106408000 | -2.506390000 | -0.703610000 |
| H  | -2.879959000 | 1.481257000  | 0.757877000  |
| H  | -4.326031000 | -2.521849000 | -1.826767000 |
| H  | -5.063724000 | 1.487041000  | -0.400790000 |
| H  | -5.805609000 | -0.512493000 | -1.699787000 |
| C  | -0.473186000 | 1.858339000  | 0.368326000  |
| O  | -0.408096000 | 1.858664000  | -0.856623000 |
| O  | -0.562585000 | 2.930067000  | 1.124503000  |
| C  | -0.521849000 | 4.210418000  | 0.455109000  |
| H  | 0.403133000  | 4.290289000  | -0.132621000 |
| H  | -1.391387000 | 4.314898000  | -0.208665000 |
| H  | -0.547565000 | 4.962767000  | 1.250223000  |
| Fe | 0.801600000  | -0.143304000 | -0.380905000 |
| Br | 1.825006000  | -2.192638000 | 0.125941000  |
| Br | 2.737981000  | 1.071090000  | -0.855709000 |

**TS4:** E= -7122.828284

|    |              |              |              |
|----|--------------|--------------|--------------|
| C  | 0.173330000  | 1.350493000  | 2.548488000  |
| C  | -0.189736000 | 1.165486000  | 1.108425000  |
| C  | -0.048393000 | -0.074849000 | 3.091073000  |
| N  | -1.117676000 | 0.081853000  | 0.941091000  |
| C  | -1.241166000 | -0.590038000 | 2.278882000  |
| H  | -0.506490000 | 2.072821000  | 3.034922000  |
| H  | 0.840473000  | -0.691781000 | 2.888877000  |
| H  | -1.250631000 | -1.679641000 | 2.149764000  |
| H  | -2.197594000 | -0.275719000 | 2.725436000  |
| H  | -0.250255000 | -0.107641000 | 4.170279000  |
| H  | 1.202930000  | 1.713251000  | 2.664741000  |
| C  | 0.002471000  | -1.447566000 | -2.003909000 |
| H  | 0.727352000  | -0.703402000 | -2.347406000 |
| H  | 0.123904000  | -2.408868000 | -2.501915000 |
| H  | -1.033217000 | -1.110879000 | -1.922363000 |
| C  | -2.354504000 | 0.196182000  | 0.210819000  |
| C  | -2.983949000 | -0.987192000 | -0.199946000 |
| C  | -2.939202000 | 1.435644000  | -0.068762000 |
| C  | -4.194144000 | -0.926495000 | -0.894268000 |
| C  | -4.147332000 | 1.488112000  | -0.770307000 |
| C  | -4.778745000 | 0.311378000  | -1.185402000 |
| H  | -2.513573000 | -1.948680000 | 0.015003000  |
| H  | -2.457885000 | 2.356034000  | 0.265297000  |
| H  | -4.678197000 | -1.852329000 | -1.214156000 |
| H  | -4.598624000 | 2.459021000  | -0.988752000 |
| H  | -5.723013000 | 0.358281000  | -1.732701000 |
| C  | 0.188683000  | 1.900962000  | -0.048110000 |
| O  | -0.006573000 | 1.350862000  | -1.177613000 |
| O  | 0.840063000  | 3.043724000  | 0.114499000  |
| C  | 1.524181000  | 3.569353000  | -1.038172000 |
| H  | 2.274430000  | 2.845696000  | -1.386945000 |
| H  | 0.808367000  | 3.784723000  | -1.844524000 |
| H  | 2.005748000  | 4.494633000  | -0.701201000 |
| Fe | 0.647620000  | -0.198735000 | -0.074362000 |
| Br | 0.623604000  | -2.566659000 | -0.020728000 |
| Br | 3.018539000  | 0.160462000  | -0.482030000 |

**INT4:** E= -7122.852235

|    |              |              |              |
|----|--------------|--------------|--------------|
| C  | -0.224423000 | 2.681286000  | 1.656490000  |
| C  | -0.395243000 | 1.721157000  | 0.520489000  |
| C  | -0.287085000 | 1.719236000  | 2.858832000  |
| N  | -1.175024000 | 0.567870000  | 0.931119000  |
| C  | -1.313748000 | 0.662826000  | 2.426241000  |
| H  | -1.049283000 | 3.416310000  | 1.695726000  |
| H  | 0.700737000  | 1.255292000  | 3.008210000  |
| H  | -1.152953000 | -0.324947000 | 2.878865000  |
| H  | -2.340759000 | 0.990034000  | 2.652681000  |
| H  | -0.582033000 | 2.203133000  | 3.800464000  |
| H  | 0.722427000  | 3.232917000  | 1.586795000  |
| C  | 2.152400000  | -3.322285000 | -0.402251000 |
| H  | 2.873516000  | -2.497819000 | -0.354778000 |
| H  | 2.298628000  | -4.052974000 | 0.400418000  |
| H  | 2.126814000  | -3.797886000 | -1.388479000 |
| C  | -2.381719000 | 0.164358000  | 0.248919000  |
| C  | -2.858074000 | -1.135697000 | 0.465719000  |
| C  | -3.085085000 | 1.035104000  | -0.588941000 |
| C  | -4.030680000 | -1.563816000 | -0.159599000 |
| C  | -4.254234000 | 0.597761000  | -1.219218000 |
| C  | -4.731575000 | -0.699733000 | -1.009020000 |
| H  | -2.303318000 | -1.810796000 | 1.120916000  |
| H  | -2.720951000 | 2.051324000  | -0.746805000 |
| H  | -4.393327000 | -2.580077000 | 0.012911000  |
| H  | -4.796077000 | 1.281018000  | -1.877964000 |
| H  | -5.645092000 | -1.036660000 | -1.504538000 |
| C  | -0.012051000 | 1.796955000  | -0.841500000 |
| O  | -0.101995000 | 0.761327000  | -1.576915000 |
| O  | 0.549605000  | 2.934898000  | -1.260546000 |
| C  | 1.347376000  | 2.844831000  | -2.450007000 |
| H  | 2.160533000  | 2.117412000  | -2.303540000 |
| H  | 0.735199000  | 2.541088000  | -3.311587000 |
| H  | 1.758234000  | 3.848431000  | -2.614189000 |
| Fe | 0.635315000  | -0.031729000 | 0.221332000  |
| Br | 0.377773000  | -2.494843000 | -0.119996000 |
| Br | 3.055903000  | 0.250054000  | 0.072430000  |

**INT5:** E= -4508.854064

|   |              |              |              |
|---|--------------|--------------|--------------|
| C | 0.094891000  | 2.094389000  | 1.776891000  |
| C | -0.127121000 | 1.205642000  | 0.593372000  |
| C | -0.093263000 | 1.091436000  | 2.933106000  |
| N | -0.992082000 | 0.101980000  | 0.930159000  |
| C | -1.186267000 | 0.143859000  | 2.417321000  |
| H | -0.664902000 | 2.895547000  | 1.821272000  |
| H | 0.844970000  | 0.537871000  | 3.100106000  |
| H | -1.127669000 | -0.872509000 | 2.829939000  |
| H | -2.191628000 | 0.546947000  | 2.619135000  |
| H | -0.383142000 | 1.561483000  | 3.883023000  |
| H | 1.086767000  | 2.564481000  | 1.757662000  |
| C | -2.176530000 | -0.218759000 | 0.170966000  |
| C | -2.632054000 | -1.541983000 | 0.190352000  |
| C | -2.872971000 | 0.756891000  | -0.548141000 |
| C | -3.790490000 | -1.888373000 | -0.508375000 |
| C | -4.025560000 | 0.401849000  | -1.255552000 |
| C | -4.489250000 | -0.917816000 | -1.236115000 |
| H | -2.063109000 | -2.293982000 | 0.741571000  |
| H | -2.509872000 | 1.786469000  | -0.558128000 |
| H | -4.141990000 | -2.922898000 | -0.493268000 |
| H | -4.564646000 | 1.163911000  | -1.823784000 |

|    |              |              |              |
|----|--------------|--------------|--------------|
| H  | -5.390485000 | -1.190754000 | -1.790178000 |
| C  | 0.345083000  | 1.261406000  | -0.741972000 |
| O  | 0.175631000  | 0.246558000  | -1.501090000 |
| O  | 1.052267000  | 2.335254000  | -1.108525000 |
| C  | 1.961712000  | 2.141227000  | -2.202505000 |
| H  | 2.667088000  | 1.328989000  | -1.964564000 |
| H  | 1.419553000  | 1.892246000  | -3.125995000 |
| H  | 2.497475000  | 3.090500000  | -2.322908000 |
| Fe | 0.785875000  | -0.526780000 | 0.234416000  |
| Br | 3.004604000  | -1.283970000 | -0.169685000 |
